# Supplementary material for: A four-component coupling reaction of carbon dioxide, amines, cyclic ethers and 3-triflyloxybenzynes for the synthesis of functionalized carbamates
Source: Royal Society of Chemistry journal article supplement (doi:10.1039/c8cc01732h), 2018-01-01

# **Four-Component Coupling Reaction of Carbon dioxide, Amines, Cyclic Ethers and 3-Triflyloxybenzynes for the Synthesis of Functionalized Carbamates**

Wenfang Xiong,<sup>a</sup> Chaorong Qi,<sup>\*a,b</sup> Ruixiang Cheng,<sup>a</sup> Hao Zhang,<sup>a</sup> Lu Wang,<sup>a</sup> Donghao Yan<sup>a</sup> and Huanfeng Jiang<sup>\*a</sup>

<sup>a</sup> Key Lab of Functional Molecular Engineering of Guangdong Province, School of Chemistry and Chemical Engineering, South China University of Technology, Guangzhou 510640, China

<sup>b</sup> State Key Lab of Luminescent Materials and Devices, South China University of Technology, Guangzhou 510640, China

*E-mail: crqi@scut.edu.cn or jianghf@scut.edu.cn*

## **List of Contents**

|                                                                             |            |
|-----------------------------------------------------------------------------|------------|
| <b>A. General methods .....</b>                                             | <b>S2</b>  |
| <b>B. General procedure for the preparation of organic carbamates .....</b> | <b>S2</b>  |
| <b>C. Optimization of reaction conditions .....</b>                         | <b>S3</b>  |
| <b>D. Procedure for the larger scale synthesis of 4c.....</b>               | <b>S4</b>  |
| <b>E. Procedure for the synthesis of compounds 5-8 .....</b>                | <b>S4</b>  |
| <b>F. NOE and HMBC interactions of the 4r and 4r' .....</b>                 | <b>S7</b>  |
| <b>G. HPLC Spectrums of 4o .....</b>                                        | <b>S9</b>  |
| <b>H. Analytical data .....</b>                                             | <b>S10</b> |
| <b>I. NMR Spetra.....</b>                                                   | <b>S19</b> |

## A. General methods

$^1\text{H}$  and  $^{13}\text{C}$  NMR spectra were recorded by using a 400 MHz NMR spectrometer. The chemical shifts are referenced to signals at 7.26 and 77.0 ppm, respectively, and  $\text{CDCl}_3$  is used as a solvent with TMS as the internal standard. Mass spectra were recorded on a gas chromatograph-mass spectrometer. The data of HRMS was carried out on a high-resolution mass spectrometer (LCMS-IT-TOF). IR spectra were obtained either as potassium bromide plates or as liquid films between two potassium bromide plates with an infrared spectrometer. Melting points were determined with a digital melting point measuring instrument. Substrates **1b-1h** were prepared according to the literature procedure.<sup>1</sup> Substrate **1a** and other reagents were commercially purchased and used without further purification. Reagent **3m** (optical rotation ( $c=10$ , in methanol): + 30.2°) was commercially purchased from Alfa Aesar. All air- and moisture-sensitive manipulations were carried out with standard Schlenk techniques under nitrogen or in a glove box.

## B. General procedure for the preparation of organic carbamates

In a glove box, TBAI (0.4 mmol), 3-triflyloxybenzynes **1** (0.1 mmol), cyclic ethers **2** (anhydrous, 3 mL) were added to a 25 mL Schlenk tube equipped with a Teflon cap and a magnetic stirring bar. After the sealed tube was taken out of the glovebox, the reaction mixture was subjected to vacuum for a while and  $\text{CO}_2$  (1 atm) was introduced into the reaction vessel. Subsequently, amines **3** (0.5 mmol) was slowly added to the resulted mixture via a syringe under stirring at room temperature. The reaction was allowed to continue at room temperature for 8 h. After the reaction was completed, the reaction mixture was quenched with saturated brine water (5 mL), then extracted with ethyl acetate (10 mL) and washed with saturated brine water. The organic layer was dried over anhydrous  $\text{Na}_2\text{SO}_4$ , then filtered and concentrated in vacuum. The crude residue was separated by column chromatography on silica gel to give the desired product **4**.

## C. Optimization of reaction conditions

**Table S1** Optimization of reaction conditions.<sup>a</sup>

Reaction scheme: **1** (2-(trimethylsilyl)-4-(trifluoromethoxy)phenyl) + **2a** (tetrahydrofuran) + **3a** (N-ethylpropan-1-amine) + CO<sub>2</sub>  $\xrightarrow{\text{base}}$  **4** (4-(4-(R)-2-(trifluoromethoxyphenyloxy)butyloxy)-N-ethylpropanamide).

| Entry           | R   | <b>1</b>  | Base                            | T [°C] | <b>4</b>  | Yield [%] <sup>b</sup> |
|-----------------|-----|-----------|---------------------------------|--------|-----------|------------------------|
| 1               | H   | <b>1a</b> | CsF                             | r.t.   | <b>4a</b> | n.d. <sup>c</sup>      |
| 2               | F   | <b>1b</b> | CsF                             | r.t.   | <b>4b</b> | trace                  |
| 3               | OTf | <b>1c</b> | CsF                             | r.t.   | <b>4c</b> | 79                     |
| 4               | OTf | <b>1c</b> | CsF                             | 0      | <b>4c</b> | 47                     |
| 5               | OTf | <b>1c</b> | CsF                             | 60     | <b>4c</b> | trace                  |
| 6 <sup>d</sup>  | OTf | <b>1c</b> | CsF                             | r.t.   | <b>4c</b> | n.d.                   |
| 7 <sup>e</sup>  | OTf | <b>1c</b> | CsF                             | r.t.   | <b>4c</b> | trace                  |
| 8 <sup>f</sup>  | OTf | <b>1c</b> | CsF                             | r.t.   | <b>4c</b> | 54                     |
| 9 <sup>g</sup>  | OTf | <b>1c</b> | CsF                             | r.t.   | <b>4c</b> | 18                     |
| 10              | OTf | <b>1c</b> | KF                              | r.t.   | <b>4c</b> | 61                     |
| 11              | OTf | <b>1c</b> | Cs <sub>2</sub> CO <sub>3</sub> | r.t.   | <b>4c</b> | 80                     |
| 12              | OTf | <b>1c</b> | K <sub>2</sub> CO <sub>3</sub>  | r.t.   | <b>4c</b> | 11                     |
| 13              | OTf | <b>1c</b> | TBAF                            | r.t.   | <b>4c</b> | 31                     |
| 14              | OTf | <b>1c</b> | TBAC                            | r.t.   | <b>4c</b> | 45                     |
| 15              | OTf | <b>1c</b> | TBAI                            | r.t.   | <b>4c</b> | 81                     |
| 16 <sup>h</sup> | OTf | <b>1c</b> | TBAI                            | r.t.   | <b>4c</b> | 83(78)                 |
| 17 <sup>i</sup> | OTf | <b>1c</b> | TBAI                            | r.t.   | <b>4c</b> | 63                     |
| 18 <sup>j</sup> | OTf | <b>1c</b> | TBAI                            | r.t.   | <b>4c</b> | (55)                   |
| 19              | OTf | <b>1c</b> | -                               | r.t.   | <b>4c</b> | 13                     |

<sup>a</sup> Reaction conditions: **1** (0.1 mmol), **2a** (THF, 3 mL), **3a** (5 equiv), base (3 equiv.), CO<sub>2</sub> (1 atm), 8 h. <sup>b</sup> GC yield with dodecane as the internal standard; the number in parentheses is the yield of the isolated product. <sup>c</sup> n.d. = not detected. <sup>d</sup> The reaction was carried out with 5 equiv. of THF using DMF (3mL) as the solvent. <sup>e</sup> The reaction was performed with 5 equiv. of THF using MeCN (3mL) as the solvent. <sup>f</sup> 4 h. <sup>g</sup> 18-Crown-6 (3 equiv) was added. <sup>h</sup> TBAI (4 equiv.). <sup>i</sup> TBAI (2 equiv.). <sup>j</sup> The

reaction was carried out on a 1 mmol scale.

## D. Procedure for the larger scale synthesis of 4c

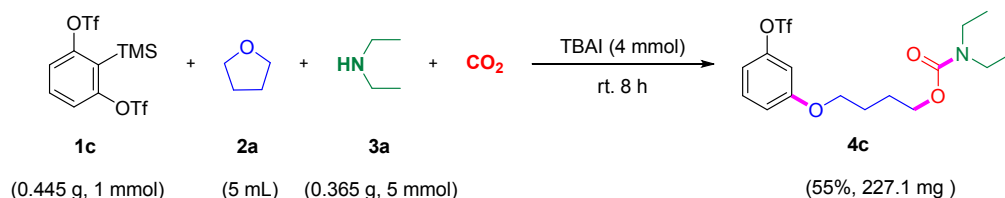

In a glove box, TBAI (4 mmol), 2-(trimethylsilyl)-1,3-phenylene bis(trifluoromethanesulfonate) **1c** (1 mmol), anhydrous tetrahydrofuran **2a** (5 mL) were added to a 25 mL Schlenk tube equipped with a Teflon cap and a magnetic stirring bar. After the sealed tube was taken out of the glovebox, the reaction mixture was subjected to vacuum for a while and CO<sub>2</sub> (1 atm) was introduced into the reaction vessel. Subsequently, amines **3a** (5 mmol) was slowly added to the resulted mixture via a syringe under stirring at room temperature. The reaction was allowed to continue at room temperature for 8 h. After the reaction was completed, the reaction mixture was quenched with saturated brine water (10 mL), then extracted with ethyl acetate (30 mL) and washed with saturated brine water. The organic layer was dried over anhydrous Na<sub>2</sub>SO<sub>4</sub>, then filtered and concentrated in vacuum. The crude residue was separated by column chromatography on silica gel to give the desired product **4c**.

## E. Procedure for the synthesis of compounds 5-8

### Procedure for the synthesis of compounds 5:

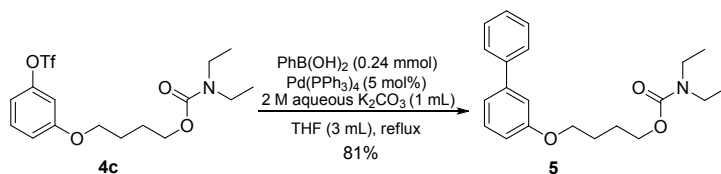

To a solution of 3-(4-((diethylcarbamoyl)oxy)butoxy)phenyl trifluoromethanesulfonate **4c** (0.2 mmol) in THF (2 mL) at room temperature was added Pd(PPh<sub>3</sub>)<sub>4</sub> (0.01 mmol) under N<sub>2</sub>. After the reaction was stirred for 20 minutes, 2 M aqueous K<sub>2</sub>CO<sub>3</sub> (1 mL) and a solution of phenylboronic acid (0.24 mmol) in THF (1 mL) was added successively. The resulting mixture was refluxed for 12 h. The desired product **5** was concentrated and purified by column chromatography on silica gel.

### Procedure for the synthesis of compounds 6:

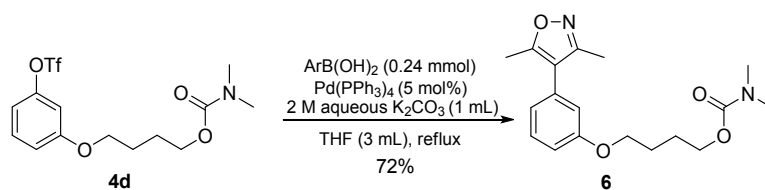

To a solution of 3-(4-((dimethylcarbamoyl)oxy)butoxy)phenyl trifluoromethanesulfonate **4d** (0.2 mmol) in THF (2 mL) at room temperature was added  $\text{Pd}(\text{PPh}_3)_4$  (0.01 mmol) under  $\text{N}_2$ . After the reaction was stirred for 20 minutes, 2 M aqueous  $\text{K}_2\text{CO}_3$  (1 mL) and a solution of (3,5-dimethylisoxazol-4-yl)boronic acid (0.24 mmol) in THF (1 mL) was added successively. The resulting mixture was refluxed for 12 h. The desired product **6** was concentrated and purified by column chromatography on silica gel.

#### Procedure for the synthesis of compounds 7:

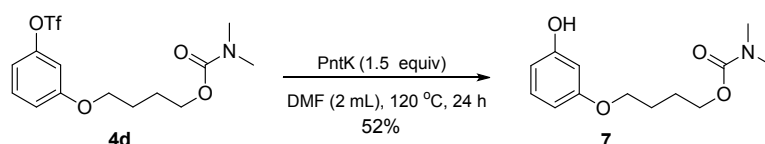

To a solution of 3-(4-((dimethylcarbamoyl)oxy)butoxy)phenyl trifluoromethanesulfonate **4d** (0.2 mmol) in DMF (2 mL) was added potassium phthalimide (0.3 mmol). The mixture was stirred at 120 °C for 24 h. After the reaction was completed, the reaction mixture was quenched with 2 M HCl (2 mL), then extracted with ethyl acetate (10 mL) and washed with saturated brine water. The organic layer was dried over anhydrous  $\text{Na}_2\text{SO}_4$ , then filtered and concentrated in vacuum. The volatile compounds were removed under vacuum and the crude residue was separated by column chromatography on silica gel to give the desired product **7**.

#### Procedure for the synthesis of compounds 8:

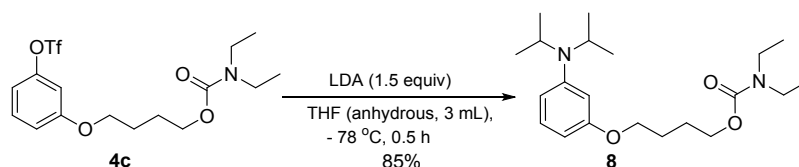

To a solution of 3-(4-((diethylcarbamoyl)oxy)butoxy)phenyl trifluoromethanesulfonate **4c** (0.2 mmol) in anhydrous THF (3 mL) at -78 °C was slowly added Lithium diisopropylamide (0.3 mmol) under  $\text{N}_2$ . The mixture was stirred at the same temperature for 0.5 h. After the reaction was completed, the reaction mixture was quenched with distilled water (5 mL), then extracted with ethyl

acetate (10 mL) and washed with saturated brine water. The organic layer was dried over anhydrous  $\text{Na}_2\text{SO}_4$ , then filtered and concentrated in vacuum. The volatile compounds were removed under vacuum and the crude residue was separated by column chromatography on silica gel to give the desired product **8**.

## F. NOE and HMBC interactions of the 4r and 4r'

The NOE interactions of the 4r

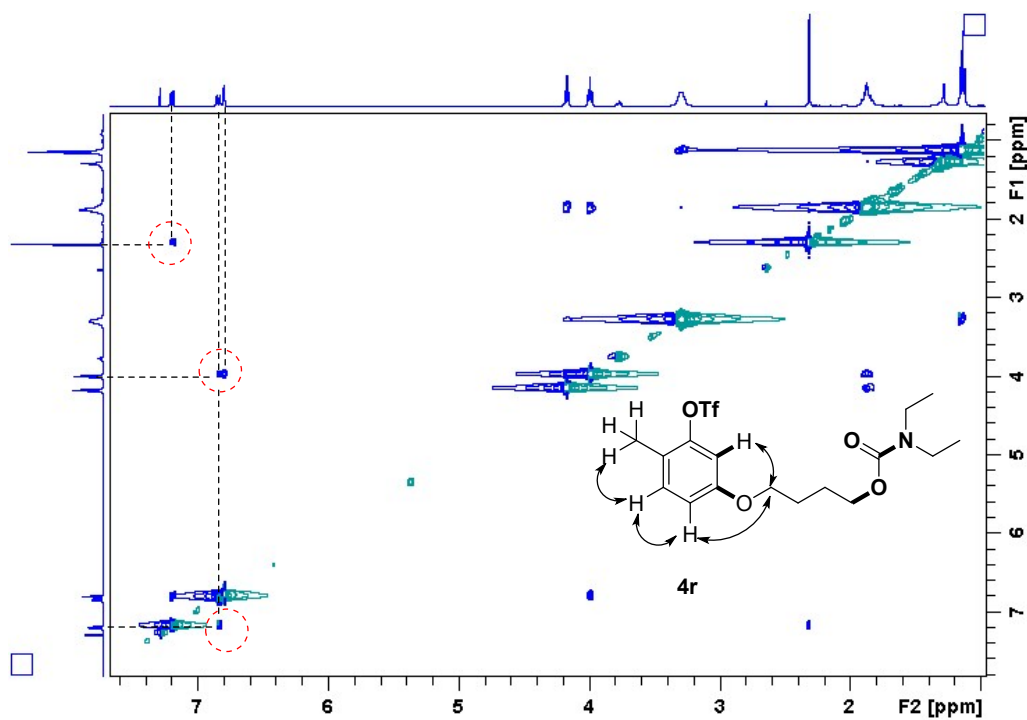

The HMBC interactions of the 4r

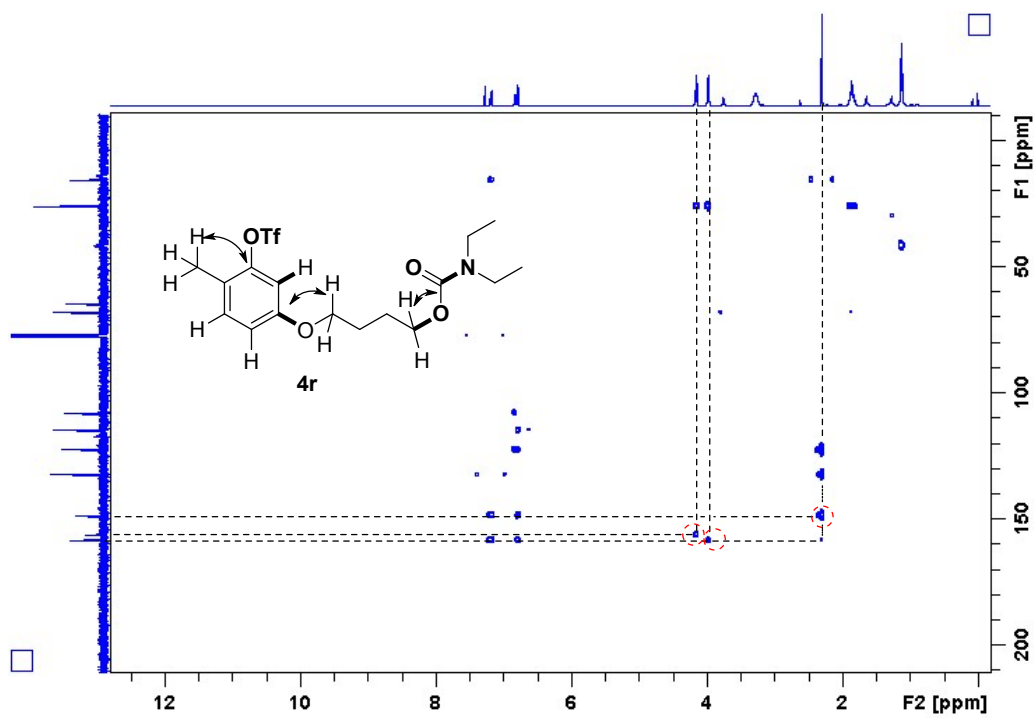

### The NOE interactions of the 4r'

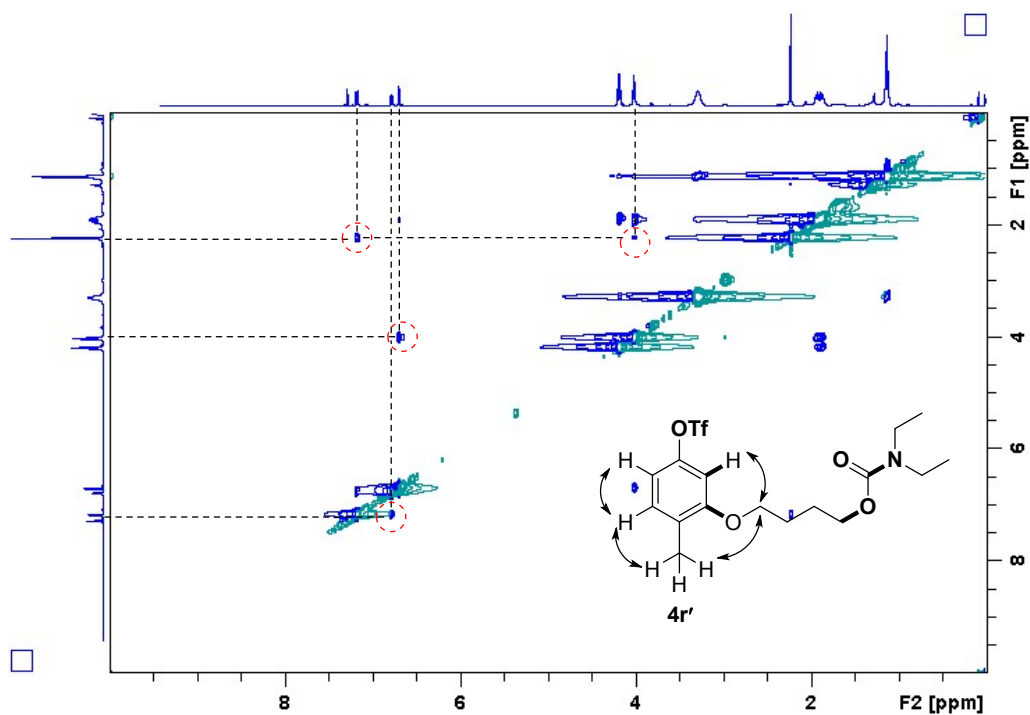

### The HMBC interactions of the 4r'

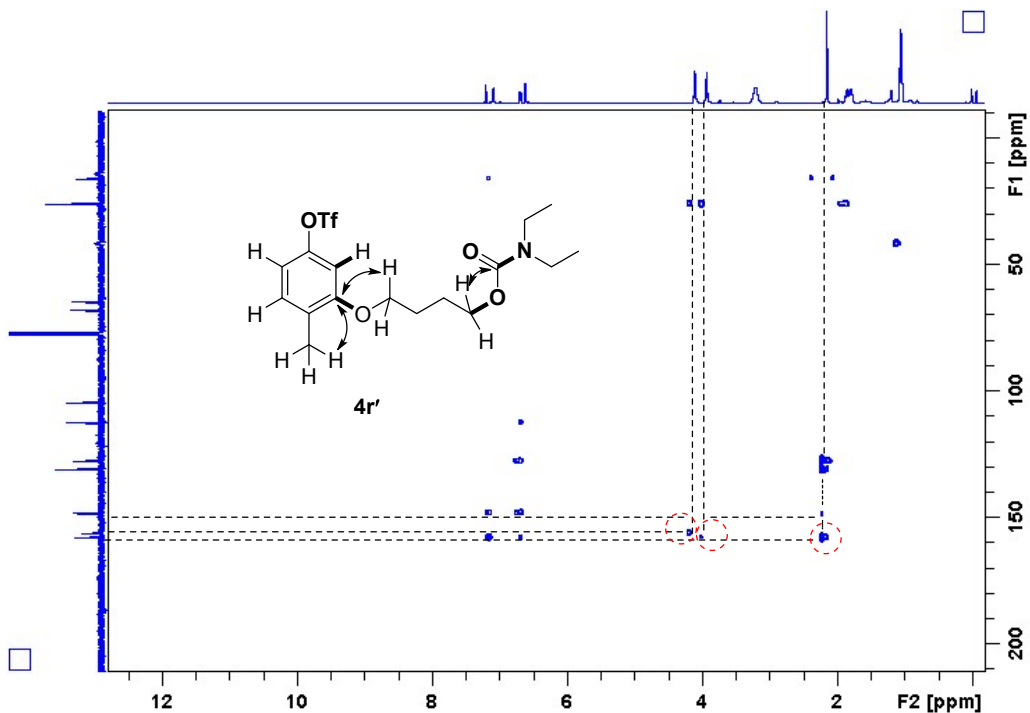



## G. HPLC Spectrums of 4o

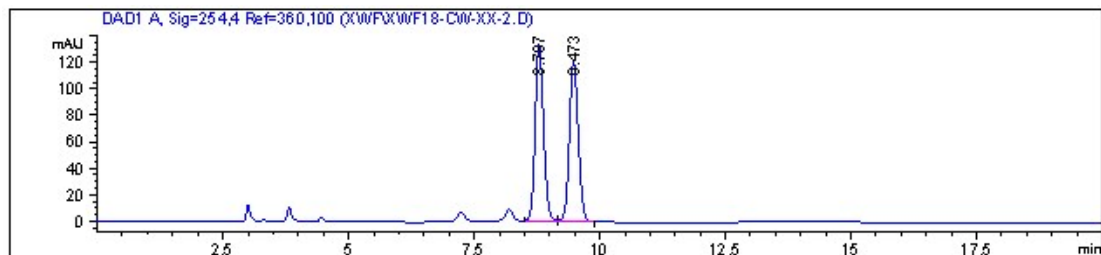

| Peak | Ret Time (min) | Area       | Height (mAU) | Width (min) | Area (%) |
|------|----------------|------------|--------------|-------------|----------|
| 1    | 8.787          | 1568.25354 | 133.89609    | 0.1806      | 51.0693  |
| 2    | 9.473          | 1502.57849 | 120.60860    | 0.1933      | 48.9307  |

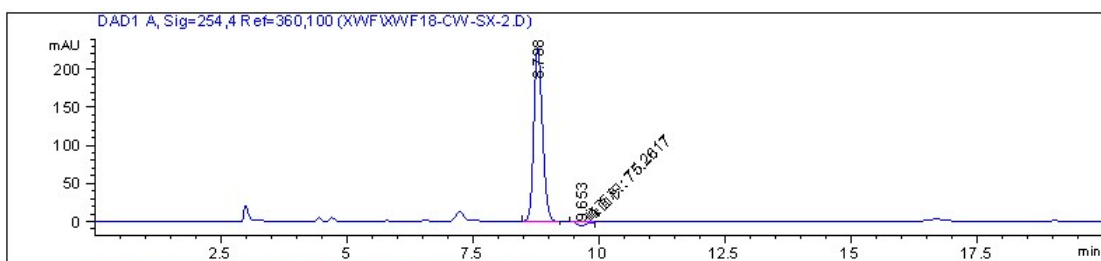

| Peak | Ret Time (min) | Area       | Height (mAU) | Width (min) | Area (%) |
|------|----------------|------------|--------------|-------------|----------|
| 1    | 8.788          | 2728.16309 | 228.35535    | 0.1854      | 97.3154  |
| 2    | 9.653          | 75.26171   | 6.04863      | 0.2074      | 2.6846   |

Chiral HPLC analyses were performed on an Agilent 1200 system using a Chiralcel IA-H column (25 °C, flow rate: 1.0 mL/min, hexanes/isopropanol: 90/10, 254 nm).

## H. Analytical data

### 3-(4-((Diethylcarbamoyl)oxy)butoxy)phenyl trifluoromethanesulfonate (4c)

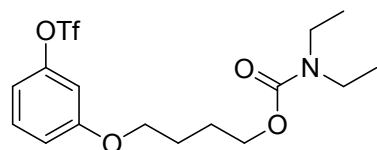

Pale yellow oil (32.2 mg, 78%).  $^1\text{H}$  NMR (400 MHz,  $\text{CDCl}_3$ )  $\delta$  = 7.32 (t,  $J$  = 8.4 Hz, 1 H), 6.91 (dd,  $J$  = 8.4 Hz, 2.2 Hz, 1 H), 6.85 (dd,  $J$  = 8.2 Hz, 2.0 Hz, 1 H), 6.80 (t,  $J$  = 2.4 Hz, 1 H), 4.16 (t,  $J$  = 6.0 Hz, 2 H), 4.01 (t,  $J$  = 6.0 Hz, 2 H), 3.27 (s, 4 H), 1.91 – 1.81 (m, 4 H), 1.12 (t,  $J$  = 7.0 Hz, 6 H).  $^{13}\text{C}$  NMR (100 MHz,  $\text{CDCl}_3$ )  $\delta$  = 160.2, 155.9, 150.2, 130.5, 118.7 ( $J$  = 318.8 Hz), 114.5, 113.1, 107.9, 67.9, 64.4, 41.7, 41.2, 25.8, 13.9, 13.5.  $^{19}\text{F}$  NMR (376 MHz,  $\text{CDCl}_3$ )  $\delta$  = -72.97. IR (KBr) = 2971, 2930, 1696, 1613, 1483, 1425, 1276, 1214, 1142, 1108, 945, 846, 774, 605, 512  $\text{cm}^{-1}$ . HRMS-ESI ( $m/z$ ): calcd for  $\text{C}_{16}\text{H}_{22}\text{F}_3\text{NO}_6\text{SNa}$  ( $M + \text{Na}$ ) $^+$ : 436.1012; found: 436.1017.

### 3-(4-((Dimethylcarbamoyl)oxy)butoxy)phenyl trifluoromethanesulfonate (4d)

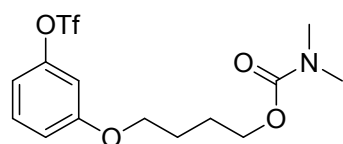

Pale yellow oil (25.0 mg, 65%).  $^1\text{H}$  NMR (400 MHz,  $\text{CDCl}_3$ )  $\delta$  = 7.32 (t,  $J$  = 8.4 Hz, 1H), 6.91 (dd,  $J$  = 8.4 Hz, 2.4 Hz, 1 H), 6.85 (dd,  $J$  = 8.0 Hz, 2.0 Hz, 1 H), 6.79 (t,  $J$  = 2.4 Hz, 1 H), 4.15 (t,  $J$  = 6.0 Hz, 2 H), 4.00 (t,  $J$  = 6.0 Hz, 2 H), 2.90 (s, 6 H), 1.92 – 1.80 (m, 4 H).  $^{13}\text{C}$  NMR (100 MHz,  $\text{CDCl}_3$ )  $\delta$  = 160.2, 156.7, 150.2, 130.5, 118.7 ( $J$  = 318.8 Hz), 114.6, 113.1, 107.9, 67.9, 64.8, 36.4, 35.8, 25.7.  $^{19}\text{F}$  NMR (376 MHz,  $\text{CDCl}_3$ )  $\delta$  = -72.93. IR (KBr) = 2923, 2856, 1704, 1582, 1489, 1420, 1209, 1142, 938, 857, 604  $\text{cm}^{-1}$ . HRMS-ESI ( $m/z$ ): calcd for  $\text{C}_{14}\text{H}_{18}\text{F}_3\text{NNaO}_6\text{S}$  ( $M + \text{Na}$ ) $^+$ : 408.0699; found: 408.0704.

### 3-(4-((Dipropylcarbamoyl)oxy)butoxy)phenyl trifluoromethanesulfonate (4e)

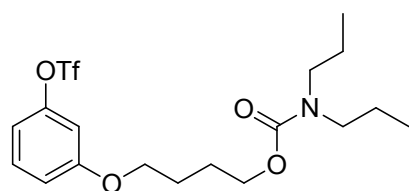

Pale yellow oil (31.2 mg, 71%).  $^1\text{H}$  NMR (400 MHz,  $\text{CDCl}_3$ )  $\delta$  = 7.32 (t,  $J$  = 8.0 Hz, 1 H), 6.91 (d,  $J$  = 8.4 Hz, 1 H), 6.85 (d,  $J$  = 8.0 Hz, 1 H), 6.79 (s, 1 H), 4.14 (t,  $J$  = 6.4 Hz, 2 H), 4.00 (t,  $J$  = 5.6 Hz, 2 H), 3.17 (s, 4 H), 1.90 – 1.79 (m, 4 H), 1.59 – 1.49 (m, 4 H), 0.88 (t,  $J$  = 7.2 Hz, 6 H).  $^{13}\text{C}$  NMR (100 MHz,  $\text{CDCl}_3$ )  $\delta$  = 160.2, 156.4, 150.2, 130.5, 118.7 ( $J$  = 318.8 Hz), 114.6, 113.1, 108.0, 68.0, 64.4, 49.2, 48.7, 25.8, 25.8, 21.9, 21.3, 11.2.  $^{19}\text{F}$  NMR (376 MHz,  $\text{CDCl}_3$ )  $\delta$  = -72.94. IR (KBr) = 2961, 2927, 1698, 1612, 1475, 1423, 1213, 1143, 1107, 946, 845, 772, 604  $\text{cm}^{-1}$ . HRMS-ESI ( $m/z$ ): calcd for  $\text{C}_{18}\text{H}_{26}\text{F}_3\text{NO}_6\text{SNa}$  ( $M + \text{Na}$ ) $^+$ : 464.1325; found: 464.1332.

### 3-(4-((Dibutylcarbamoyl)oxy)butoxy)phenyl trifluoromethanesulfonate (4f)

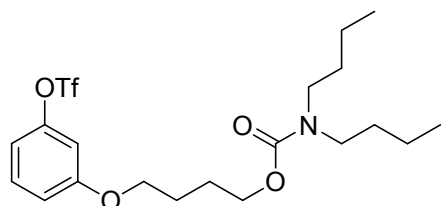

Pale yellow oil (31.5 mg, 67%).  $^1\text{H}$  NMR (400 MHz,  $\text{CDCl}_3$ )  $\delta$  = 7.32 (t,  $J$  = 8.4 Hz, 1 H), 6.90 (d,  $J$  = 8.4 Hz, 1 H), 6.85 (d,  $J$  = 8.4 Hz, 1 H), 6.79 (s, 1 H), 4.14 (t,  $J$  = 5.6 Hz, 2 H), 4.00 (t,  $J$  = 5.6 Hz, 2 H), 3.20 (s, 4 H), 1.91 – 1.79 (m, 4 H), 1.54 – 1.46 (m, 4 H), 1.33 – 1.27 (m, 4 H), 0.92 (t,  $J$  = 7.2 Hz, 6 H).  $^{13}\text{C}$  NMR (100 MHz,  $\text{CDCl}_3$ )  $\delta$  = 160.2, 156.4, 150.2, 130.5, 118.7 ( $J$  = 318.6 Hz), 114.6, 113.1, 108.0, 68.0, 64.4, 47.2, 46.6, 30.8, 30.3, 25.8, 20.0, 13.8.  $^{19}\text{F}$  NMR (376 MHz,  $\text{CDCl}_3$ )  $\delta$  = -72.94. IR (KBr) = 2957, 2933, 2875, 1697, 1612, 1477, 1424, 1216, 1145, 1107, 942, 846, 604  $\text{cm}^{-1}$ . HRMS-ESI ( $m/z$ ): calcd for  $\text{C}_{20}\text{H}_{30}\text{F}_3\text{NO}_6\text{SNa}$  ( $\text{M} + \text{Na}$ ) $^+$ : 492.1638; found: 492.1643.

### 3-(4-((Methyl(propyl)carbamoyl)oxy)butoxy)phenyl trifluoromethanesulfonate (4g)

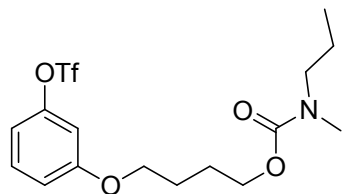

Pale yellow oil (31.4 mg, 76%).  $^1\text{H}$  NMR (400 MHz,  $\text{CDCl}_3$ )  $\delta$  = 7.32 (t,  $J$  = 8.4 Hz, 1 H), 6.91 (d,  $J$  = 8.4 Hz, 1 H), 6.85 (d,  $J$  = 8.0 Hz, 1 H), 6.79 (s, 1 H), 4.15 (t,  $J$  = 6.0 Hz, 2 H), 4.00 (t,  $J$  = 6.0 Hz, 2 H), 3.21 (s, 2 H), 2.89 (s, 3 H), 1.91 – 1.79 (m, 4 H), 1.58 – 1.49 (m, 2 H), 0.88 (t,  $J$  = 7.2 Hz, 3 H).  $^{13}\text{C}$  NMR (100 MHz,  $\text{CDCl}_3$ )  $\delta$  = 160.2, 156.6, 150.2, 130.5, 118.7 ( $J$  = 318.9 Hz), 114.6, 113.1, 107.9, 68.0, 64.7, 50.6, 50.3, 25.8, 21.1, 20.7, 11.1.  $^{19}\text{F}$  NMR (376 MHz,  $\text{CDCl}_3$ )  $\delta$  = -72.93. IR (KBr) = 2959, 2871, 1700, 1606, 1582, 1484, 1421, 1213, 1142, 1105, 941, 849, 604, 509  $\text{cm}^{-1}$ . HRMS-ESI ( $m/z$ ): calcd for  $\text{C}_{16}\text{H}_{22}\text{F}_3\text{NNaO}_6\text{S}$  ( $\text{M} + \text{Na}$ ) $^+$ : 436.1012; found: 436.1011.

### 3-(4-((Benzyl(methyl)carbamoyl)oxy)butoxy)phenyl trifluoromethanesulfonate (4h)

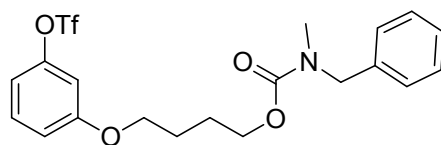

Pale yellow oil (24.0 mg, 52%).  $^1\text{H}$  NMR (400 MHz,  $\text{CDCl}_3$ )  $\delta$  = 7.36 – 7.18 (m, 6 H), 6.95 – 6.82 (m, 2 H), 6.78 (s, 1 H), 4.47 (s, 2 H), 4.21 (s, 2 H), 3.97 (d,  $J$  = 24.8 Hz, 2 H), 2.86 (d,  $J$  = 31.3 Hz, 3 H), 1.83 (s, 4 H).  $^{13}\text{C}$  NMR (100 MHz,  $\text{CDCl}_3$ )  $\delta$  = 160.1, 156.8, 156.5, 150.1, 137.5, 130.5, 128.6, 127.8, 127.3, 127.2, 127.1, 118.7 ( $J$  = 318.9 Hz), 114.5, 113.1, 107.9, 67.9, 65.0, 52.4, 52.3, 34.4, 33.5, 25.7.  $^{19}\text{F}$  NMR (376 MHz,  $\text{CDCl}_3$ )  $\delta$  = -72.91. IR (KBr) = 2928, 1701, 1612, 1587, 1485, 1419, 1213, 1143, 1105, 945, 848, 771, 697, 604, 511  $\text{cm}^{-1}$ . HRMS-ESI ( $m/z$ ): calcd for  $\text{C}_{20}\text{H}_{22}\text{F}_3\text{NNaO}_6\text{S}$  ( $\text{M} + \text{Na}$ ) $^+$ : 484.1012; found: 484.1016.

#### 4-(3-(((Trifluoromethyl)sulfonyl)oxy)phenoxy)butyl piperidine-1-carboxylate (4i)

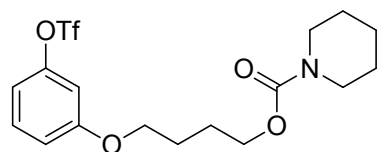

Pale yellow oil (29.6 mg, 70%).  $^1\text{H}$  NMR (400 MHz,  $\text{CDCl}_3$ )  $\delta$  = 7.32 (t,  $J$  = 8.4 Hz, 1 H), 6.93 – 6.88 (m, 1 H), 6.85 (d,  $J$  = 8.4 Hz, 1 H), 6.79 (s, 1 H), 4.15 (t,  $J$  = 6.0 Hz, 2 H), 4.00 (t,  $J$  = 6.0 Hz, 2 H), 3.49 – 3.30 (m, 4 H), 1.93 – 1.80 (m, 4 H), 1.61 – 1.48 (m, 6 H).  $^{13}\text{C}$  NMR (100 MHz,  $\text{CDCl}_3$ )  $\delta$  = 160.2, 155.5, 150.2, 130.5, 118.7 ( $J$  = 318.7 Hz), 114.6, 113.1, 107.9, 68.0, 64.7, 44.8, 25.8, 25.7, 24.4.  $^{19}\text{F}$  NMR (376 MHz,  $\text{CDCl}_3$ )  $\delta$  = -72.92. IR (KBr) = 2933, 2858, 1697, 1611, 1426, 1214, 1144, 1106, 1028, 945, 849, 604  $\text{cm}^{-1}$ . HRMS-ESI ( $m/z$ ): calcd for  $\text{C}_{17}\text{H}_{22}\text{F}_3\text{NNaO}_6\text{S}$  ( $M + \text{Na}$ ) $^+$ : 448.1012; found: 448.1017.

#### 4-(3-(((Trifluoromethyl)sulfonyl)oxy)phenoxy)butyl azepane-1-carboxylate (4j)

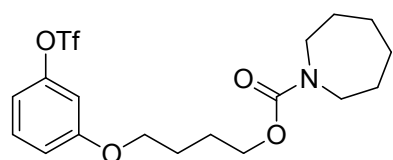

Pale yellow oil (30.1 mg, 69%).  $^1\text{H}$  NMR (400 MHz,  $\text{CDCl}_3$ )  $\delta$  = 7.32 (t,  $J$  = 8.4 Hz, 1 H), 6.92 – 6.88 (m, 1 H), 6.84 (d,  $J$  = 8.0 Hz, 1 H), 6.81 – 6.77 (m, 1 H), 4.16 (t,  $J$  = 6.0 Hz, 2 H), 4.00 (t,  $J$  = 6.0 Hz, 2 H), 3.40 (dt,  $J$  = 10.7 Hz, 5.6 Hz, 4 H), 1.91 – 1.80 (m, 4 H), 1.67 (d,  $J$  = 14.8 Hz, 4 H), 1.58 – 1.50 (m, 4 H).  $^{13}\text{C}$  NMR (100 MHz,  $\text{CDCl}_3$ )  $\delta$  = 160.2, 156.4, 150.2, 130.5, 118.7 ( $J$  = 319.0 Hz), 114.6, 113.1, 107.9, 68.0, 64.6, 46.9, 46.5, 28.5, 28.3, 27.4, 26.9, 25.8.  $^{19}\text{F}$  NMR (376 MHz,  $\text{CDCl}_3$ )  $\delta$  = -72.92. IR (KBr) = 2931, 2856, 1695, 1612, 1481, 1423, 1141, 1109, 946, 849, 769, 604  $\text{cm}^{-1}$ . HRMS-ESI ( $m/z$ ): calcd for  $\text{C}_{18}\text{H}_{24}\text{F}_3\text{NNaO}_6\text{S}$  ( $M + \text{Na}$ ) $^+$ : 462.1169; found: 462.1170.

#### 3-(4-((Propylcarbamoyl)oxy)butoxy)phenyl trifluoromethanesulfonate (4k)

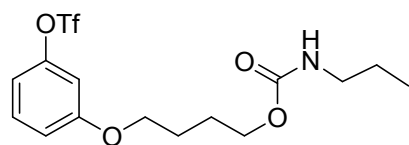

Pale yellow oil (24.3 mg, 61%).  $^1\text{H}$  NMR (400 MHz,  $\text{CDCl}_3$ )  $\delta$  = 7.32 (t,  $J$  = 8.4 Hz, 1 H), 6.91 (dd,  $J$  = 8.4 Hz, 2.0 Hz, 1 H), 6.85 (dd,  $J$  = 8.0 Hz, 2.0 Hz, 1 H), 6.79 (t,  $J$  = 2.1 Hz, 1 H), 4.67 (s, 1 H), 4.13 (t,  $J$  = 5.6 Hz, 2 H), 4.00 (t,  $J$  = 6.0 Hz, 2 H), 3.13 (d,  $J$  = 6.4 Hz, 2 H), 1.91 – 1.78 (m, 4 H), 1.56 – 1.47 (m, 2 H), 0.92 (t,  $J$  = 7.2 Hz, 3 H).  $^{13}\text{C}$  NMR (100 MHz,  $\text{CDCl}_3$ )  $\delta$  = 160.2, 156.7, 150.2, 130.5, 118.7 ( $J$  = 318.8 Hz), 114.6, 113.1, 107.9, 67.9, 64.2, 42.7, 25.7, 25.7, 23.2, 11.1.  $^{19}\text{F}$  NMR (376 MHz,  $\text{CDCl}_3$ )  $\delta$  = -72.93. IR (KBr) = 3344, 2959, 2928, 2880, 1711, 1613, 1527, 1483, 1421, 1214, 1141, 1109, 1044, 947, 847, 774, 604, 510  $\text{cm}^{-1}$ . HRMS-ESI ( $m/z$ ): calcd for  $\text{C}_{15}\text{H}_{20}\text{F}_3\text{NNaO}_6\text{S}$  ( $M + \text{Na}$ ) $^+$ : 422.0856; found: 422.0855.

**3-(4-((Pentylcarbamoyl)oxy)butoxy)phenyl trifluoromethanesulfonate (4l)**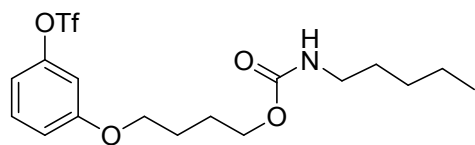

Pale yellow solid (24.8 mg, 58%, mp = 65-66 °C). <sup>1</sup>H

NMR (400 MHz, CDCl<sub>3</sub>) δ = 7.32 (t, *J* = 8.4 Hz, 1 H),

6.90 (d, *J* = 8.4 Hz, 1 H), 6.85 (d, *J* = 8.0 Hz, 1 H), 6.79

(s, 1 H), 4.65 (s, 1 H), 4.14 (t, *J* = 5.6 Hz, 2 H), 3.99 (t, *J* = 6.0 Hz, 2 H), 3.16 (q, *J* = 6.4 Hz, 2 H), 1.91

– 1.79 (m, 4 H), 1.53 – 1.45 (m, 2 H), 1.34 – 1.28 (m, 4 H), 0.90 (t, *J* = 6.4 Hz, 3 H). <sup>13</sup>C NMR (100

MHz, CDCl<sub>3</sub>) δ = 160.2, 156.6, 150.2, 130.5, 118.7 (*J* = 318.9 Hz), 114.6, 113.1, 107.9, 67.9, 64.2, 41.0,

29.7, 28.9, 25.7, 25.7, 22.3, 13.9. <sup>19</sup>F NMR (376 MHz, CDCl<sub>3</sub>) δ = -72.94. IR (KBr) = 3332, 2956, 2928,

2866, 1710, 1612, 1487, 1421, 1212, 1140, 1108, 1043, 946, 775, 680, 605, 511 cm<sup>-1</sup>. HRMS-ESI (*m/z*):

calcd for C<sub>17</sub>H<sub>24</sub>F<sub>3</sub>NNaO<sub>6</sub>S (M + Na)<sup>+</sup>: 450.1169; found: 450.1173.

**3-(4-((Cyclopentylcarbamoyl)oxy)butoxy)phenyl trifluoromethanesulfonate (4m)**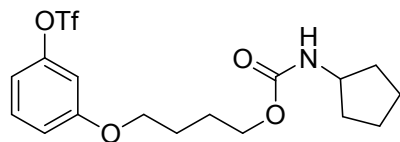

Pale yellow solid (21.6 mg, 51%, mp = 63-64 °C). <sup>1</sup>H NMR

(400 MHz, CDCl<sub>3</sub>) δ = 7.32 (t, *J* = 8.4 Hz, 1 H), 6.91 (dd, *J* =

8.4 Hz, 2.4 Hz, 1 H), 6.85 (dd, *J* = 8.0 Hz, 2.0 Hz, 1 H), 6.79 (t,

*J* = 2.0 Hz, 1 H), 4.60 (s, 1 H), 4.12 (s, 2 H), 4.04 – 3.89 (m, 3 H), 2.01 – 1.91 (m, 2 H), 1.90 – 1.78 (m,

4 H), 1.69 – 1.56 (m, 4 H), 1.43 – 1.34 (m, 2 H). <sup>13</sup>C NMR (100 MHz, CDCl<sub>3</sub>) δ = 160.2, 156.1, 150.2,

130.5, 118.7 (*J* = 318.8 Hz), 114.6, 113.1, 107.9, 67.9, 64.1, 52.7, 33.2, 25.7, 25.7, 23.5. <sup>19</sup>F NMR (376

MHz, CDCl<sub>3</sub>) δ = -72.92. IR (KBr) = 3335, 2961, 2926, 2861, 1710, 1613, 1488, 1422, 1214, 1141, 1108,

1043, 946, 848, 774, 605, 511 cm<sup>-1</sup>. HRMS-ESI (*m/z*): calcd for C<sub>17</sub>H<sub>22</sub>F<sub>3</sub>NNaO<sub>6</sub>S (M + Na)<sup>+</sup>: 448.1012;

found: 448.1016.

**3-(4-((Benzylcarbamoyl)oxy)butoxy)phenyl trifluoromethanesulfonate (4n)**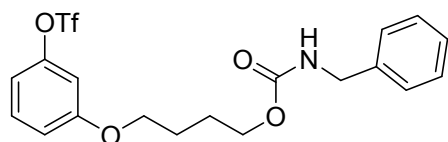

Pale yellow solid (21.3 mg, 48%, mp = 62-63 °C). <sup>1</sup>H

NMR (400 MHz, CDCl<sub>3</sub>) δ = 7.38 – 7.28 (m, 6 H), 6.92 (d,

*J* = 8.4 Hz, 1 H), 6.87 (d, *J* = 8.4 Hz, 1 H), 6.81 (s, 1 H),

4.99 (s, 1 H), 4.39 (d, *J* = 5.6 Hz, 2 H), 4.20 (t, *J* = 6.0 Hz, 2 H), 4.01 (t, *J* = 5.6 Hz, 2 H), 1.93 – 1.81

(m, 4 H). <sup>13</sup>C NMR (100 MHz, CDCl<sub>3</sub>) δ = 160.2, 156.6, 150.2, 138.5, 130.5, 128.7, 127.5, 118.7 (*J* =

318.9 Hz), 114.6, 113.1, 107.9, 67.9, 64.5, 45.1, 25.7, 25.6. <sup>19</sup>F NMR (376 MHz, CDCl<sub>3</sub>) δ = -72.89. IR

(KBr) = 3329, 3073, 2923, 1716, 1587, 1531, 1420, 1209, 1136, 916, 845, 743, 600, 510 cm<sup>-1</sup>. HRMS-

ESI (*m/z*): calcd for C<sub>19</sub>H<sub>20</sub>F<sub>3</sub>NNaO<sub>6</sub>S (M + Na)<sup>+</sup>: 470.0856; found: 470.0858.

**(R)-3-(4-(((1-Phenylethyl)carbamoyl)oxy)butoxy)phenyl trifluoromethanesulfonate (4o)**

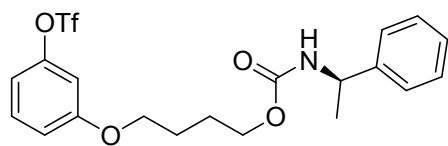

Pale yellow oil (20.6 mg, 45%).  $^1\text{H}$  NMR (400 MHz,  $\text{CDCl}_3$ )  $\delta$  = 7.36 – 7.24 (m, 6 H), 6.94 – 6.82 (m, 2 H), 6.78 (s, 1 H), 5.07 – 4.60 (m, 2 H), 4.16 – 4.07 (m, 2 H), 4.02 –

3.77 (m, 2 H), 1.90 – 1.68 (m, 4 H), 1.47 (d,  $J$ =6.6 Hz, 3 H).  $^{13}\text{C}$  NMR (100 MHz,  $\text{CDCl}_3$ )  $\delta$  = 160.2, 155.7, 150.2, 130.5, 128.6, 127.3, 125.9, 118.7 ( $J$  = 318.9 Hz), 114.6, 113.1, 107.9, 67.9, 64.3, 50.6, 25.6, 22.4.  $^{19}\text{F}$  NMR (376 MHz,  $\text{CDCl}_3$ )  $\delta$  = -72.89. IR (KBr) = 3326, 2929, 1710, 1611, 1489, 1420, 1216, 1139, 945, 846, 770, 698, 603, 512  $\text{cm}^{-1}$ . HRMS-ESI ( $m/z$ ): calcd for  $\text{C}_{20}\text{H}_{22}\text{F}_3\text{NNaO}_6\text{S}$  ( $\text{M} + \text{Na}$ ) $^+$ : 484.1012; found: 484.1015.

**3-(4-((Diethylcarbamoyl)oxy)butoxy)-5-methylphenyl trifluoromethanesulfonate (4p)**

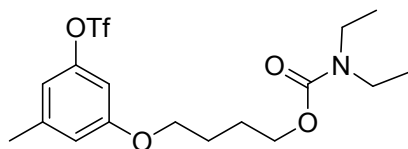

Pale yellow oil (26.1 mg, 61%).  $^1\text{H}$  NMR (400 MHz,  $\text{CDCl}_3$ )  $\delta$  = 6.65 (s, 1 H), 6.59 (s, 1 H), 6.52 (s, 1 H), 4.07 (t,  $J$  = 6.0 Hz, 2 H), 3.90 (t,  $J$  = 6.0 Hz, 2 H), 3.20 (s, 4 H), 2.27 (s, 3 H), 1.81

– 1.73 (m, 4 H), 1.04 (t,  $J$  = 7.2 Hz, 6 H).  $^{13}\text{C}$  NMR (100 MHz,  $\text{CDCl}_3$ )  $\delta$  = 159.9, 156.0, 145.0, 141.3, 118.7 ( $J$  = 318.6 Hz), 115.3, 113.8, 104.9, 67.9, 64.4, 41.7, 41.2, 25.8, 25.8, 21.5, 14.0, 13.6.  $^{19}\text{F}$  NMR (376 MHz,  $\text{CDCl}_3$ )  $\delta$  = -73.03, -73.04, -73.04. IR (KBr) = 2969, 2937, 1699, 1618, 1582, 1473, 1424, 1278, 1214, 1164, 1106, 963, 828, 771, 608  $\text{cm}^{-1}$ . HRMS-ESI ( $m/z$ ): calcd for  $\text{C}_{17}\text{H}_{24}\text{F}_3\text{NNaO}_6\text{S}$  ( $\text{M} + \text{Na}$ ) $^+$ : 450.1169; found: 450.1170.

**5-(4-((Diethylcarbamoyl)oxy)butoxy)-[1,1'-biphenyl]-3-yl trifluoromethanesulfonate (4q)**

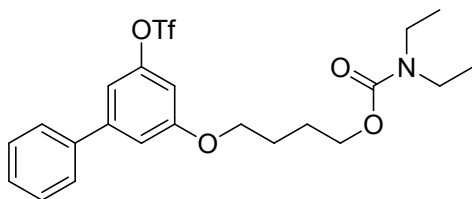

Pale yellow oil (34.8 mg, 71%).  $^1\text{H}$  NMR (400 MHz,  $\text{CDCl}_3$ )  $\delta$  = 7.56 – 7.52 (m, 2 H), 7.45 (t,  $J$  = 7.2 Hz, 2 H), 7.42 – 7.37 (m, 1 H), 7.14 – 7.10 (m, 1 H), 7.09 – 7.02 (m, 1 H), 6.77 (t,  $J$  = 2.2 Hz, 1 H), 4.17 (t,  $J$  = 6.4 Hz, 2

H), 4.06 (t,  $J$  = 6.0 Hz, 2 H), 3.27 (s, 4 H), 1.95 – 1.83 (m, 4 H), 1.11 (t,  $J$  = 7.2 Hz, 6 H).  $^{13}\text{C}$  NMR (100 MHz,  $\text{CDCl}_3$ )  $\delta$  = 160.3, 156.0, 150.4, 144.4, 139.2, 129.0, 128.4, 127.1, 118.7 ( $J$  = 318.8), 113.4, 112.1, 106.4, 68.1, 64.5, 41.4, 41.2, 25.8, 25.8, 13.9, 13.6.  $^{19}\text{F}$  NMR (376 MHz,  $\text{CDCl}_3$ )  $\delta$  = -72.83. IR (KBr) = 2966, 2930, 1697, 1614, 1578, 1466, 1423, 1274, 1213, 1141, 912, 749, 604  $\text{cm}^{-1}$ . HRMS-ESI ( $m/z$ ): calcd for  $\text{C}_{22}\text{H}_{26}\text{F}_3\text{NNaO}_6\text{S}$  ( $\text{M} + \text{Na}$ ) $^+$ : 512.1325; found: 512.1327.

**5-(4-((Diethylcarbamoyl)oxy)butoxy)-2-methylphenyl trifluoromethanesulfonate(4r)**

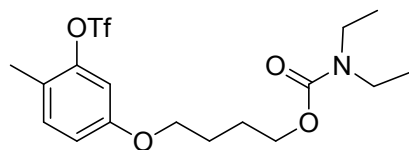

Pale yellow oil (21.3 mg, 50%).  $^1\text{H}$  NMR (400 MHz,  $\text{CDCl}_3$ )  $\delta$  = 7.17 (d,  $J$  = 8.4 Hz, 1 H), 6.82 (dd,  $J$  = 8.4 Hz, 2.4 Hz, 1 H), 6.77 (d,  $J$  = 2.4 Hz, 1 H), 4.15 (t,  $J$  = 6.0 Hz, 2 H), 3.97 (t,  $J$  = 6.0 Hz, 2 H), 3.27 (s, 4 H), 2.29 (s, 3 H), 1.88 – 1.80 (m, 4 H), 1.11 (t,  $J$  = 7.2 Hz, 6 H).  $^{13}\text{C}$  NMR (100 MHz,  $\text{CDCl}_3$ )  $\delta$  = 158.1, 156.0, 148.5, 132.2, 122.3, 118.6 ( $J$  = 318.3 Hz), 114.5, 107.8, 68.0, 64.5, 41.6, 41.3, 25.9, 25.8, 15.5, 13.9, 13.4.  $^{19}\text{F}$  NMR (376 MHz,  $\text{CDCl}_3$ )  $\delta$  = -73.86. IR (KBr) = 2966, 2928, 1698, 1608, 1270, 1212, 1139, 1001, 952, 860, 770, 602  $\text{cm}^{-1}$ . HRMS-ESI ( $m/z$ ): calcd for  $\text{C}_{17}\text{H}_{24}\text{F}_3\text{NNaO}_6\text{S}$  ( $\text{M} + \text{Na}$ ) $^+$ : 450.1169; found: 450.1165.

**3-(4-((Diethylcarbamoyl)oxy)butoxy)-4-methylphenyl trifluoromethanesulfonate(4r')**

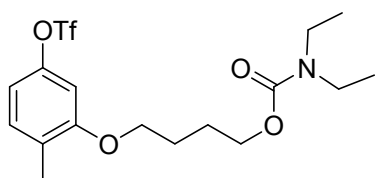

Pale yellow oil (14.9 mg, 35%).  $^1\text{H}$  NMR (400 MHz,  $\text{CDCl}_3$ )  $\delta$  = 7.08 (d,  $J$  = 8.4 Hz, 1 H), 6.68 (dd,  $J$  = 8.4 Hz, 2.4 Hz, 1 H), 6.61 (d,  $J$  = 2.0 Hz, 1 H), 4.10 (t,  $J$  = 6.4 Hz, 2 H), 3.93 (t,  $J$  = 6.0 Hz, 2 H), 3.20 (s, 4 H), 2.14 (s, 3 H), 1.87 – 1.77 (m, 4 H), 1.04 (t,  $J$  = 7.2 Hz, 6 H).  $^{13}\text{C}$  NMR (100 MHz,  $\text{CDCl}_3$ )  $\delta$  = 157.8, 156.0, 148.1, 130.9, 127.4, 118.7 ( $J$  = 318.9 Hz), 112.3, 104.3, 67.9, 64.6, 41.7, 41.2, 26.0, 25.9, 15.9, 14.0, 13.6.  $^{19}\text{F}$  NMR (376 MHz,  $\text{CDCl}_3$ )  $\delta$  = -72.88. IR (KBr) = 2928, 2866, 1699, 1626, 1507, 1477, 1422, 1213, 1143, 1072, 953, 847, 768, 606, 508  $\text{cm}^{-1}$ . HRMS-ESI ( $m/z$ ): calcd for  $\text{C}_{17}\text{H}_{24}\text{F}_3\text{NNaO}_6\text{S}$  ( $\text{M} + \text{Na}$ ) $^+$ : 450.1169; found: 450.1166.

**5-(4-((Diethylcarbamoyl)oxy)butoxy)-2-ethylphenyl trifluoromethanesulfonate (4s)**

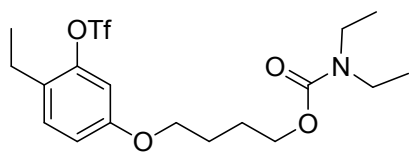

Pale yellow oil (18.0 mg, 41%).  $^1\text{H}$  NMR (400 MHz,  $\text{CDCl}_3$ )  $\delta$  = 7.21 (d,  $J$  = 8.8 Hz, 1 H), 6.85 (dd,  $J$  = 8.4 Hz, 1.6 Hz, 1 H), 6.77 (d,  $J$  = 2.0 Hz, 1 H), 4.14 (t,  $J$  = 6.0 Hz, 2 H), 3.97 (t,  $J$  = 5.6 Hz, 2 H), 3.27 (s, 4 H), 2.66 (q,  $J$  = 7.6 Hz, 2 H), 1.89 – 1.78 (m, 4 H), 1.22 (t,  $J$  = 7.6 Hz, 3 H), 1.11 (t,  $J$  = 7.2 Hz, 6 H).  $^{13}\text{C}$  NMR (100 MHz,  $\text{CDCl}_3$ )  $\delta$  = 158.0, 156.0, 147.9, 130.6, 128.2, 118.6 ( $J$  = 318.2 Hz), 114.7, 107.7, 67.9, 64.5, 41.7, 41.3, 25.9, 25.8, 22.3, 14.2, 14.1, 13.6.  $^{19}\text{F}$  NMR (376 MHz,  $\text{CDCl}_3$ )  $\delta$  = -73.94. IR (KBr) = 2961, 2926, 1699, 1624, 1506, 1469, 1422, 1274, 1214, 1174, 1142, 1075, 983, 847, 606  $\text{cm}^{-1}$ . HRMS-ESI ( $m/z$ ): calcd for  $\text{C}_{18}\text{H}_{26}\text{F}_3\text{NNaO}_6\text{S}$  ( $\text{M} + \text{Na}$ ) $^+$ : 464.1325; found: 464.1322.

### 3-(4-((Diethylcarbamoyloxy)butoxy)-4-ethylphenyl trifluoromethanesulfonate (4s')

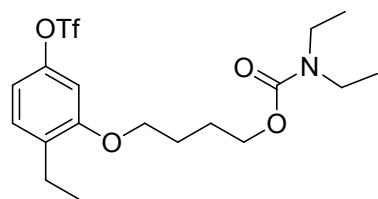

Pale yellow oil (15.5 mg, 35%).  $^1\text{H}$  NMR (400 MHz,  $\text{CDCl}_3$ )  $\delta$  = 7.17 (d,  $J$  = 8.4 Hz, 1 H), 6.79 (dd,  $J$  = 8.4 Hz, 2.0 Hz, 1 H), 6.69 (s, 1 H), 4.17 (t,  $J$  = 6.0 Hz, 2 H), 4.00 (t,  $J$  = 5.8 Hz, 2 H), 3.27 (s, 4 H), 2.63 (q,  $J$  = 7.2 Hz, 4 H), 1.94 – 1.84 (m, 4 H), 1.18 (t,  $J$  = 7.2 Hz, 3 H), 1.12 (t,  $J$  = 7.2 Hz, 6 H).  $^{13}\text{C}$  NMR (100 MHz,  $\text{CDCl}_3$ )  $\delta$  = 157.5, 156.0, 148.1, 133.2, 129.4, 118.7 ( $J$  = 318.5 Hz), 112.4, 104.4, 67.8, 64.5, 48.3, 41.6, 41.2, 25.9, 23.0, 13.7.  $^{19}\text{F}$  NMR (376 MHz,  $\text{CDCl}_3$ )  $\delta$  = -72.90. IR (KBr) = 2925, 2851, 1700, 1605, 1466, 1424, 1377, 1212, 1174, 1140, 955, 858, 603  $\text{cm}^{-1}$ . HRMS-ESI ( $m/z$ ): calcd for  $\text{C}_{18}\text{H}_{26}\text{F}_3\text{NNaO}_6\text{S}$  ( $\text{M} + \text{Na}$ ) $^+$ : 464.1325; found: 464.1320.

### The mixture of 3-((5-((Diethylcarbamoyloxy)pentan-2-yl)oxy)phenyl trifluoromethanesulfonate (4t) and 3-((4-((Diethylcarbamoyloxy)pentyl)oxy)phenyl trifluoromethanesulfonate (4t')

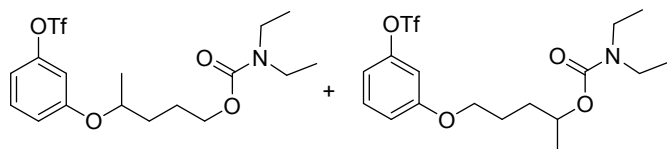

Pale yellow oil (19.8 mg, 46%).  $^1\text{H}$  NMR (400 MHz,  $\text{CDCl}_3$ )  $\delta$  = 7.35 – 7.28 (m, 1 H), 6.90 (t,  $J$  = 7.2 Hz, 1 H), 6.84 (t,  $J$  = 7.2 Hz, 1 H), 6.79 (s, 1 H), 4.95 – 4.86 (m, 0.5 H), 4.45 – 4.36 (m, 0.5 H), 4.11 (t,  $J$  = 6.0 Hz, 1 H), 3.98 (t,  $J$  = 6.4 Hz, 1 H), 3.26 (s, 4 H), 1.87 – 1.69 (m, 4 H), 1.32 (d,  $J$  = 6.0 Hz, 1.5 H), 1.27 (d,  $J$  = 6.0 Hz, 1.5 H), 1.11 (t,  $J$  = 6.8 Hz, 6 H).  $^{13}\text{C}$  NMR (100 MHz,  $\text{CDCl}_3$ )  $\delta$  = 160.3, 159.3, 156.0, 155.7, 150.3, 150.2, 130.5, 130.5, 118.7 ( $J$  = 318.9 Hz), 115.7, 114.6, 113.1, 113.0, 109.1, 108.0, 74.1, 70.7, 68.2, 64.6, 41.3, 41.2, 32.7, 25.1, 20.4, 19.3, 14.1, 13.7.  $^{19}\text{F}$  NMR (376 MHz,  $\text{CDCl}_3$ )  $\delta$  = -72.94. IR (KBr) = 2975, 2930, 1698, 1612, 1583, 1484, 1424, 1380, 1212, 1175, 1143, 1107, 1003, 971, 854, 774, 606, 511  $\text{cm}^{-1}$ . HRMS-ESI ( $m/z$ ): calcd for  $\text{C}_{17}\text{H}_{24}\text{F}_3\text{NNaO}_6\text{S}$  ( $\text{M} + \text{Na}$ ) $^+$ : 450.1169; found: 450.1167.

### 3-((5-((Diethylcarbamoyloxy)pentyl)oxy)phenyl trifluoromethanesulfonate (4u)

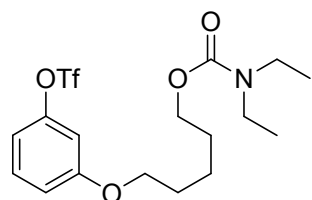

Pale yellow oil (22.2 mg, 52%).  $^1\text{H}$  NMR (400 MHz,  $\text{CDCl}_3$ )  $\delta$  = 7.32 (t,  $J$  = 8.4 Hz, 1 H), 6.90 (dd,  $J$  = 8.4 Hz, 2.0 Hz, 1 H), 6.84 (dd,  $J$  = 8.4 Hz, 2.0 Hz, 1 H), 6.78 (t,  $J$  = 2.3 Hz, 1 H), 4.11 (t,  $J$  = 6.4 Hz, 2 H), 3.97 (t,  $J$  = 6.4 Hz, 2 H), 3.27 (s, 4 H), 1.87 – 1.80 (m, 2 H), 1.73 – 1.68 (m, 2 H), 1.60 – 1.52 (m, 2 H), 1.11 (t,  $J$  = 7.2 Hz, 6 H).  $^{13}\text{C}$  NMR (100 MHz,  $\text{CDCl}_3$ )  $\delta$  = 160.3, 156.1, 150.2, 130.5, 118.7 ( $J$  = 318.7 Hz), 114.6, 113.0, 107.9, 68.3, 64.7, 41.7, 41.4, 28.8, 28.7, 22.5, 13.8, 13.7.  $^{19}\text{F}$  NMR (376 MHz,  $\text{CDCl}_3$ )  $\delta$  = -72.93. IR (KBr) = 2925, 2861, 1699, 1611, 1582, 1480, 1423, 1211, 1105, 1015, 845, 774, 680, 604, 511  $\text{cm}^{-1}$ . HRMS-ESI ( $m/z$ ): calcd for  $\text{C}_{17}\text{H}_{24}\text{F}_3\text{NNaO}_6\text{S}$  ( $\text{M} + \text{Na}$ ) $^+$ : 450.1169;



found: 450.1172.

**4-([1,1'-Biphenyl]-3-yloxy)butyl diethylcarbamate (5)**

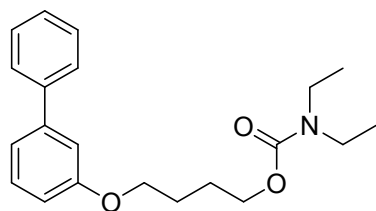

Pale yellow oil (55.3 mg, 81%).  $^1\text{H}$  NMR (400 MHz,  $\text{CDCl}_3$ )  $\delta$  = 7.58 (d,  $J$  = 7.6 Hz, 2 H), 7.42 (t,  $J$  = 7.6 Hz, 2 H), 7.33 (t,  $J$  = 8.0 Hz, 2 H), 7.17 (d,  $J$  = 7.6 Hz, 1 H), 7.12 (s, 1 H), 6.88 (dd,  $J$  = 8.0, 1.6 Hz, 1 H), 4.16 (t,  $J$  = 6.0 Hz, 2 H), 4.06 (t,  $J$  = 6.0 Hz, 2 H), 3.26 (s, 4 H), 1.93 – 1.82 (m, 4 H), 1.11 (t,  $J$  = 7.0 Hz, 6 H).  $^{13}\text{C}$  NMR (100 MHz,  $\text{CDCl}_3$ )  $\delta$  = 159.3, 156.0, 142.7, 141.1, 129.7, 128.7, 127.3, 127.1, 119.6, 113.5, 113.2, 67.4, 64.6, 41.6, 41.2, 26.0, 25.9, 14.1, 13.5. IR (KBr) = 3057, 2966, 2930, 1697, 1598, 1476, 1427, 1379, 1275, 1210, 1172, 1070, 1005, 760, 699  $\text{cm}^{-1}$ . HRMS-ESI ( $m/z$ ): calcd for  $\text{C}_{21}\text{H}_{28}\text{NO}_3$  ( $\text{M} + \text{H}$ ) $^+$ : 342.2064; found: 342.2055.

**4-(3-(3,5-Dimethylisoxazol-4-yl)phenoxy)butyl dimethylcarbamate (6)**

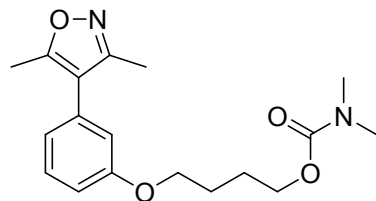

Pale yellow oil (47.8 mg, 72%).  $^1\text{H}$  NMR (400 MHz,  $\text{CDCl}_3$ )  $\delta$  = 7.34 (t,  $J$  = 8.0 Hz, 1 H), 6.89 (dd,  $J$  = 8.4 Hz, 2.4 Hz, 1 H), 6.83 (d,  $J$  = 7.2 Hz, 1 H), 6.78 (d,  $J$  = 2.4 Hz, 1 H), 4.16 (t,  $J$  = 6.0 Hz, 2 H), 4.03 (t,  $J$  = 6.0 Hz, 2 H), 2.91 (s, 6 H), 2.42 (s, 3 H), 2.28 (s, 3 H), 1.93 – 1.82 (m, 4 H).  $^{13}\text{C}$  NMR (100 MHz,  $\text{CDCl}_3$ )  $\delta$  = 165.1, 159.1, 158.6, 156.6, 131.7, 129.7, 121.4, 116.5, 115.5, 113.2, 67.4, 64.8, 36.3, 35.7, 25.8, 25.8, 11.5, 10.8. IR (KBr) = 2930, 2871, 1703, 1583, 1490, 1368, 1299, 1247, 1190, 1058, 967, 868, 783, 699, 617  $\text{cm}^{-1}$ . HRMS-ESI ( $m/z$ ): calcd for  $\text{C}_{18}\text{H}_{25}\text{N}_2\text{O}_4$  ( $\text{M} + \text{H}$ ) $^+$ : 333.1809; found: 333.1805.

**4-(3-Hydroxyphenoxy)butyl dimethylcarbamate (7)**

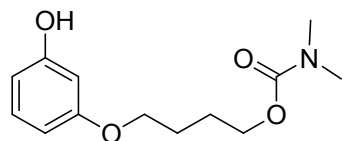

Pale yellow oil (26.3 mg, 52%).  $^1\text{H}$  NMR (400 MHz,  $\text{CDCl}_3$ )  $\delta$  = 7.09 (t,  $J$  = 8.0 Hz, 1H), 6.56 – 6.34 (m, 3 H), 4.16 (d,  $J$  = 6.0 Hz, 2 H), 3.94 (d,  $J$  = 5.2 Hz, 2 H), 2.90 (s, 6 H), 1.82 (s, 4 H).  $^{13}\text{C}$  NMR (100 MHz,  $\text{CDCl}_3$ )  $\delta$  = 160.2, 157.3, 157.0, 123.0, 107.8, 106.6, 102.1, 67.3, 65.2, 36.1, 36.0, 25.8, 25.8. IR (KBr) = 3352, 2927, 2861, 1678, 1600, 1495, 1463, 1406, 1369, 1285, 1201, 1153, 1056, 845, 768, 690  $\text{cm}^{-1}$ . HRMS-ESI ( $m/z$ ): calcd for  $\text{C}_{13}\text{H}_{19}\text{NNaO}_4$  ( $\text{M} + \text{Na}$ ) $^+$ : 276.1206; found: 276.1207.

#### 4-(3-(Diisopropylamino)phenoxy)butyl diethylcarbamate (8)

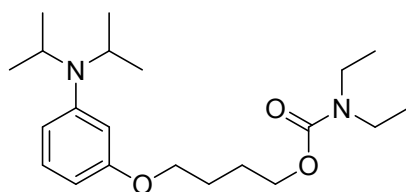

Pale yellow oil (61.9 mg, 85%).  $^1\text{H}$  NMR (400 MHz,  $\text{CDCl}_3$ )  $\delta$  = 7.06 (t,  $J$  = 8.2 Hz, 1 H), 6.49 (d,  $J$  = 8.2 Hz, 1 H), 6.42 (s, 1 H), 6.31 (d,  $J$  = 7.6 Hz, 1 H), 4.14 (t,  $J$  = 6.0 Hz, 2 H), 3.97 (t,  $J$  = 6.0 Hz, 2 H), 3.81 – 3.73 (m, 2 H), 3.27 (s, 4 H), 1.87 – 1.80 (m, 4 H), 1.22 (d,  $J$  = 6.8 Hz, 12 H), 1.11 (t,  $J$  = 7.2 Hz, 6 H).  $^{13}\text{C}$  NMR (100 MHz,  $\text{CDCl}_3$ )  $\delta$  = 159.5, 156.0, 149.4, 128.8, 111.6, 105.4, 103.2, 67.2, 64.7, 47.5, 41.6, 41.2, 26.1, 25.9, 21.3, 14.0, 13.6. IR (KBr) = 2972, 2871, 1700, 1603, 1488, 1430, 1375, 1275, 1212, 1167, 1070, 826, 768, 698  $\text{cm}^{-1}$ . HRMS-ESI ( $m/z$ ): calcd for  $\text{C}_{21}\text{H}_{37}\text{N}_2\text{O}_3$  ( $\text{M} + \text{H}^+$ ): 365.2799; found: 365.2802.

#### 2-D-3-(4-((Diethylcarbamoyl)oxy)butoxy)phenyl trifluoromethanesulfonate (4c-D)

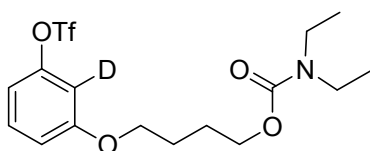

Pale yellow oil (25.4 mg, 61%).  $^1\text{H}$  NMR (400 MHz,  $\text{CDCl}_3$ )  $\delta$  = 7.32 (t,  $J$  = 8.4 Hz, 1 H), 6.91 (d,  $J$  = 8.4 Hz, 1 H), 6.85 (d,  $J$  = 8.0 Hz, 1 H), 6.80 (s, 0.07 H), 4.16 (t,  $J$  = 6.0 Hz, 2 H), 4.01 (t,  $J$  = 6.0 Hz, 2 H), 3.27 (s, 4 H), 1.92 – 1.80 (m, 4 H), 1.12 (t,  $J$  = 7.1 Hz, 6 H).  $^{13}\text{C}$  NMR (100 MHz,  $\text{CDCl}_3$ )  $\delta$  = 160.2, 155.9, 150.1, 130.4, 118.7 ( $J$  = 318.7 Hz), 114.6, 113.1, 68.0, 64.4, 41.7, 41.2, 25.8, 13.9, 13.6.  $^{19}\text{F}$  NMR (376 MHz,  $\text{CDCl}_3$ )  $\delta$  = -72.96. IR (KBr) = 2966, 2933, 1699, 1607, 1471, 1425, 1272, 1215, 1174, 1143, 1066, 1019, 854, 788, 606, 511  $\text{cm}^{-1}$ . HRMS-ESI ( $m/z$ ): calcd for  $\text{C}_{16}\text{H}_{21}\text{DF}_3\text{NNaO}_6\text{S}$  ( $\text{M} + \text{Na}^+$ ): 437.1075; found: 437.1074.

#### References:

1. L. Li, D. Qiu, J. Shi, Y. Li, *Org. Lett.* 2016, **18**, 3726.

# I. NMR Spectra.

## 3-(4-((Diethylcarbamoyl)oxy)butoxy)phenyl trifluoromethanesulfonate (4c)

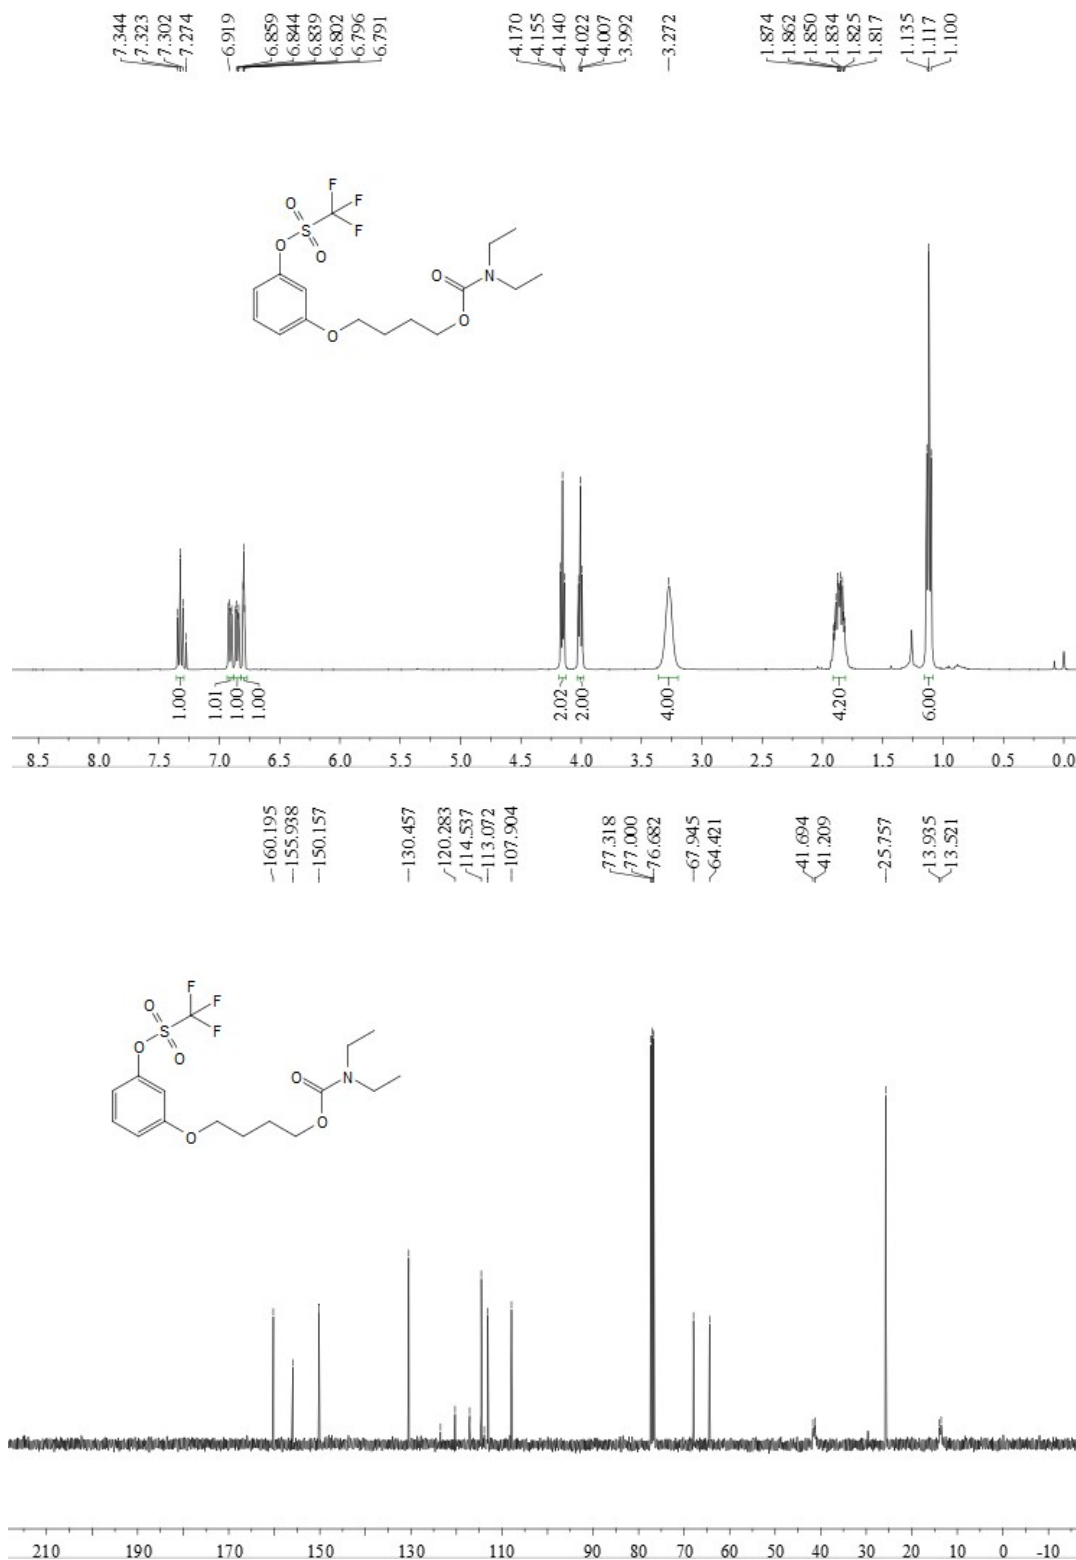

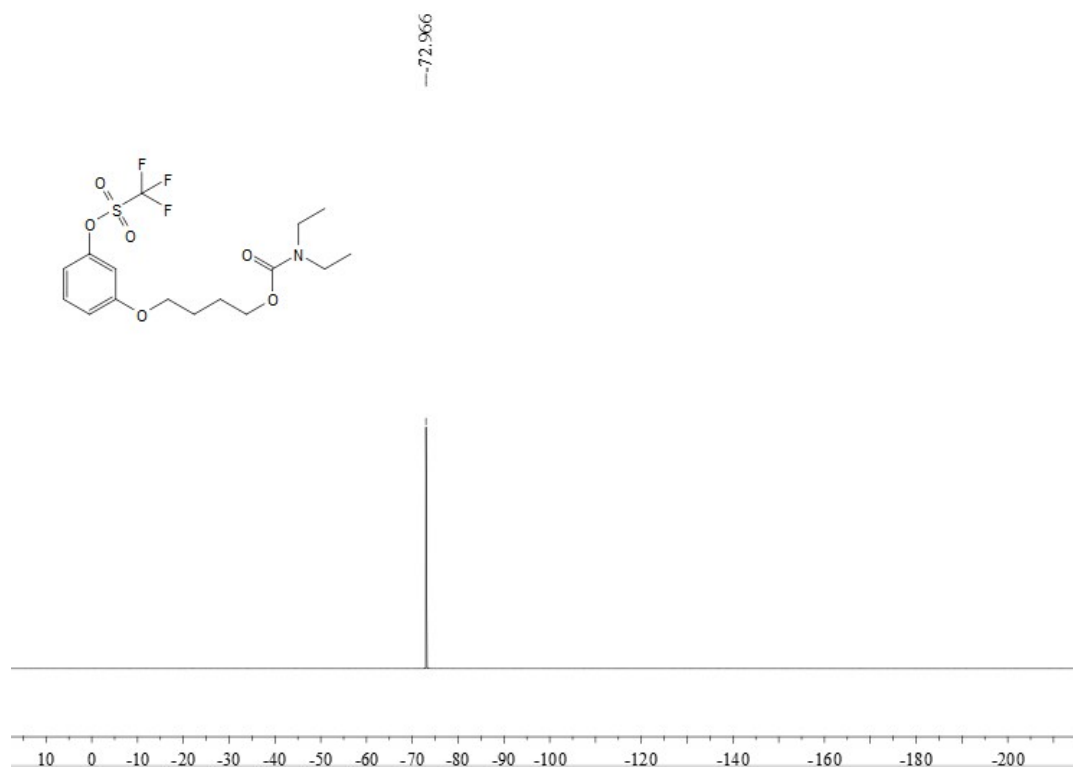

**3-(4-((Dimethylcarbamoyloxy)butoxy)phenyl trifluoromethanesulfonate (4d)**

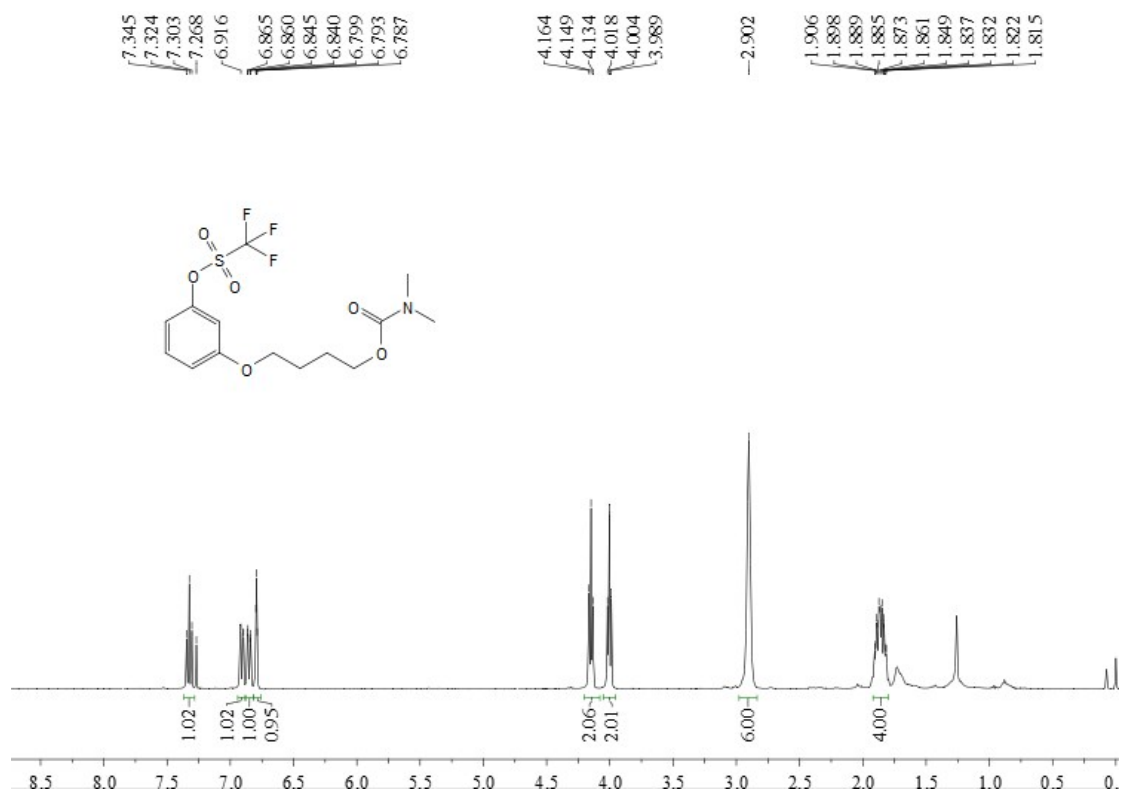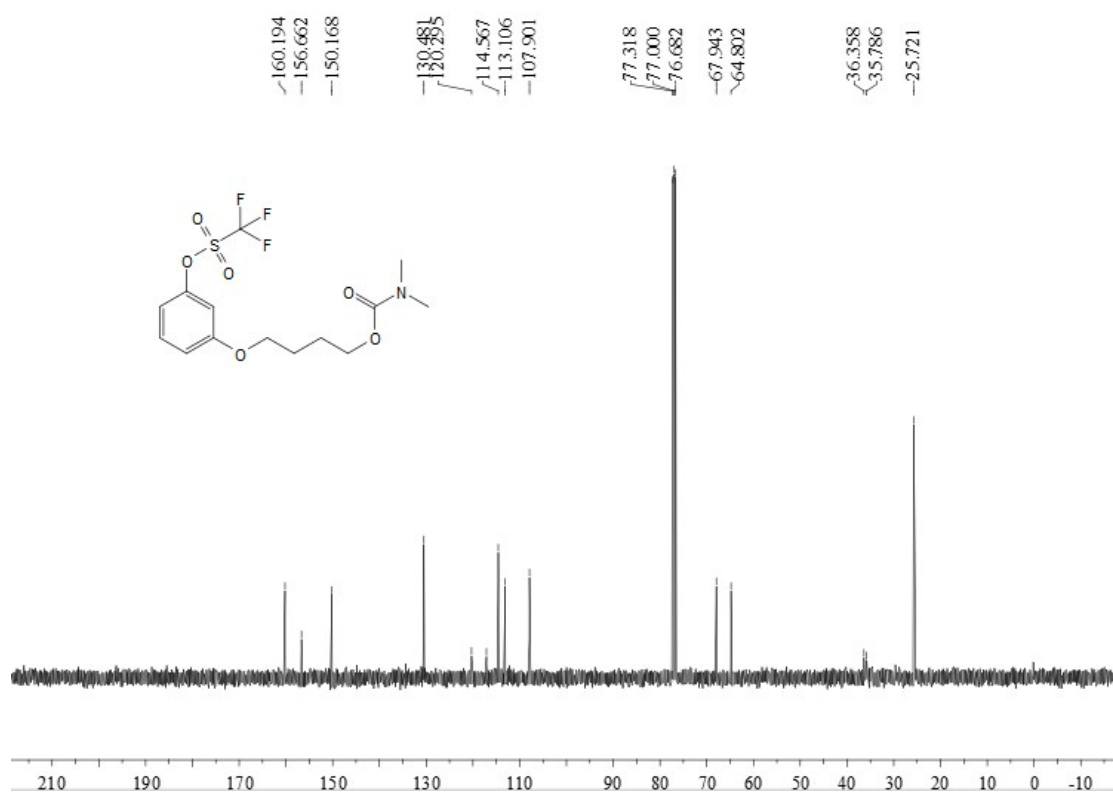

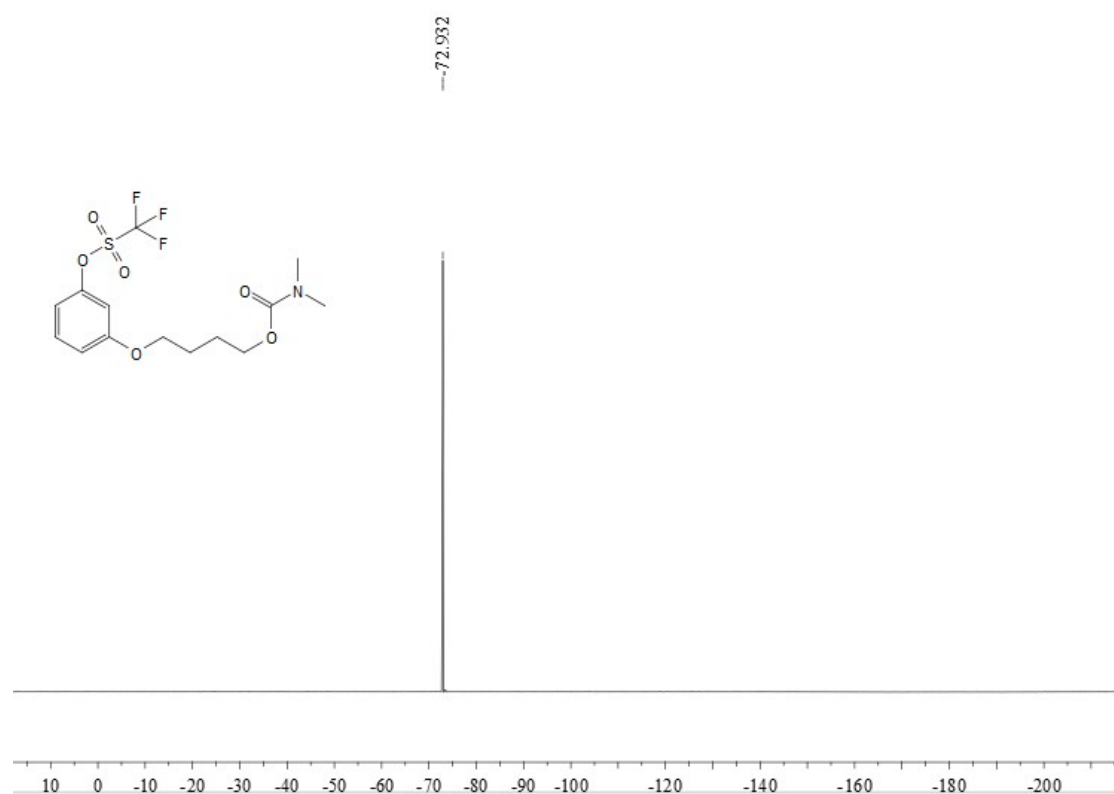

**3-((4-((Dipropylcarbamoyl)oxy)butoxy)phenyl trifluoromethanesulfonate (4e)**

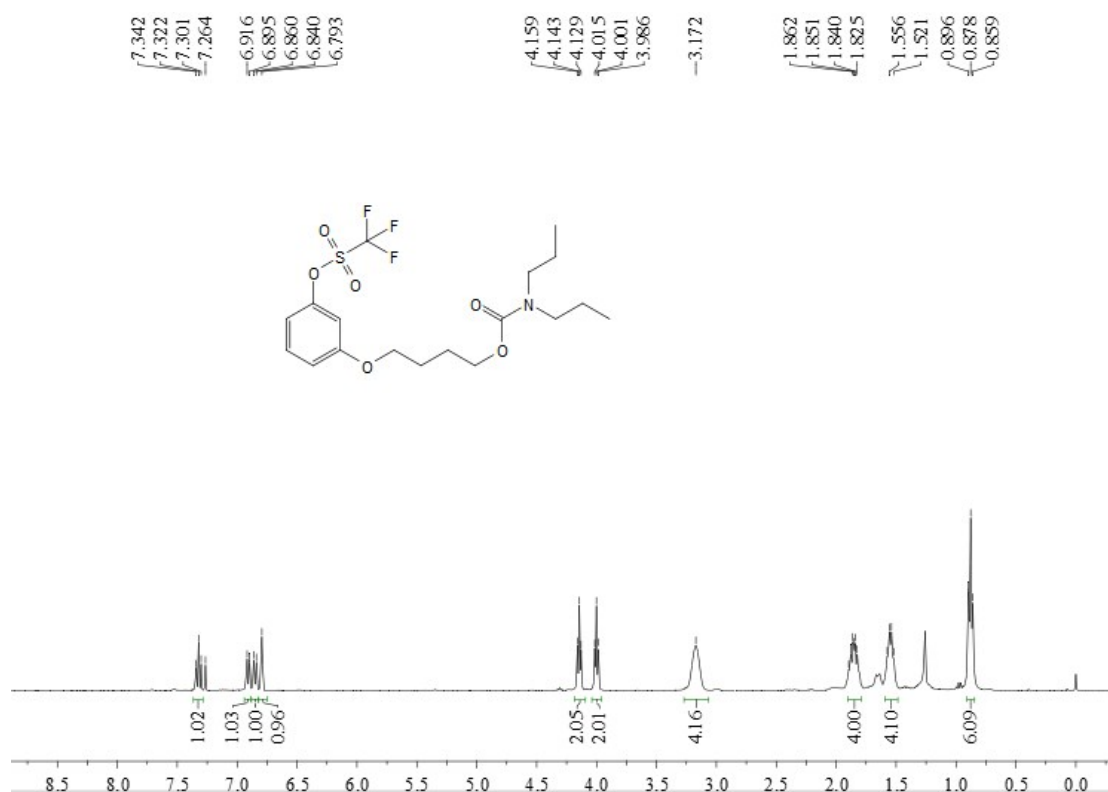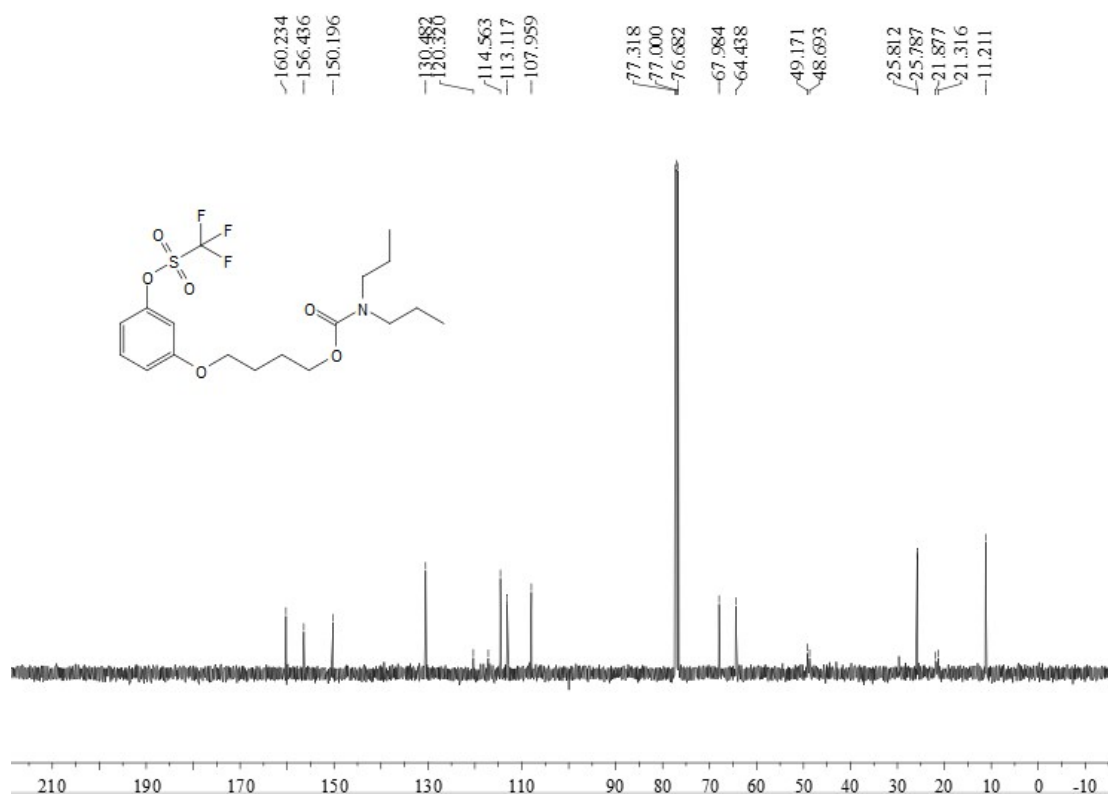

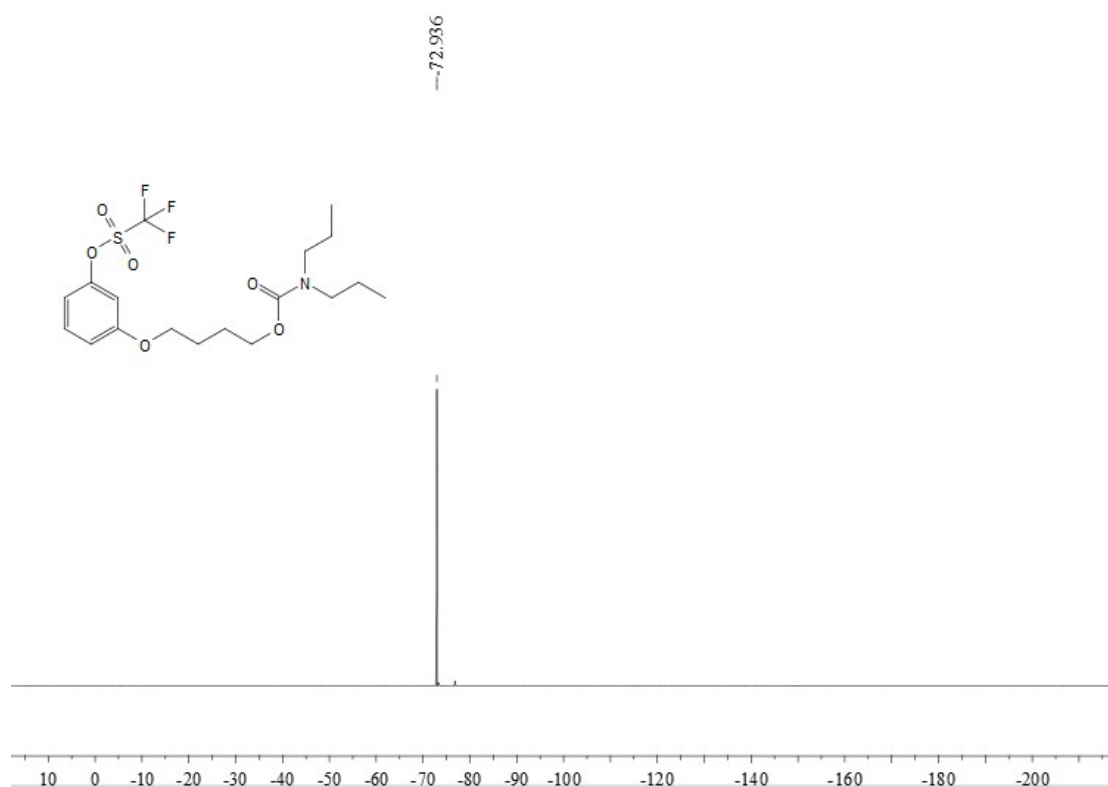



3-(4-((Dibutylcarbamoyl)oxy)butoxy)phenyl trifluoromethanesulfonate (4f)

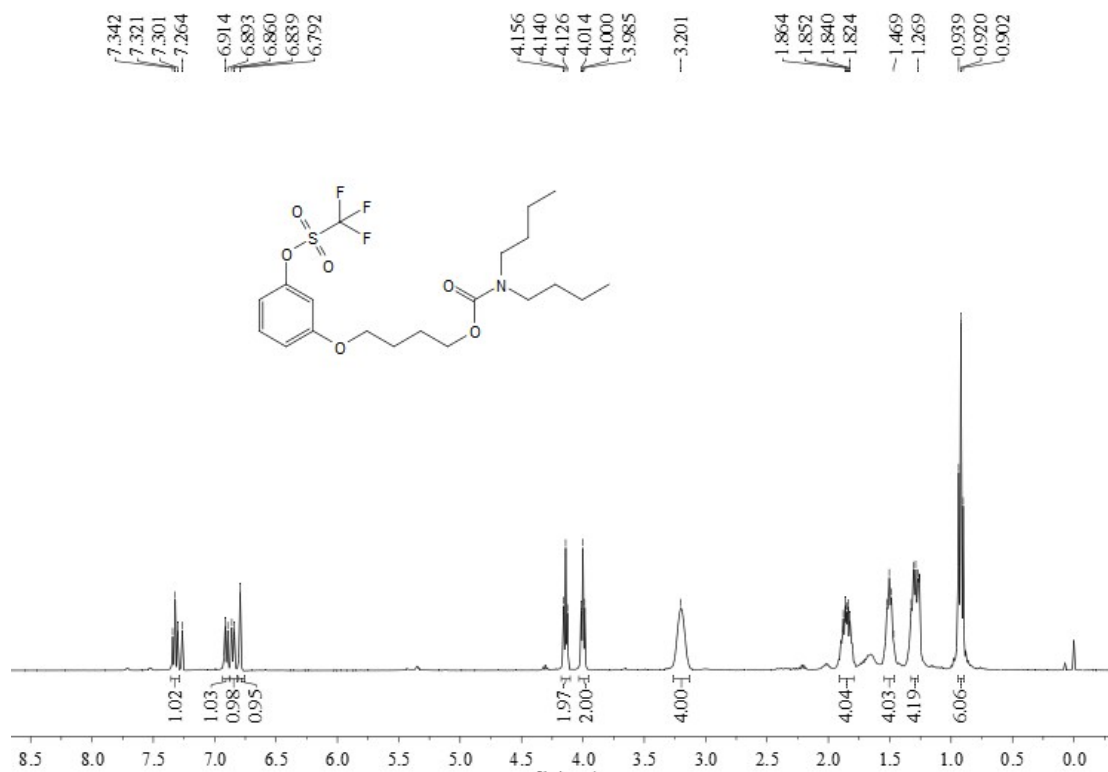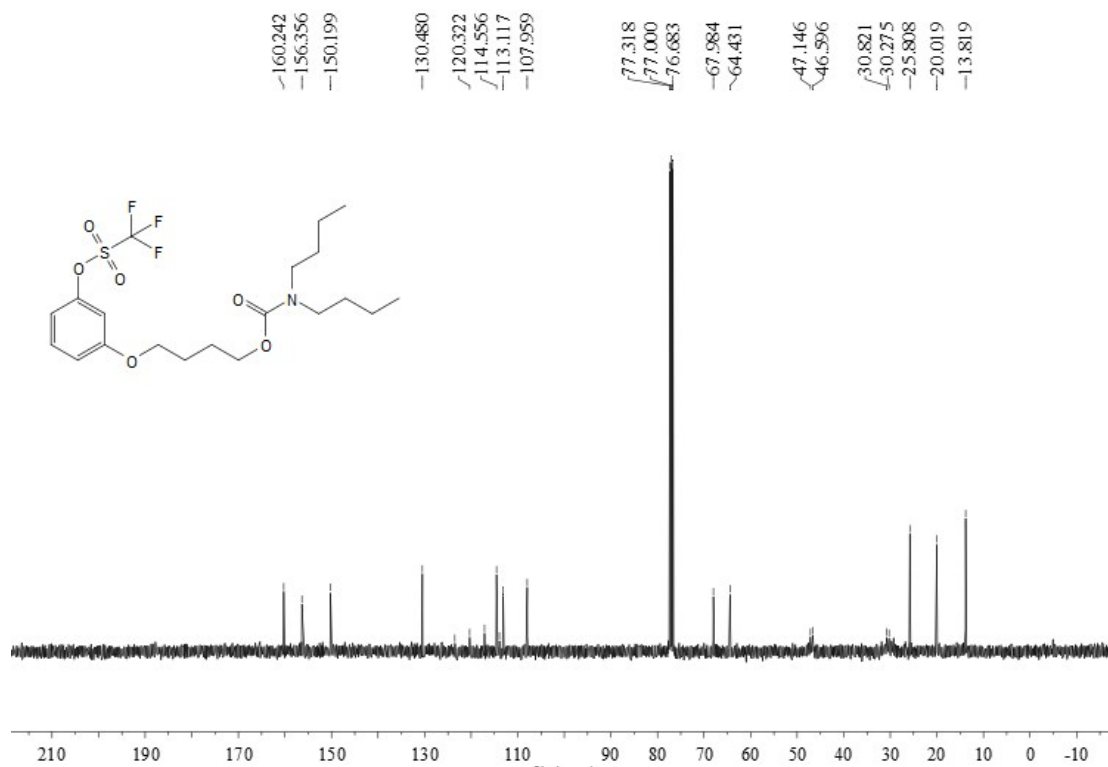

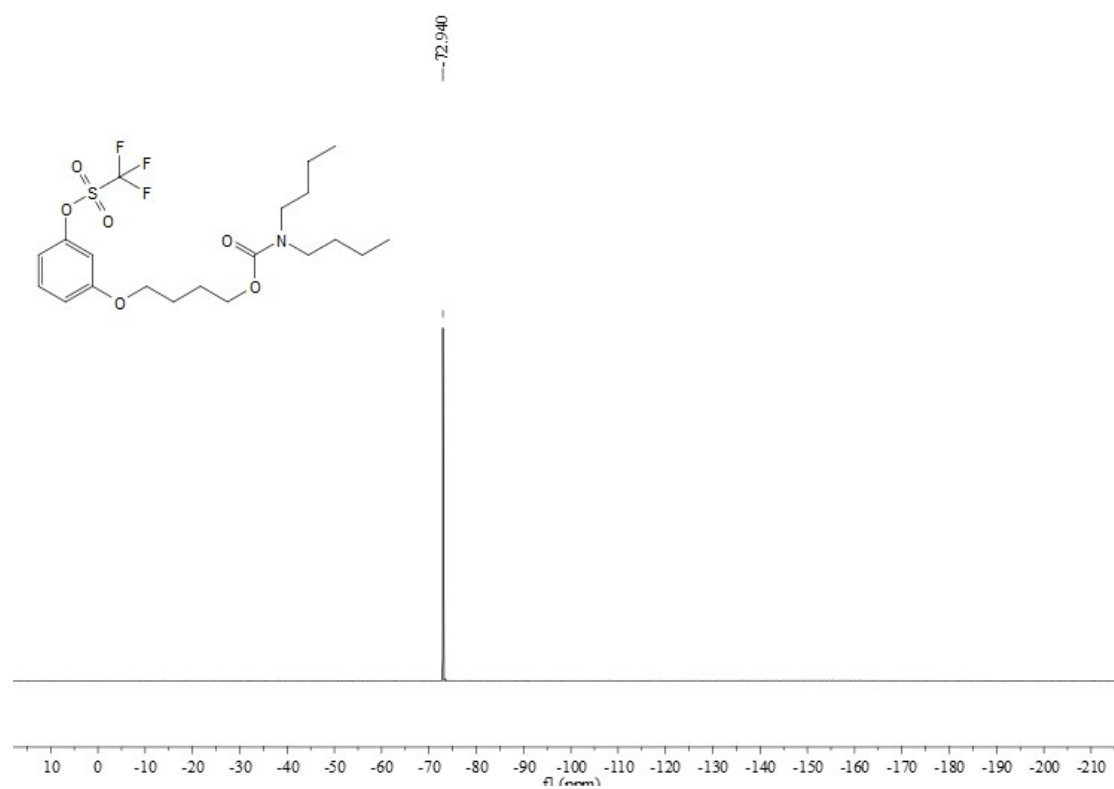

**3-(4-((Methyl(propyl)carbamoyl)oxy)butoxy)phenyl trifluoromethanesulfonate (4g)**

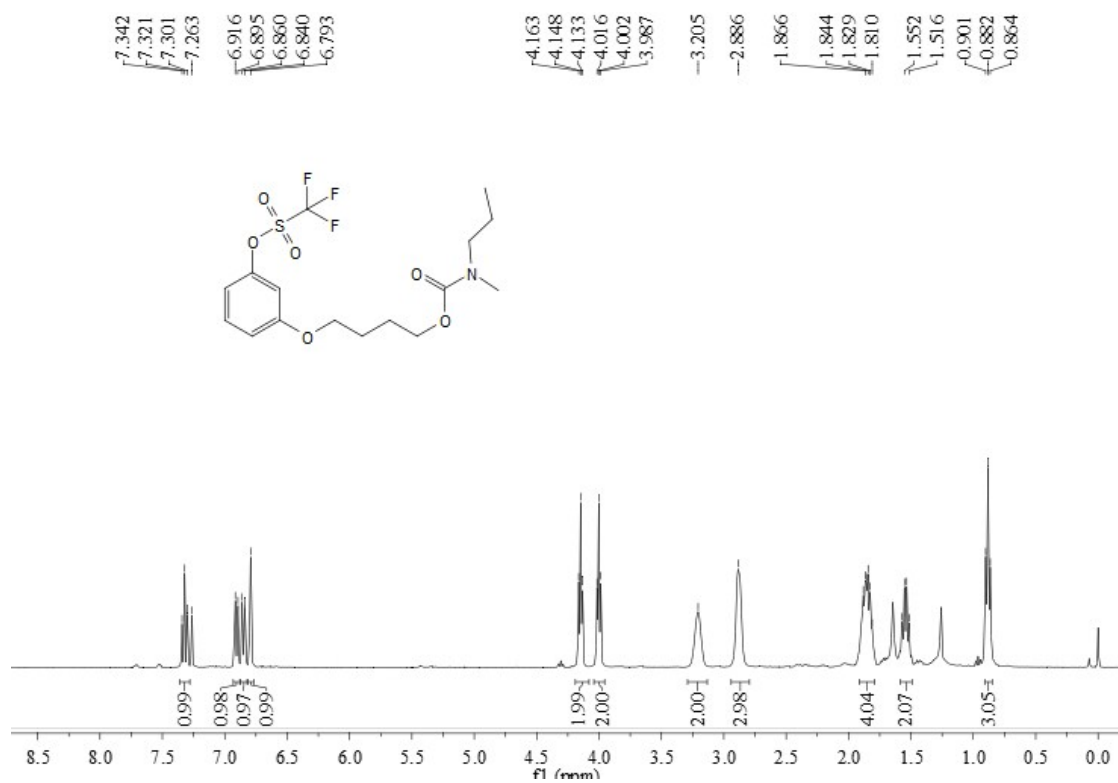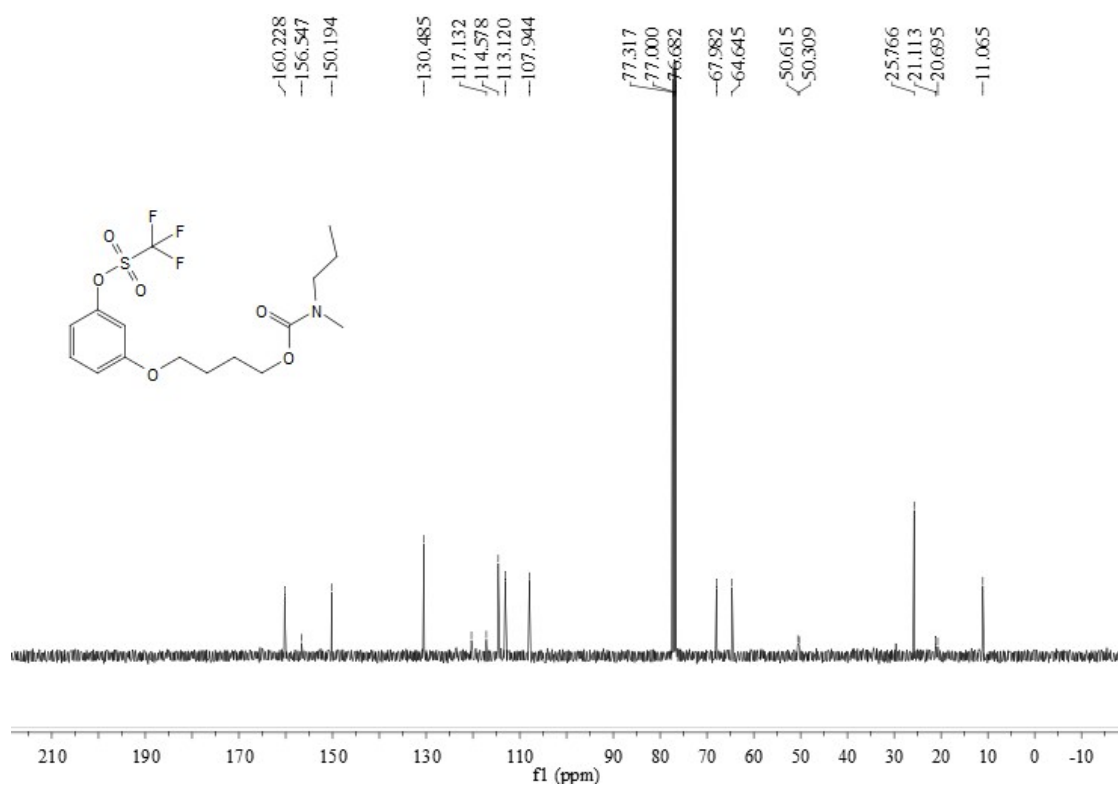

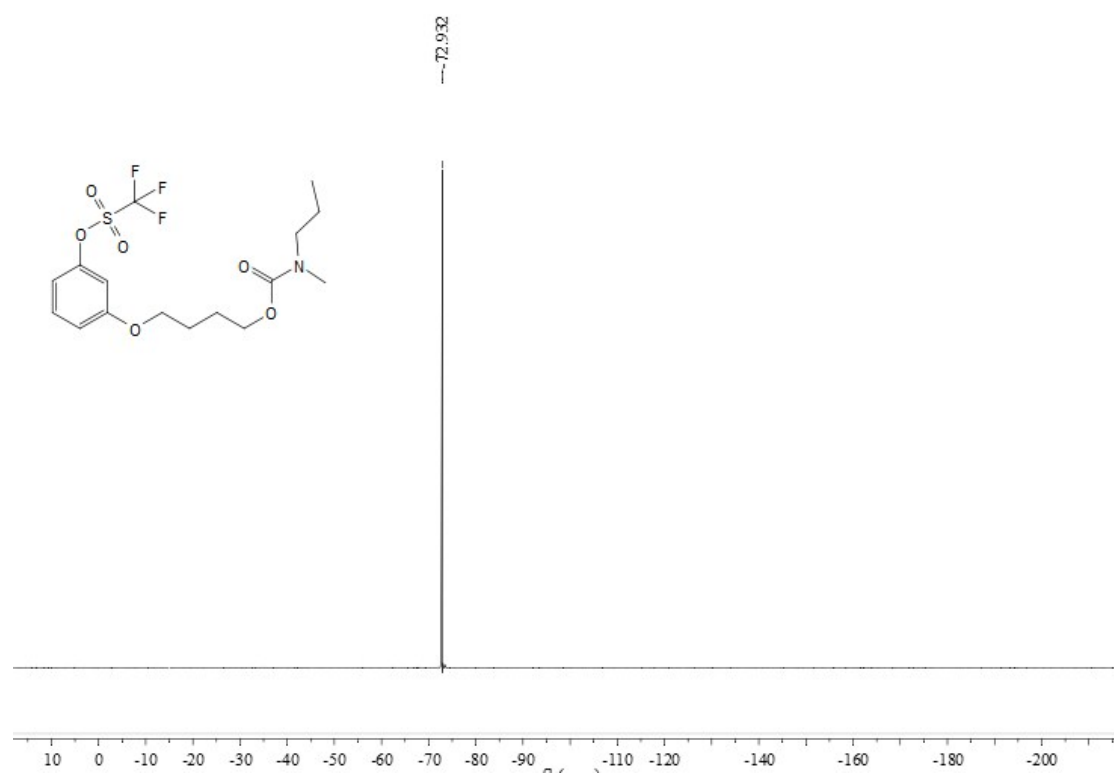

**3-(4-((Benzyl(methyl)carbamoyl)oxy)butoxy)phenyl trifluoromethanesulfonate (4h)**

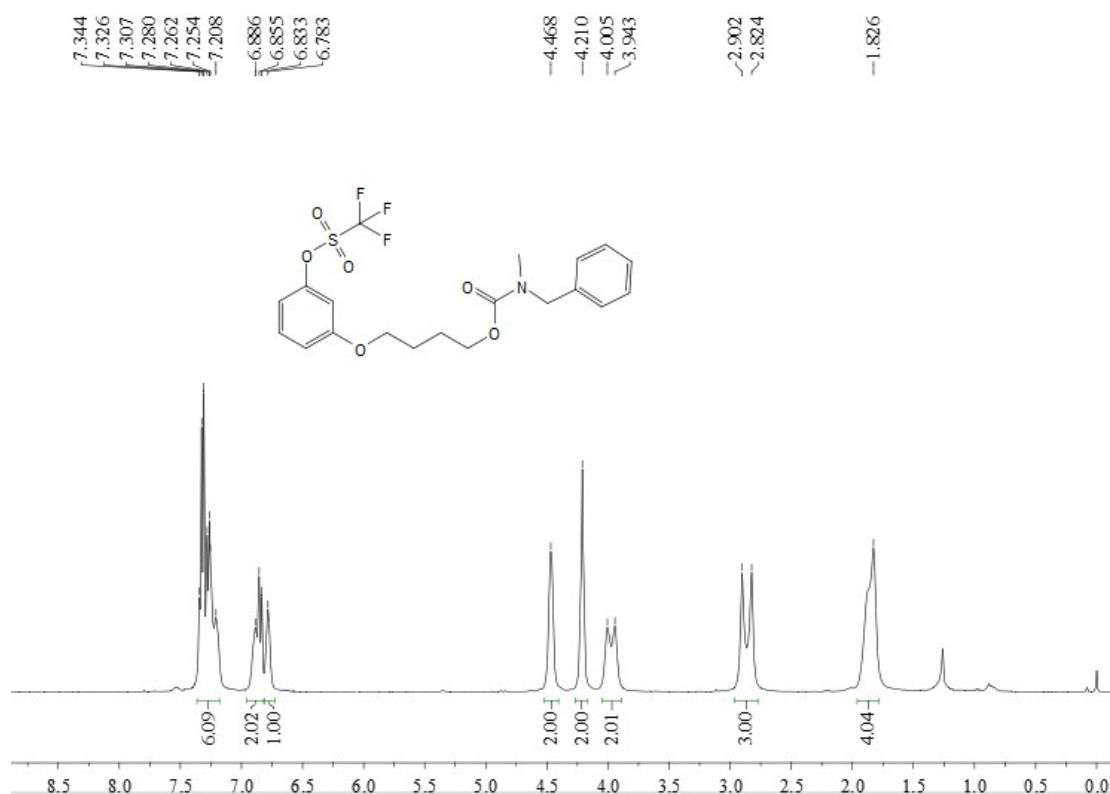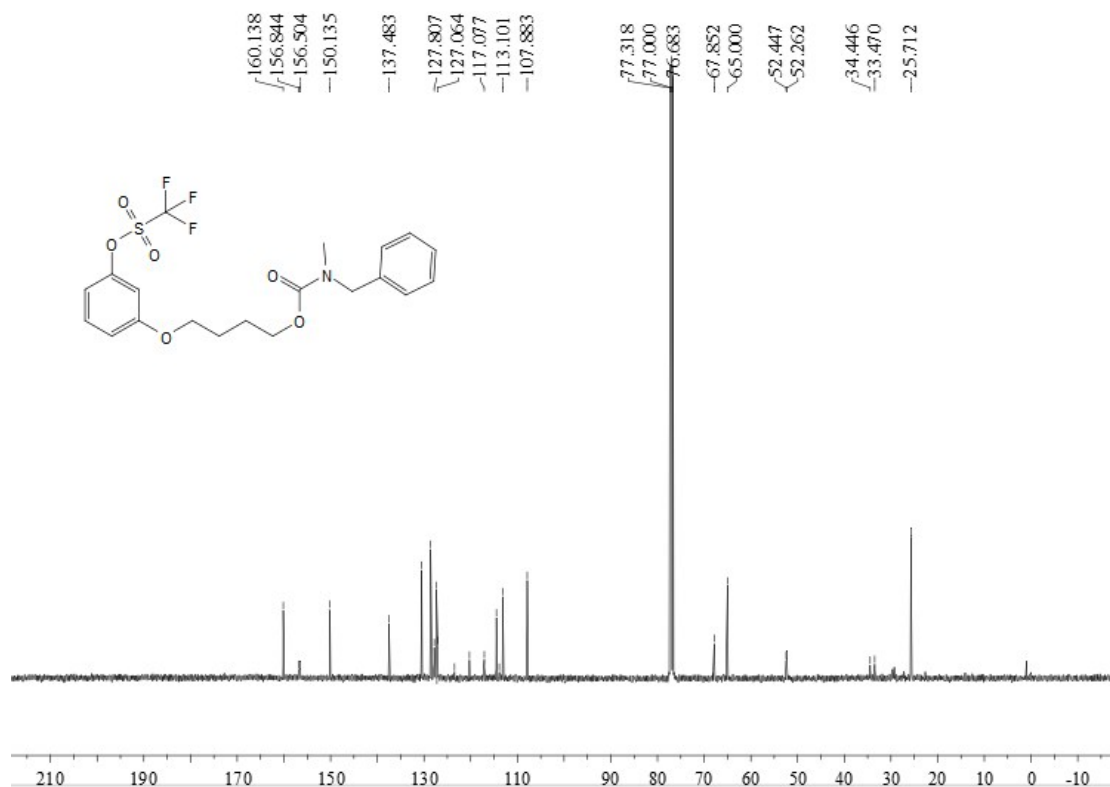

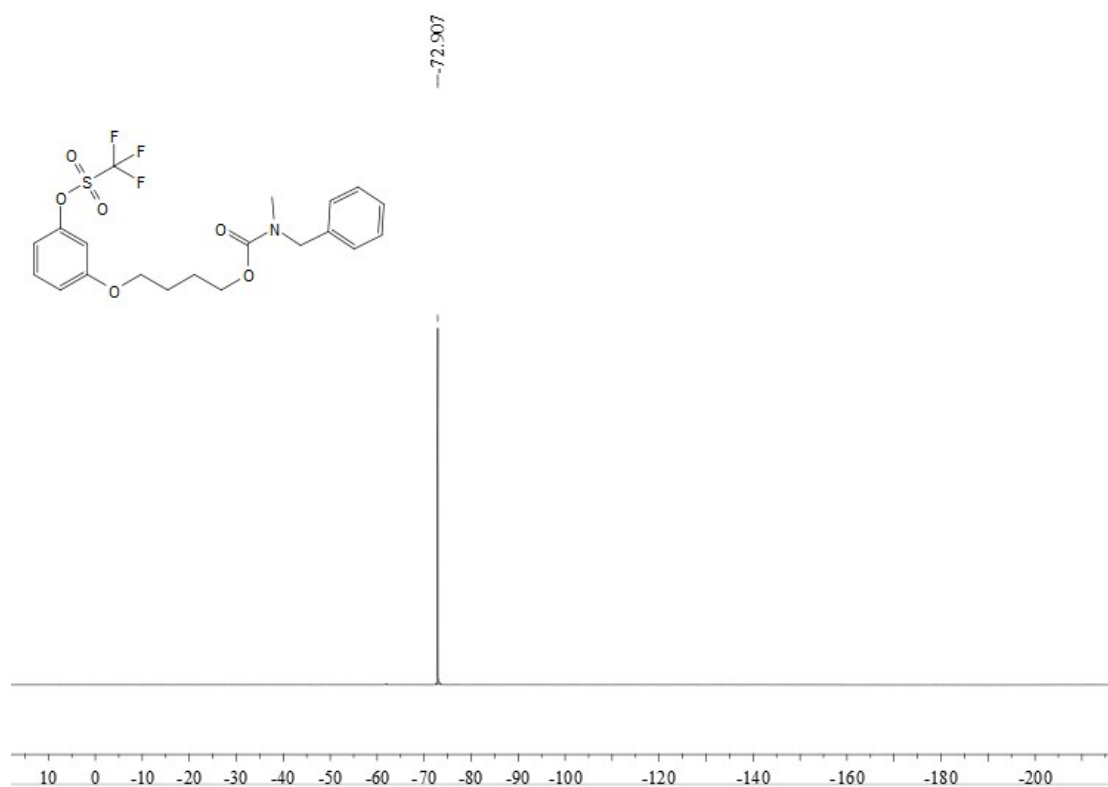

4-(3-(((Trifluoromethyl)sulfonyl)oxy)phenoxy)butyl piperidine-1-carboxylate (4i)

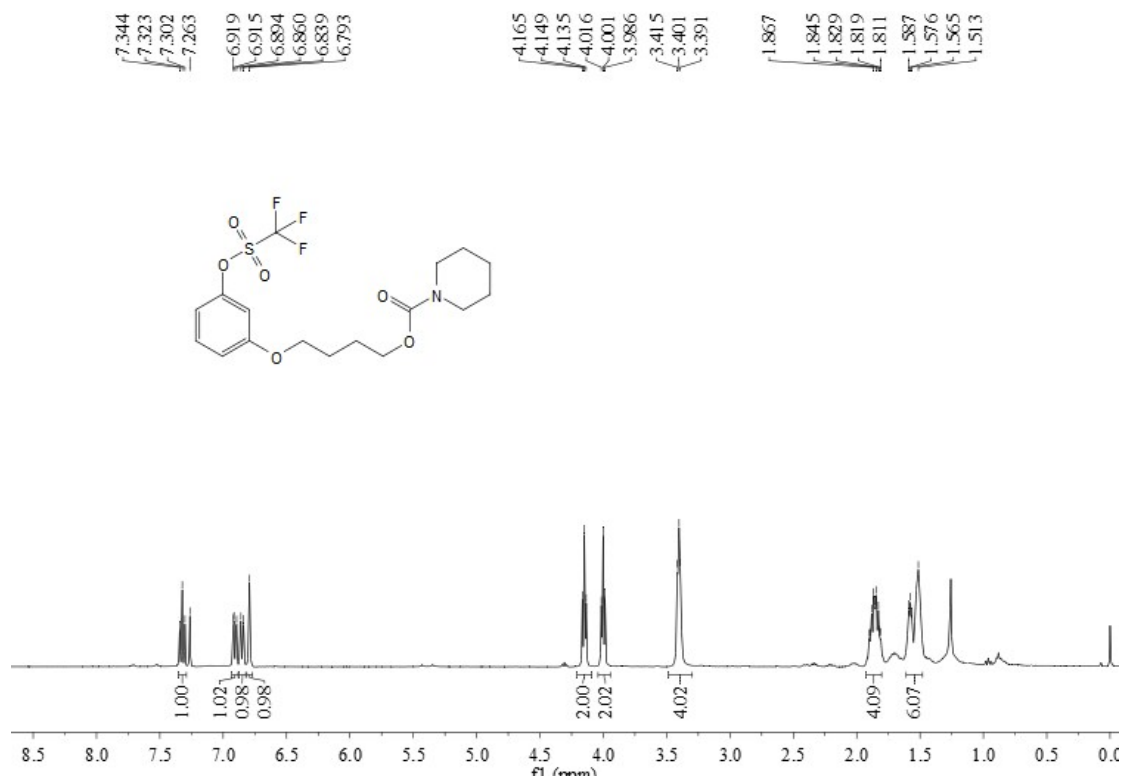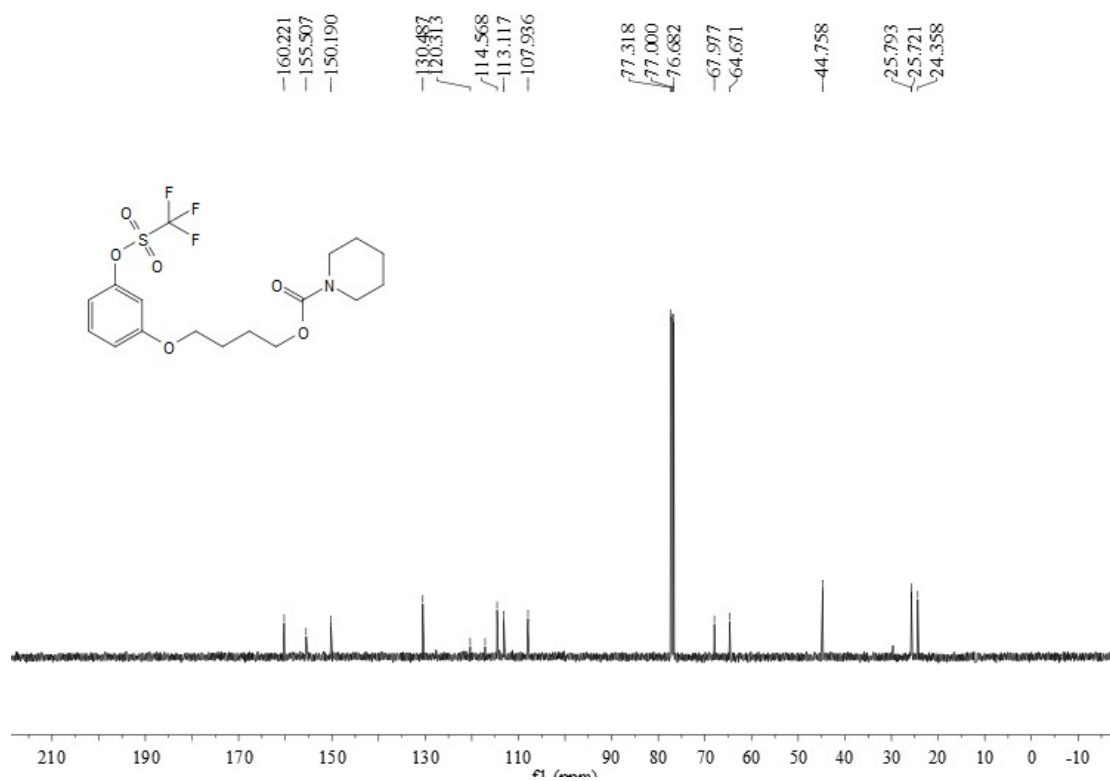

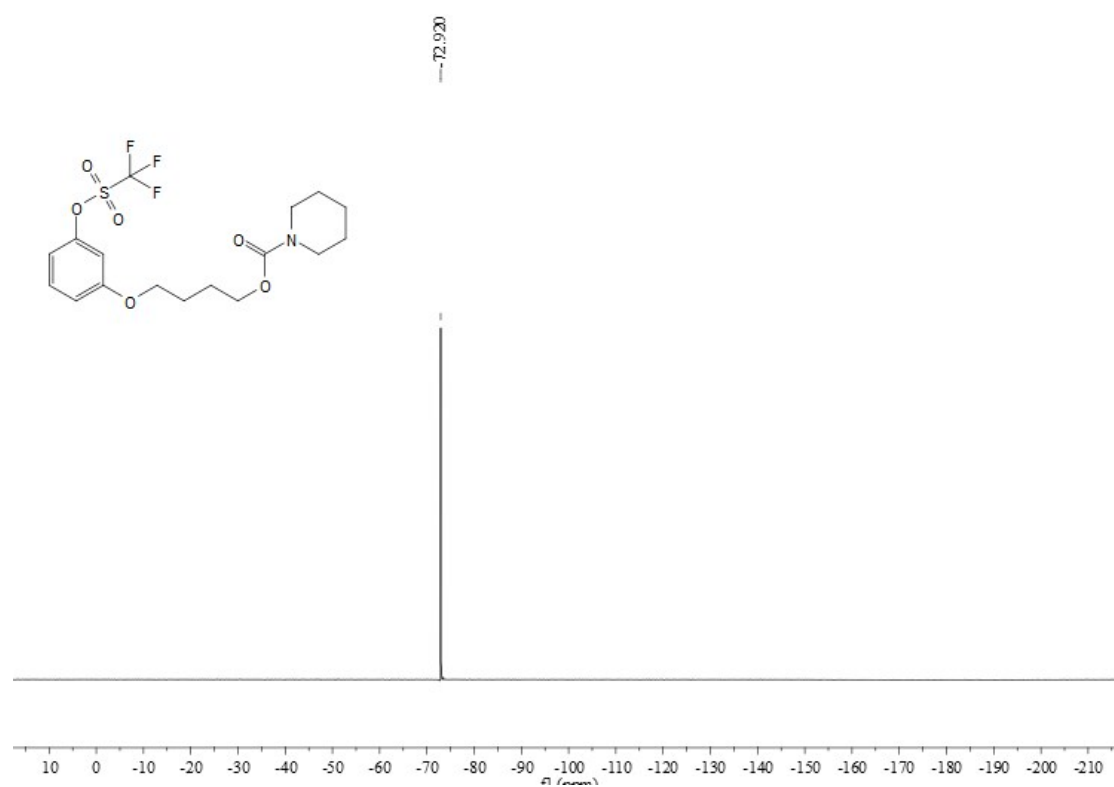



**4-(3-(((Trifluoromethyl)sulfonyl)oxy)phenoxy)butyl azepane-1-carboxylate (4j)**

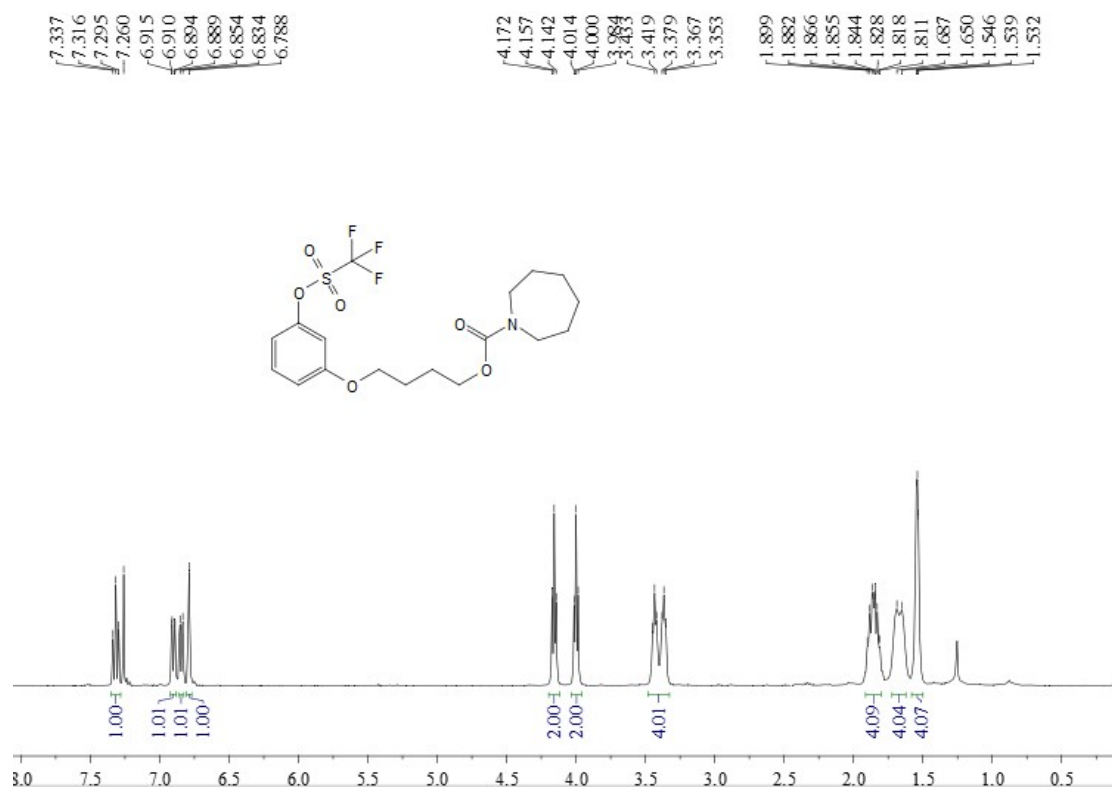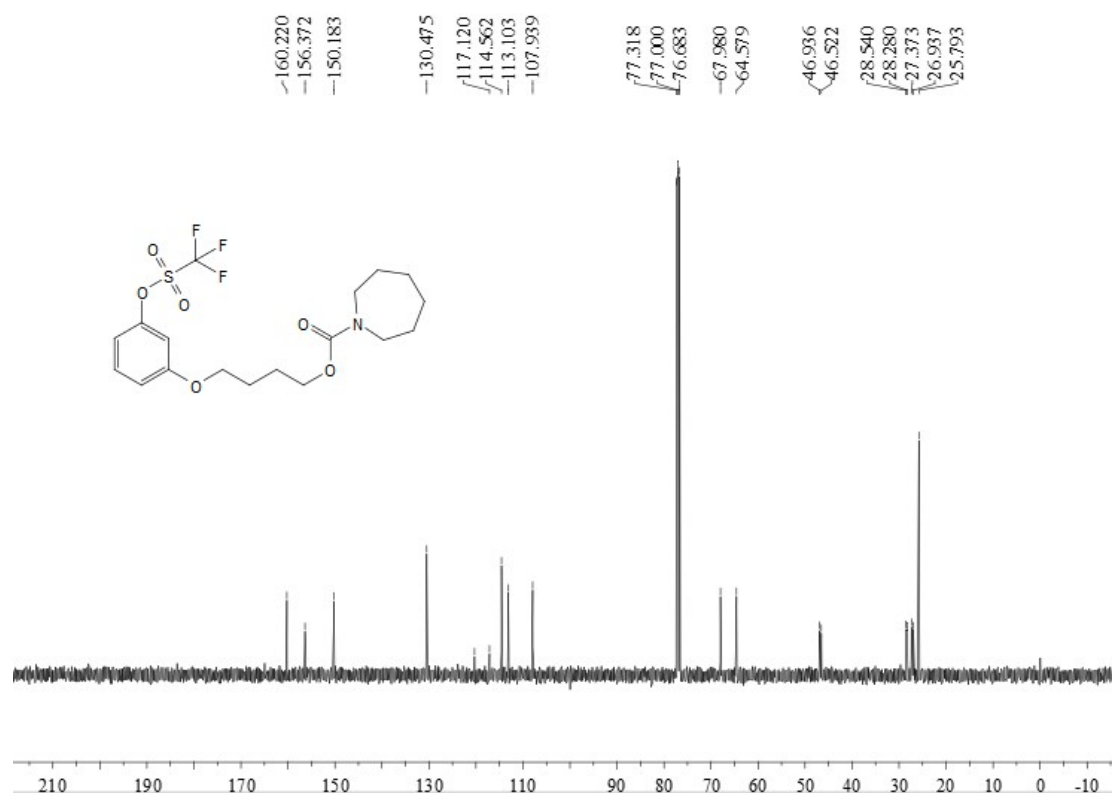

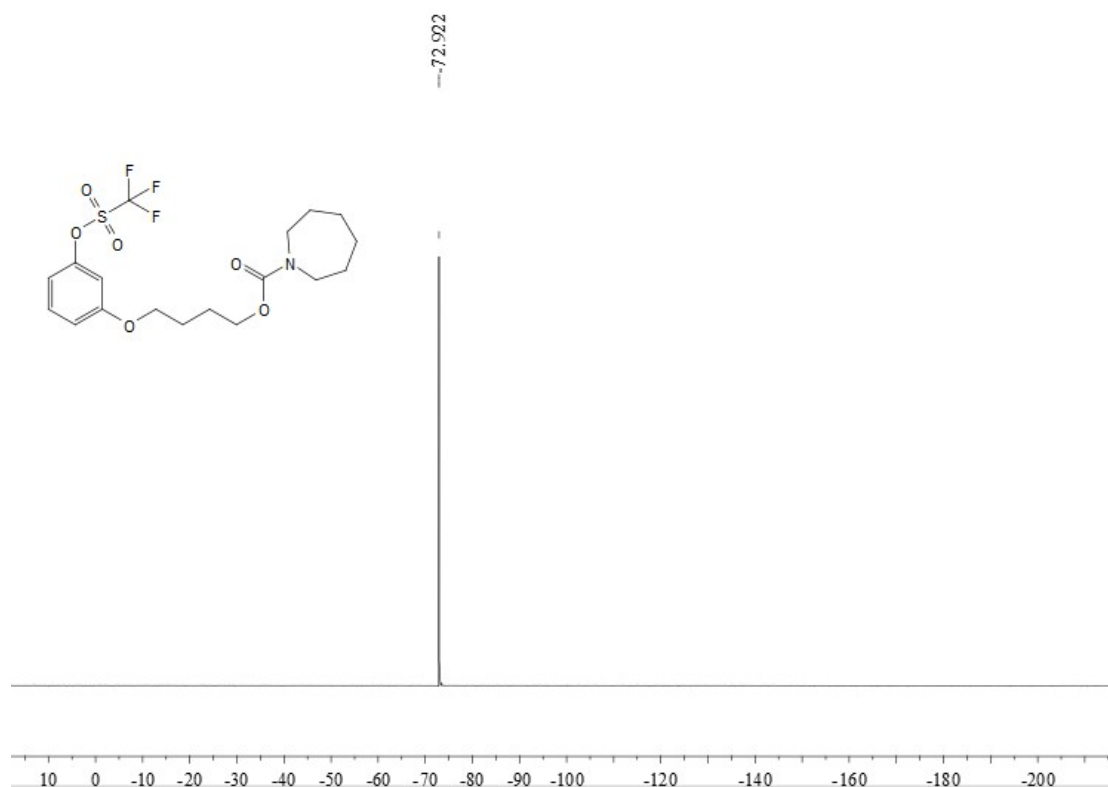

**3-(4-((Propylcarbamoyl)oxy)butoxy)phenyl trifluoromethanesulfonate (4k)**

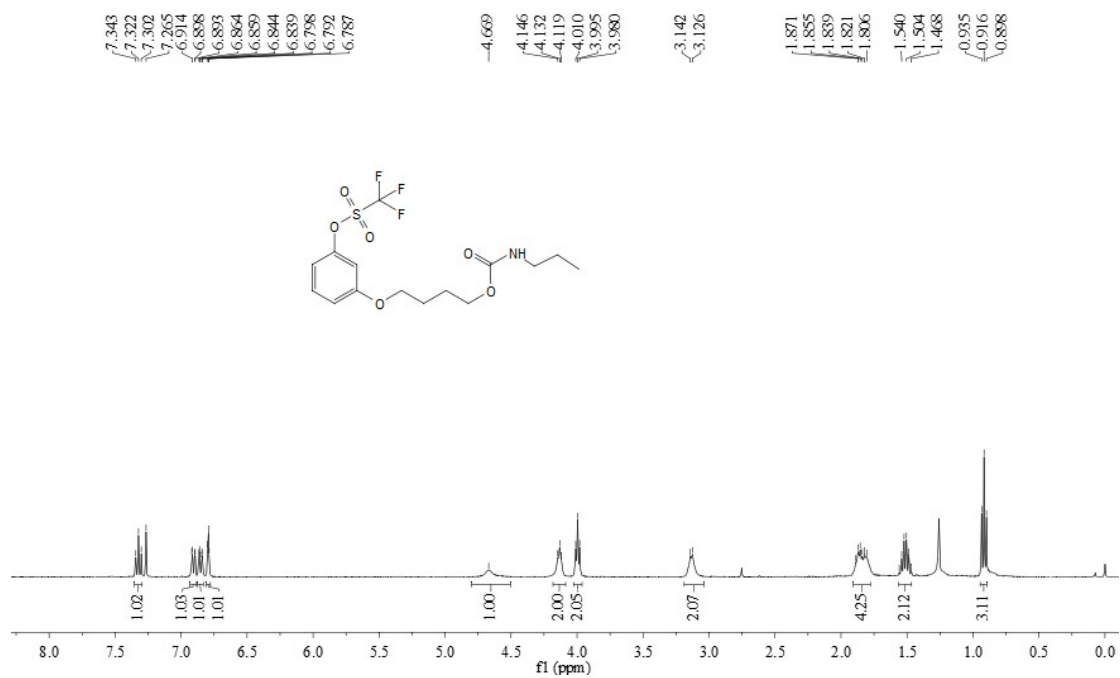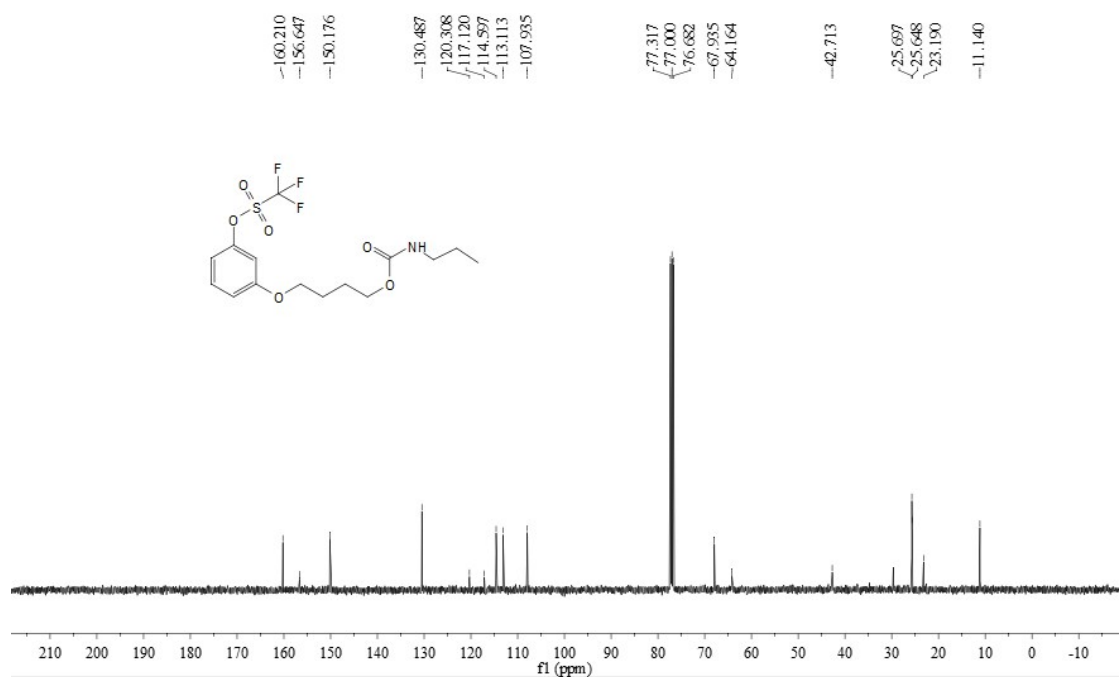

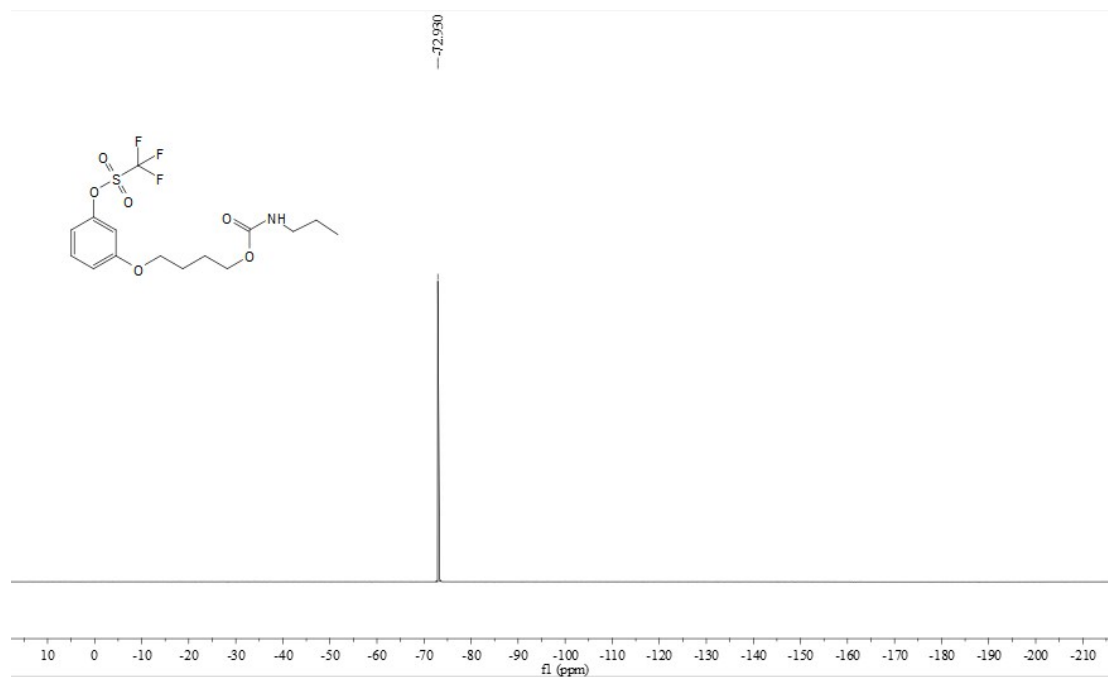

3-((Pentylcarbamoyl)oxy)butoxy)phenyl trifluoromethanesulfonate (4l)

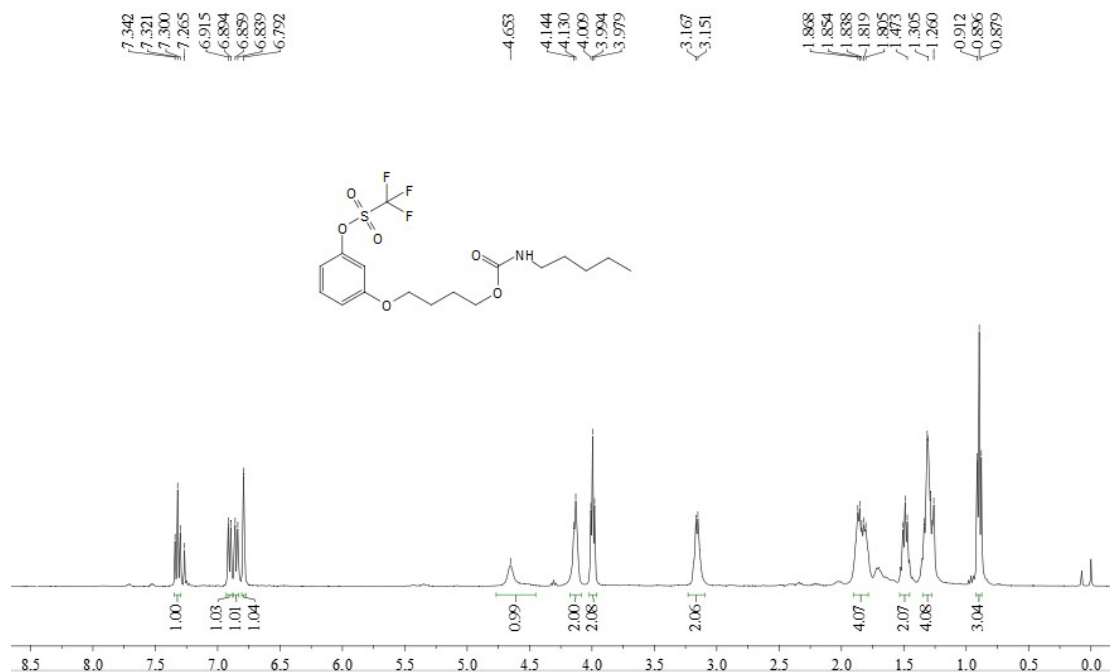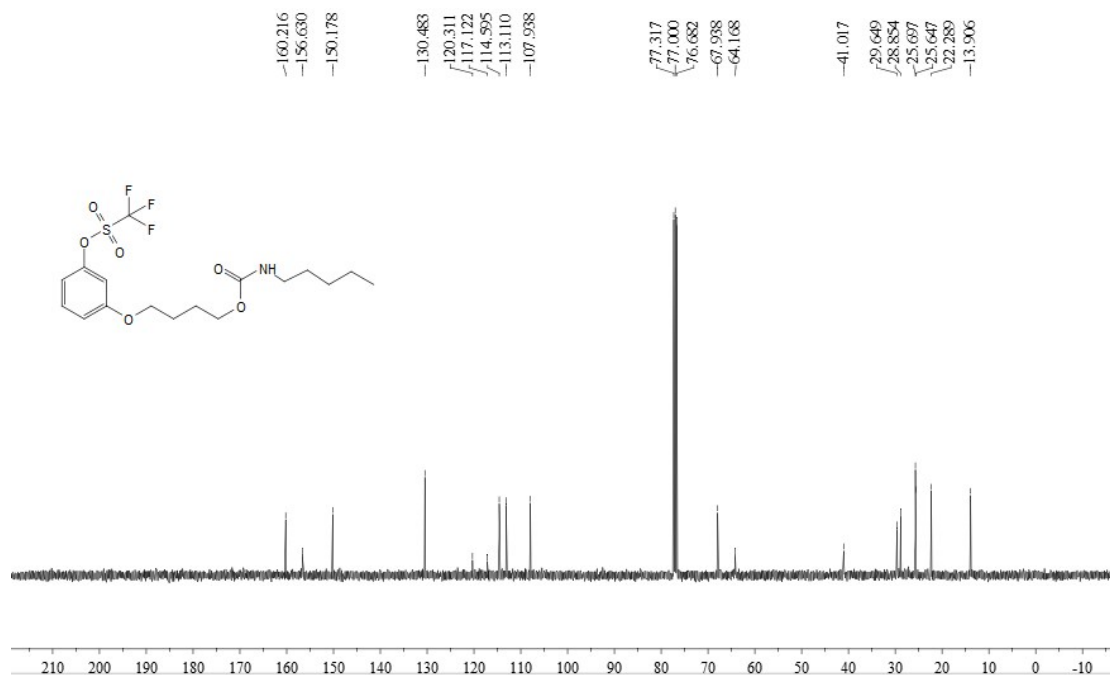

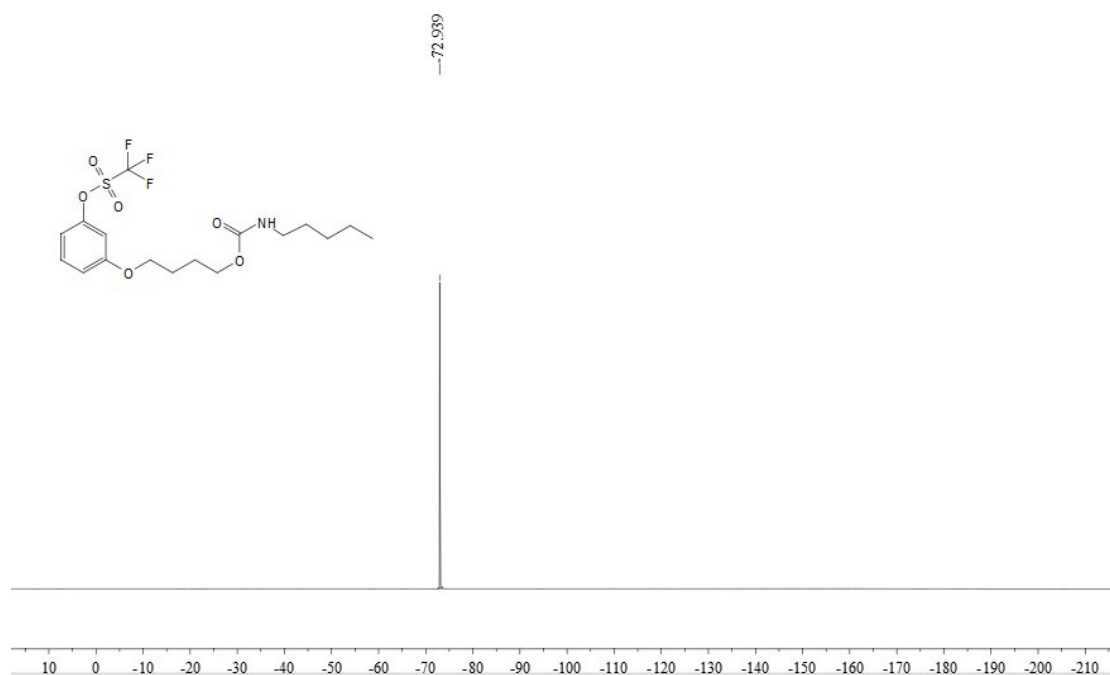

**3-((4-((Cyclopentylcarbamoyl)oxy)butoxy)phenyl trifluoromethanesulfonate (4m)**

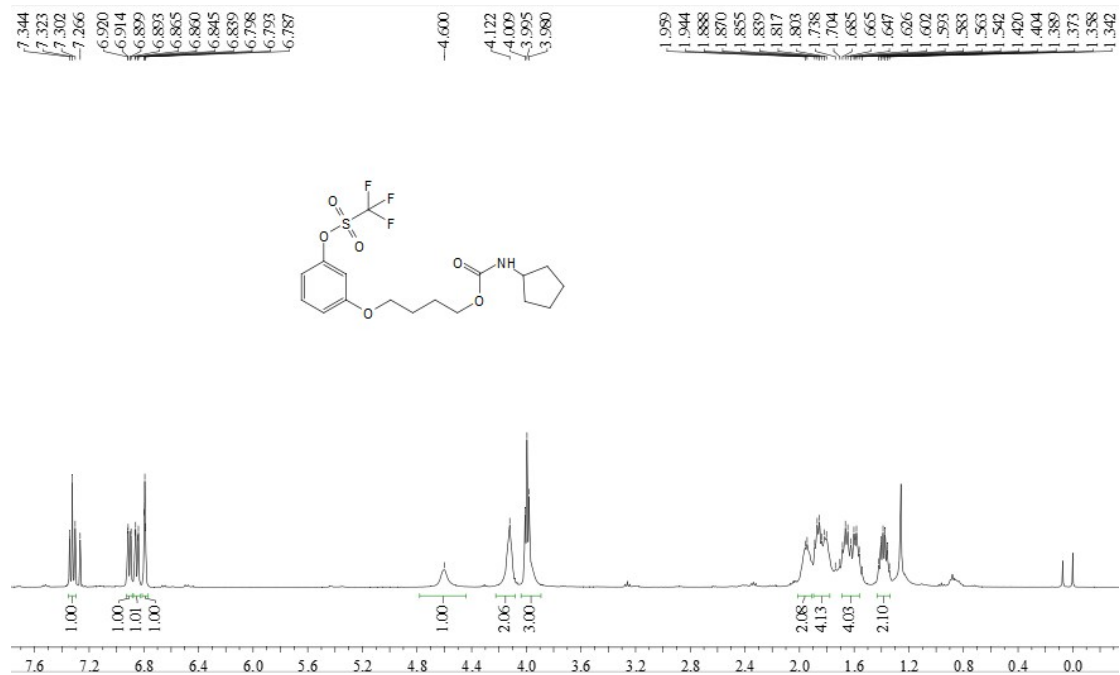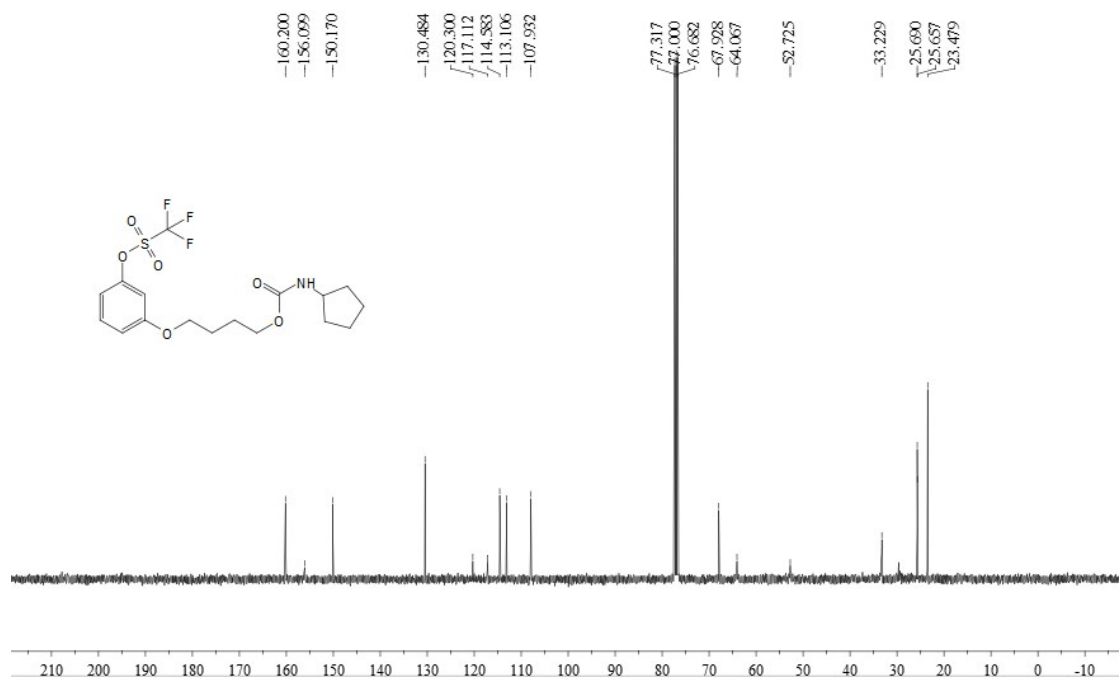

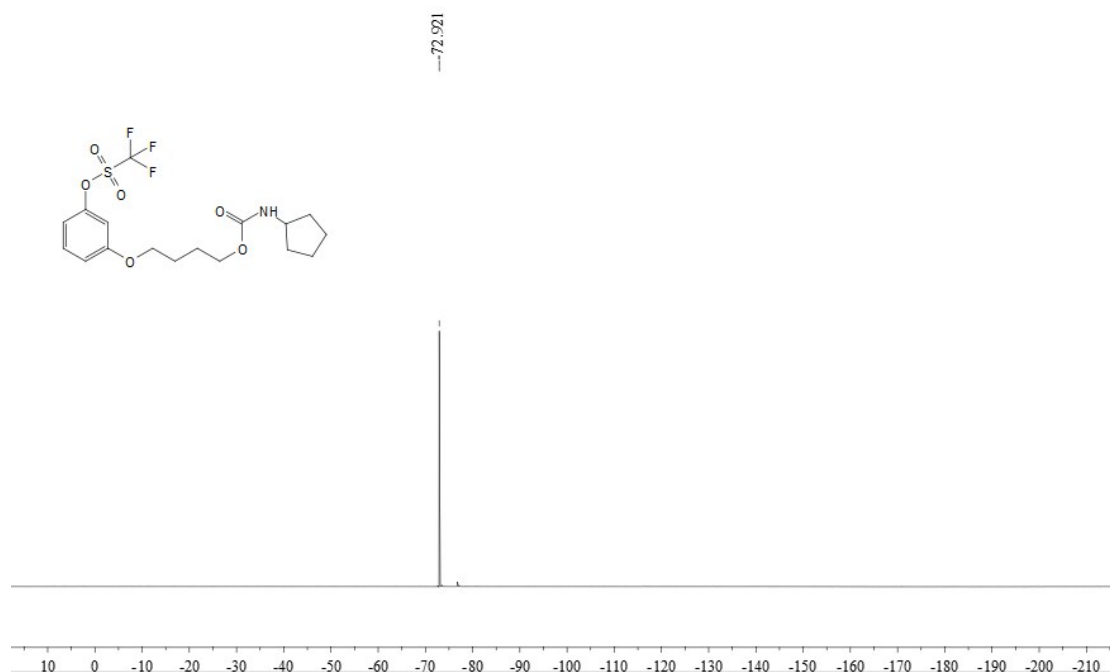

**3-(4-((Benzylcarbamoyl)oxy)butoxy)phenyl trifluoromethanesulfonate (4n)**



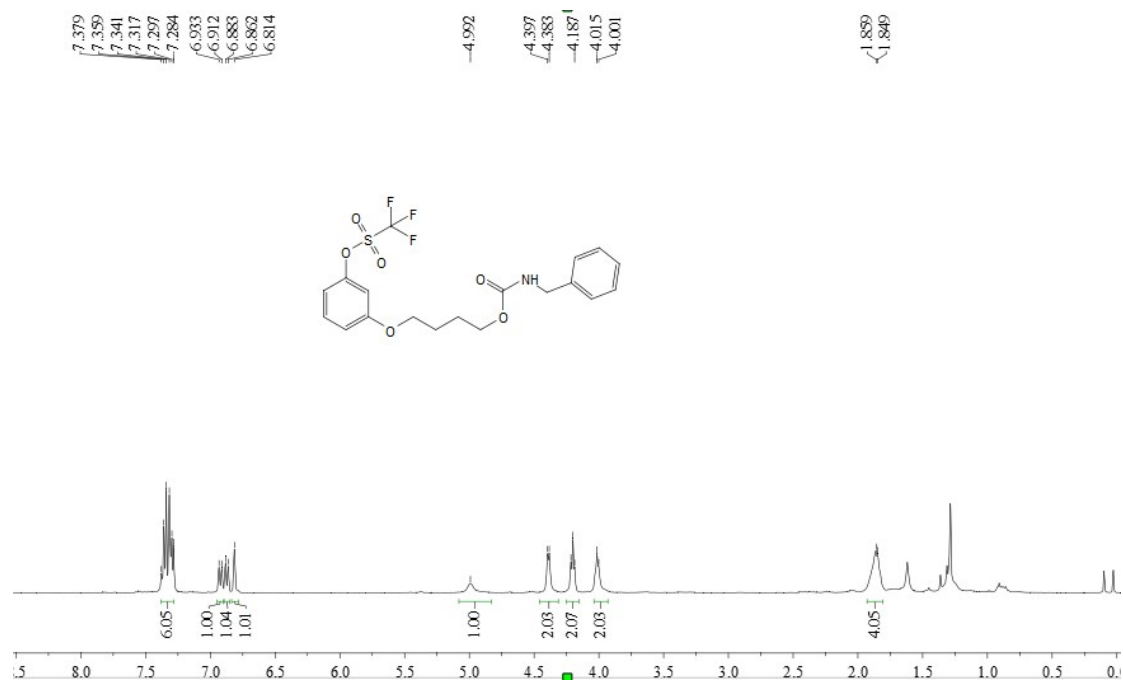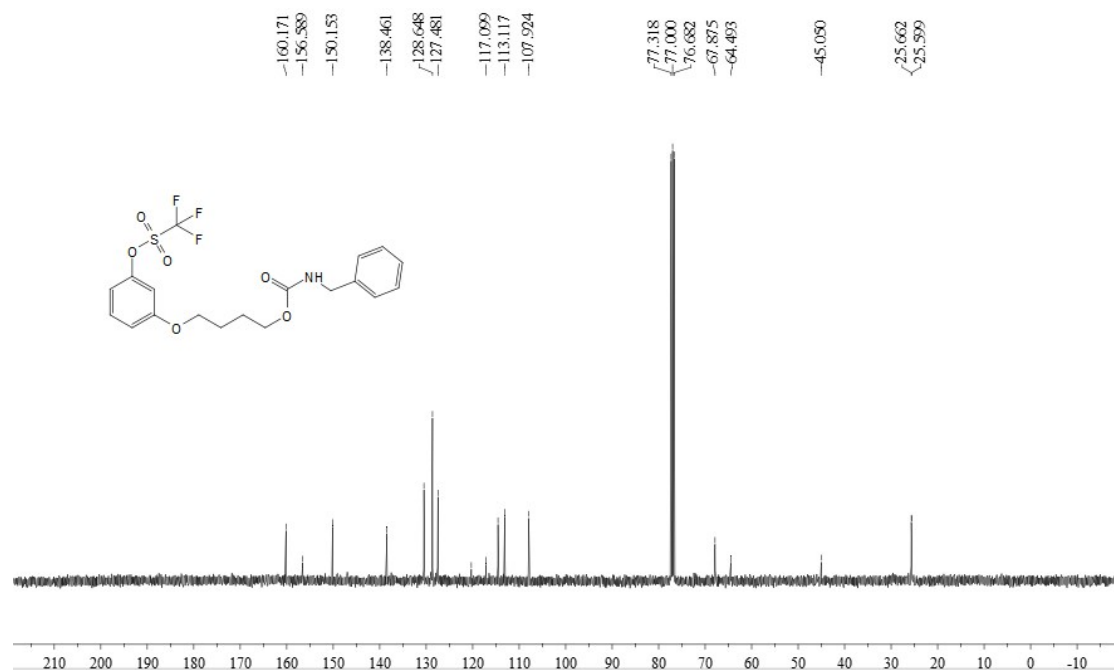

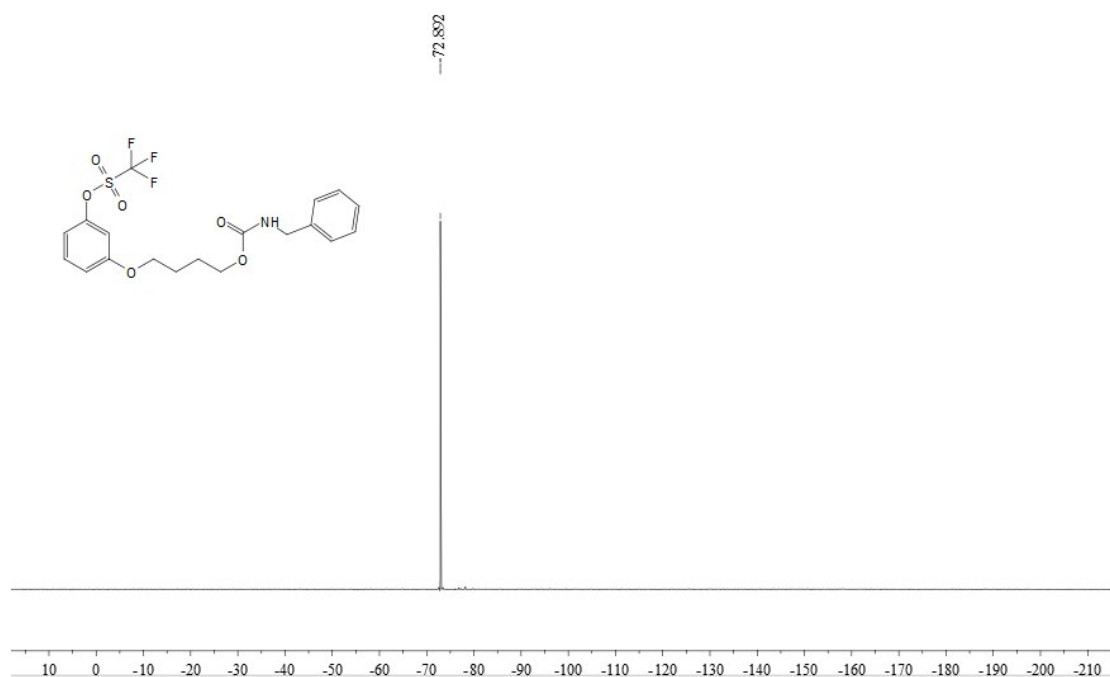

**(R)-3-(4-(((1-Phenylethyl)carbamoyl)oxy)butoxy)phenyl trifluoromethanesulfonate (4o)**

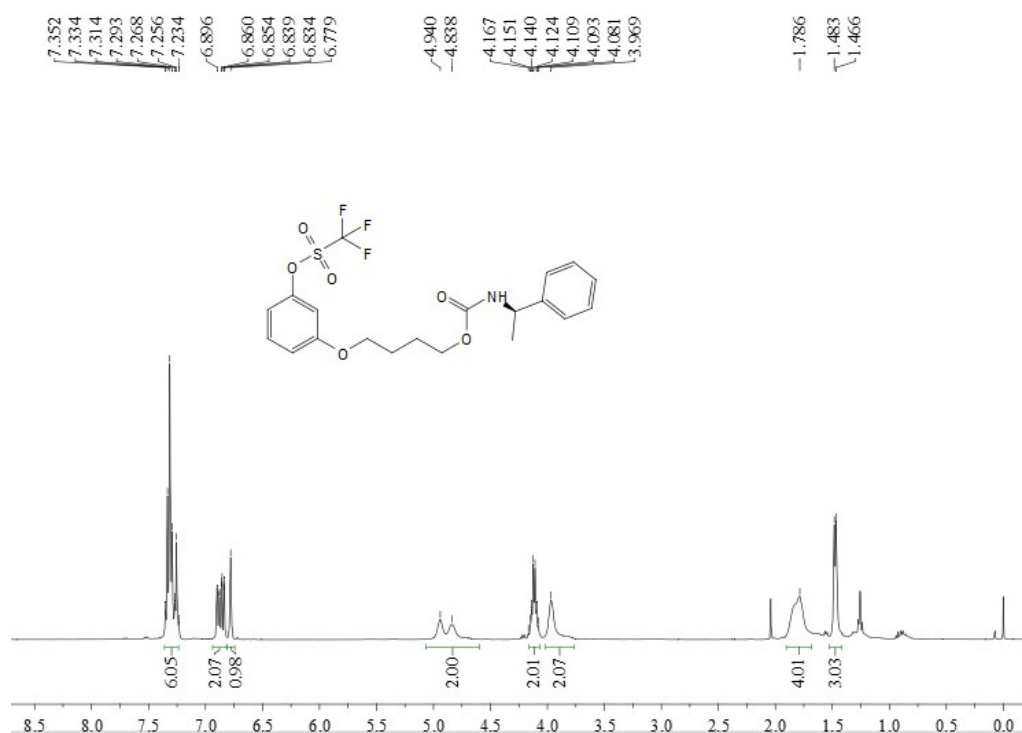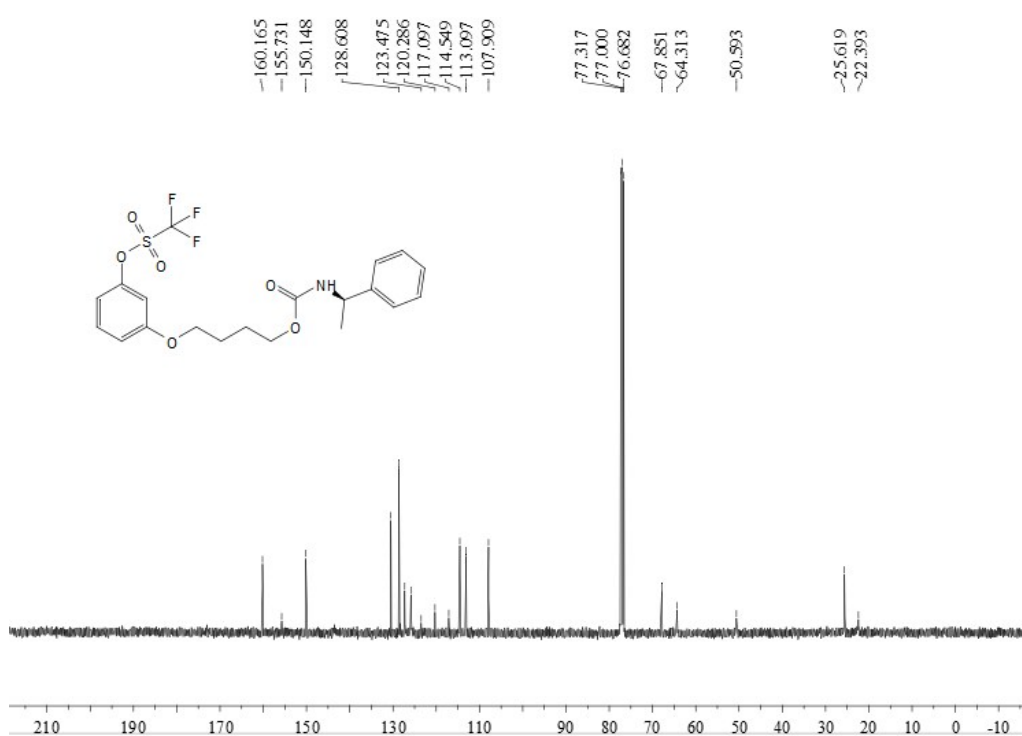

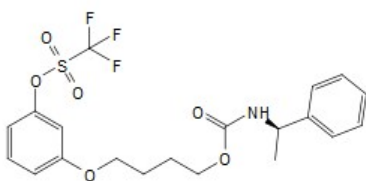

**3-(4-((Diethylcarbamoyl)oxy)butoxy)-5-methylphenyl trifluoromethanesulfonate (4p)**

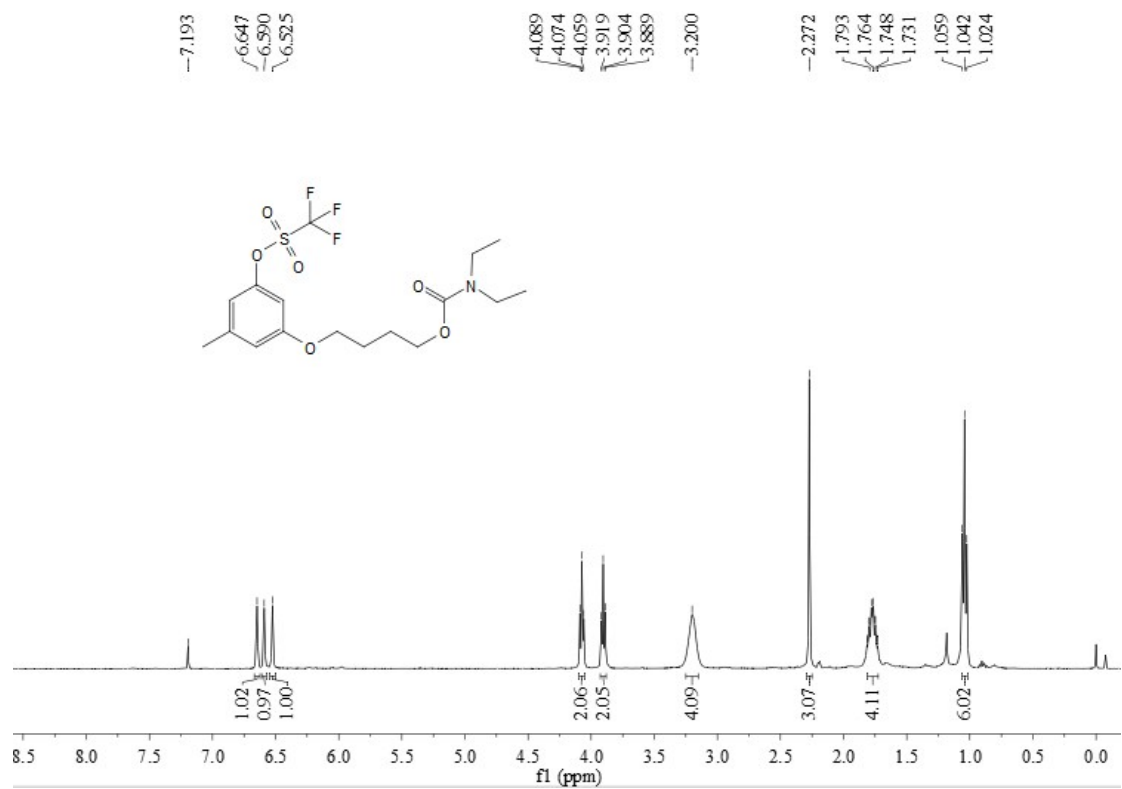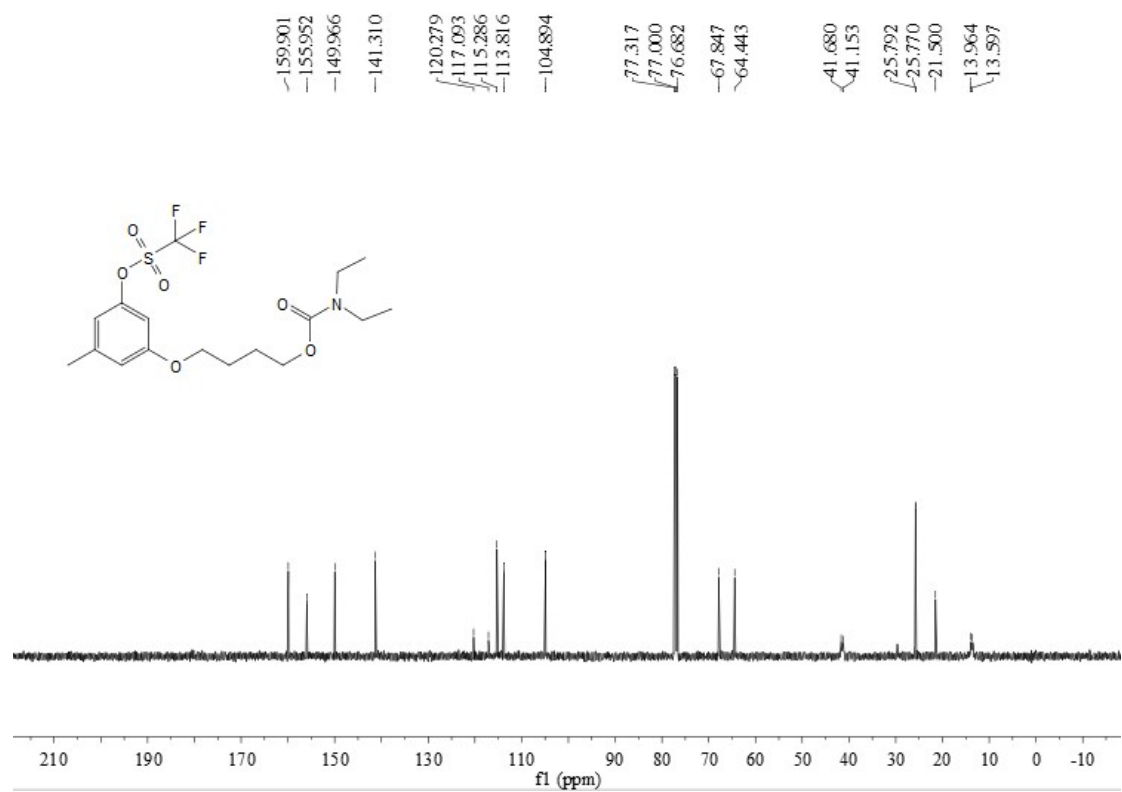

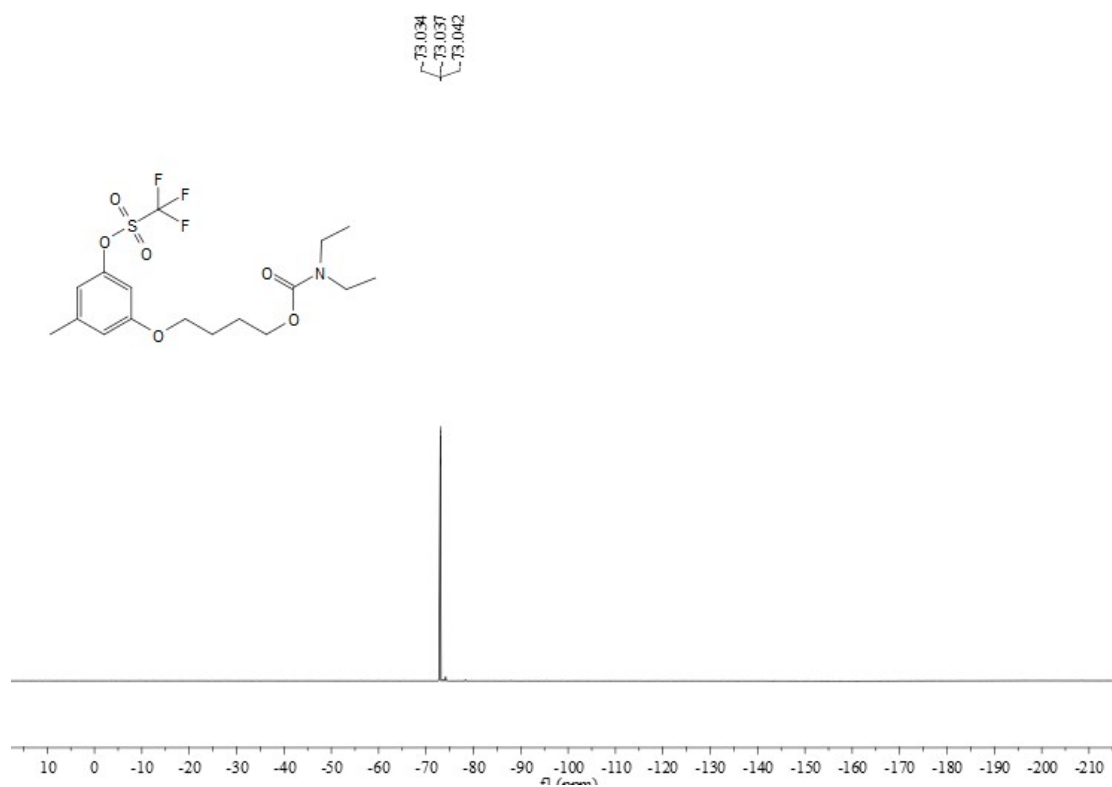

**5-4-((Diethylcarbamoyl)oxy)butoxy)-[1,1'-biphenyl]-3-yl trifluoromethanesulfonate (4q)**

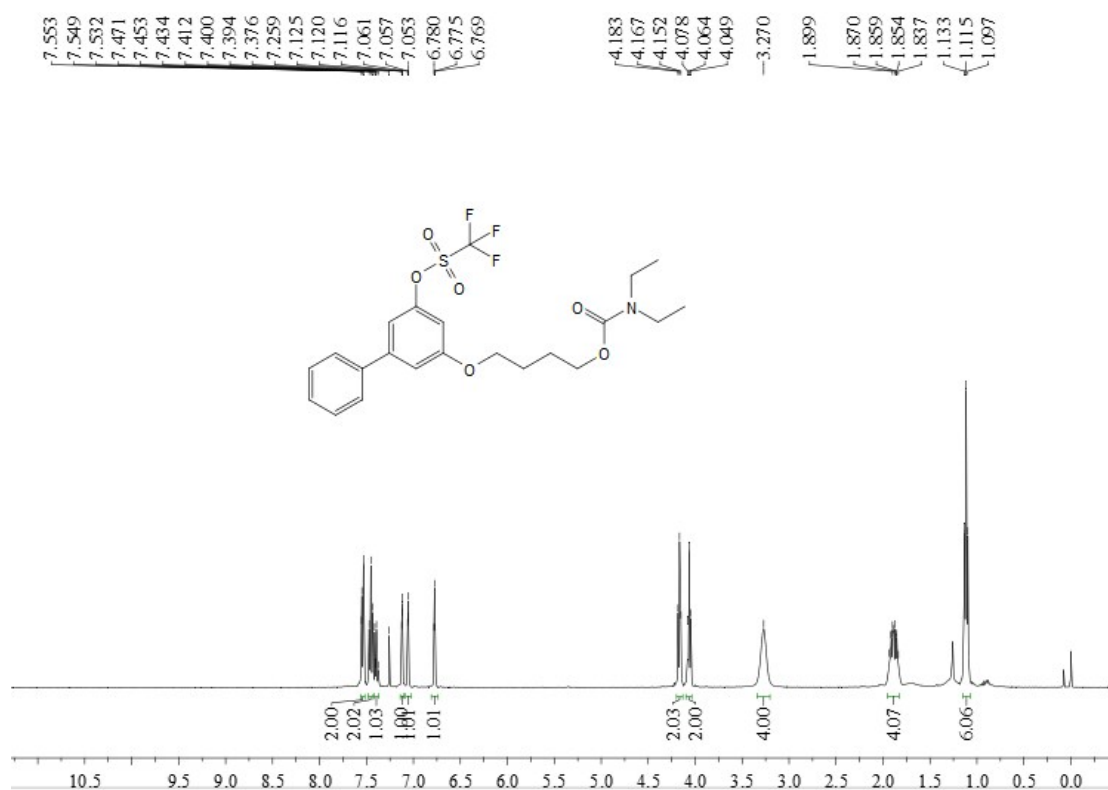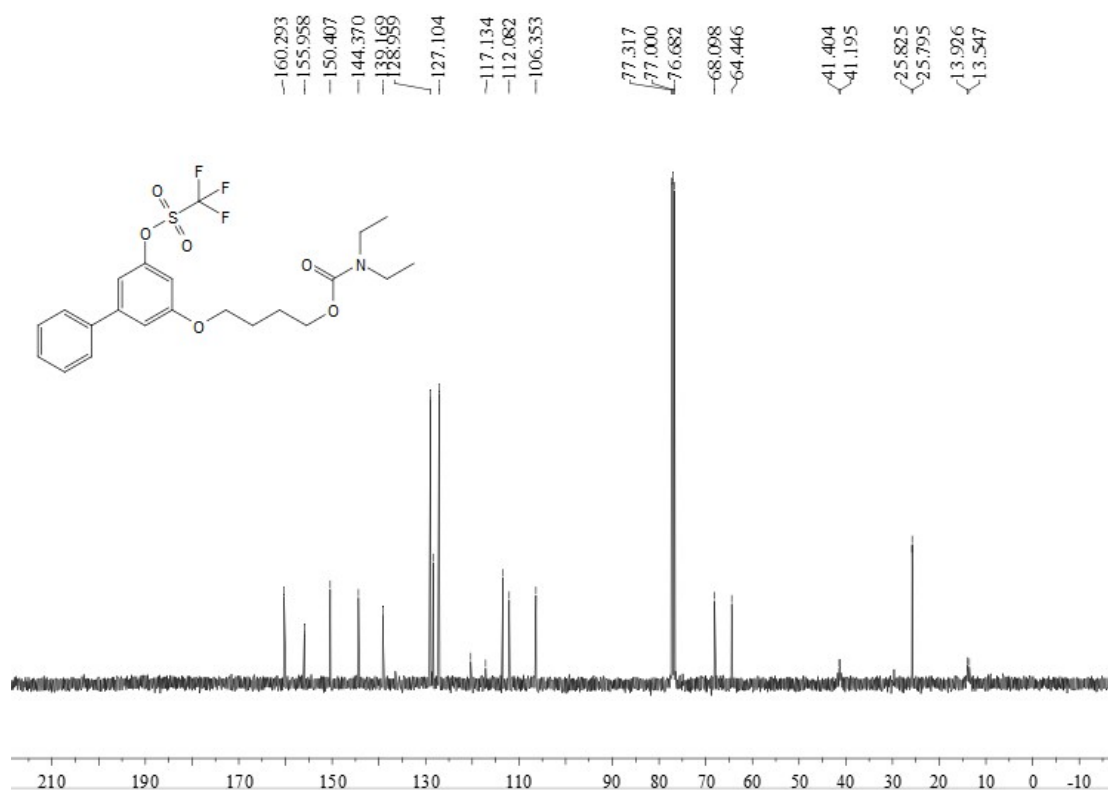

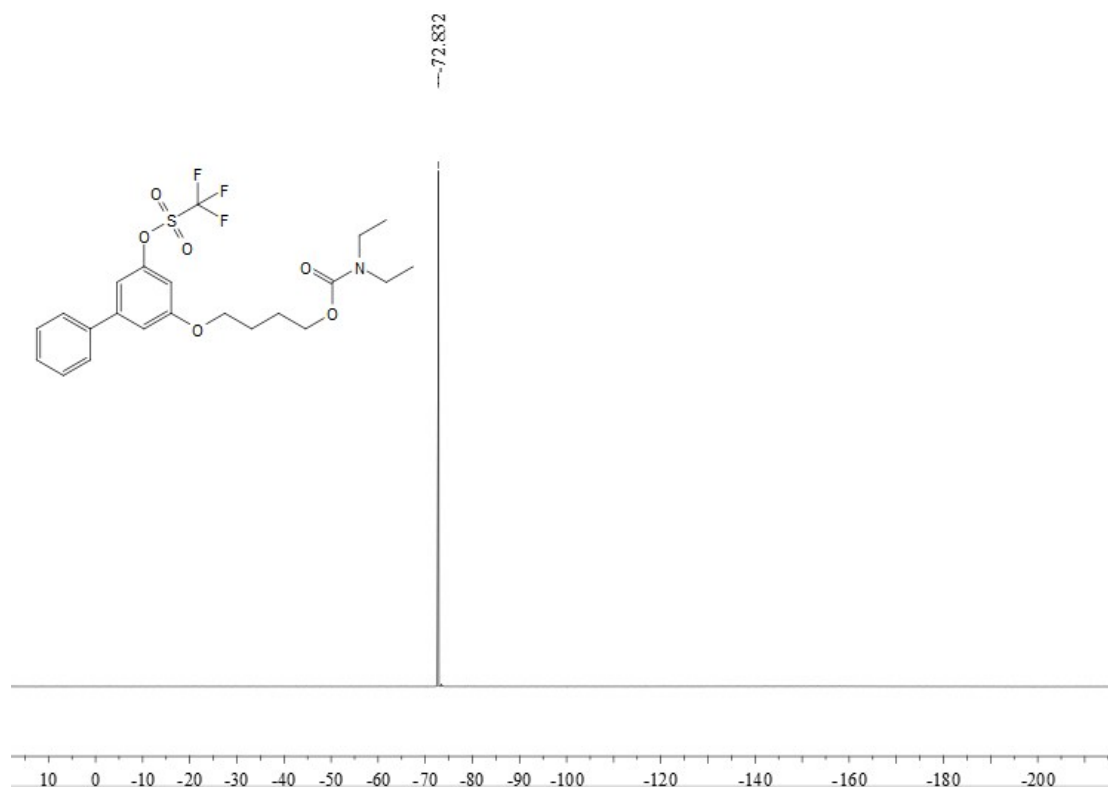

**5-(4-((Diethylcarbamoyl)oxy)butoxy)-2-methylphenyl trifluoromethanesulfonate (4r)**



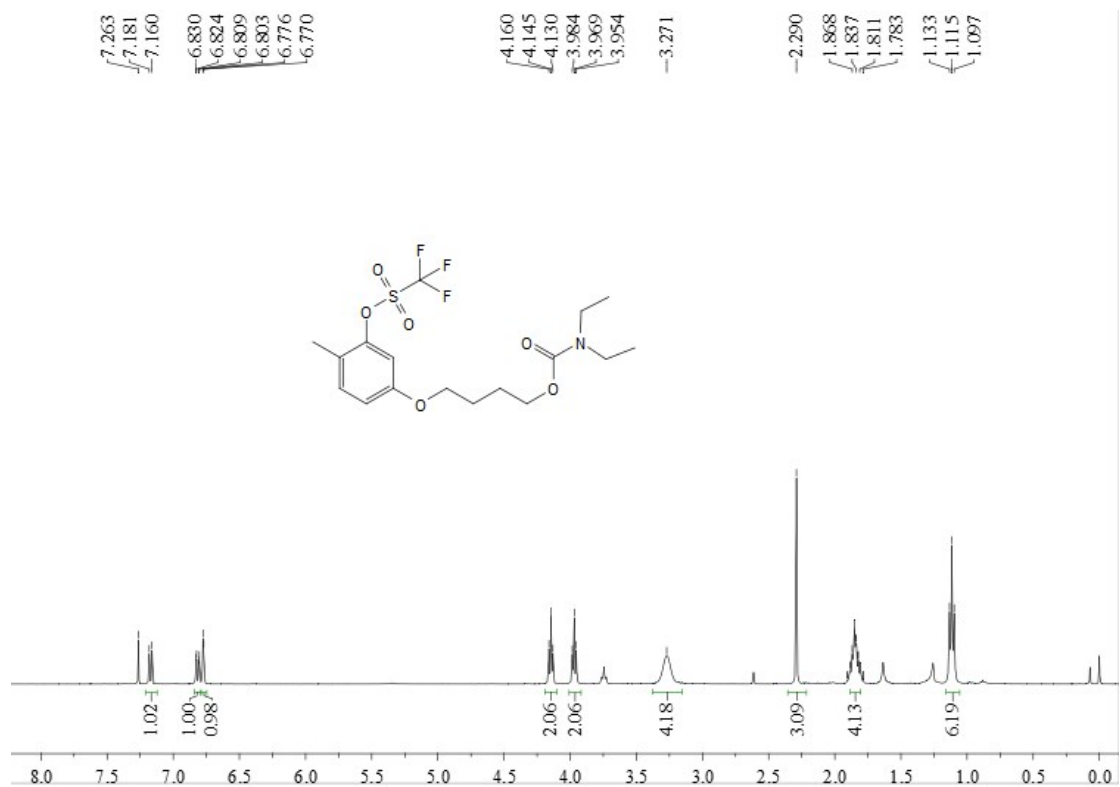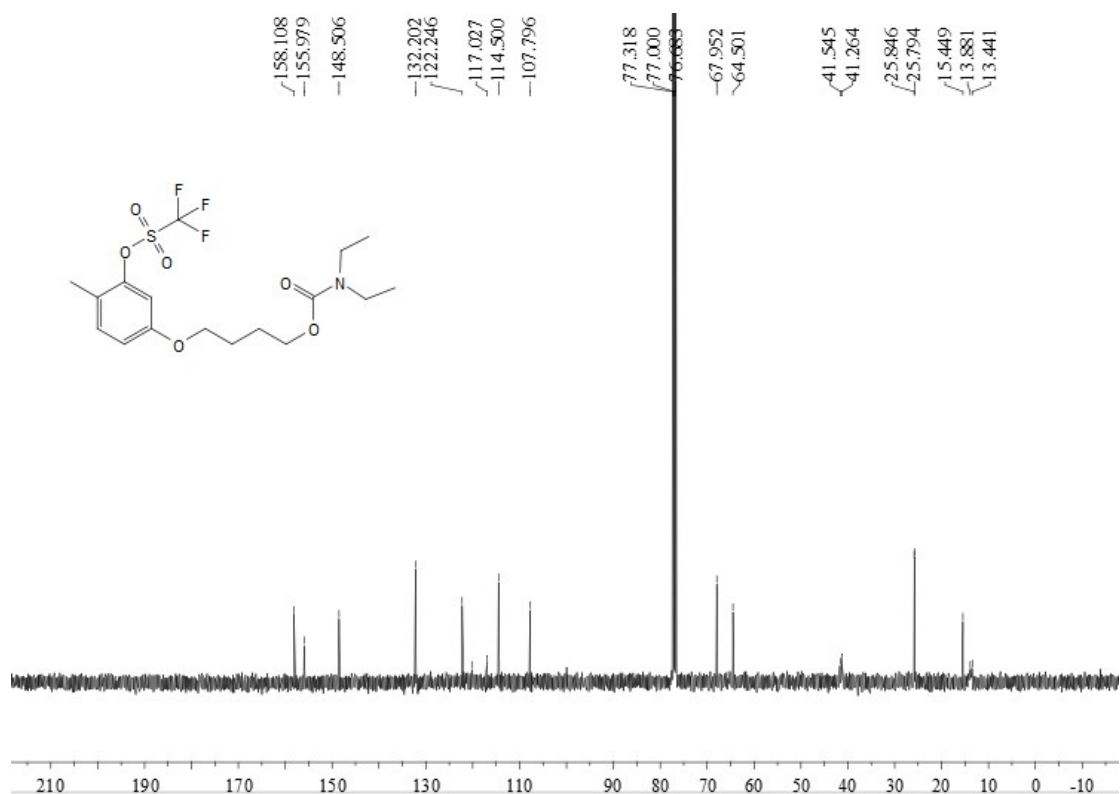

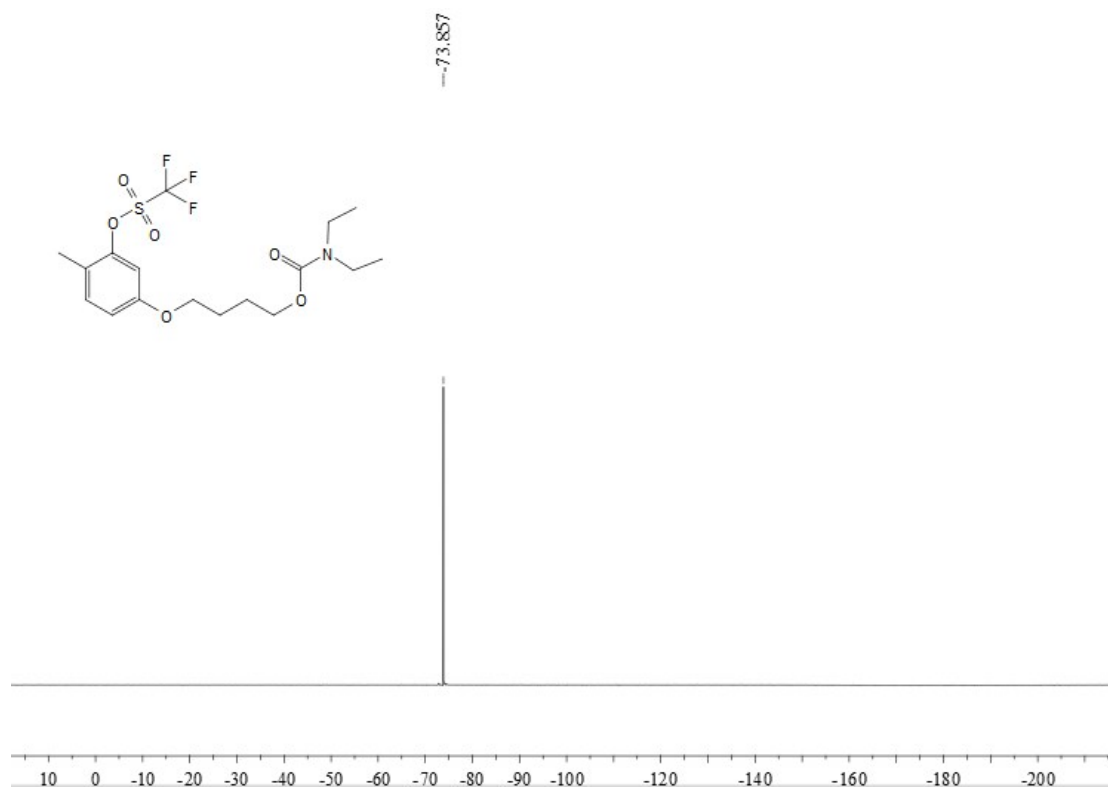

**3-(4-((Diethylcarbamoyl)oxy)butoxy)-4-methylphenyl trifluoromethanesulfonate(4r')**

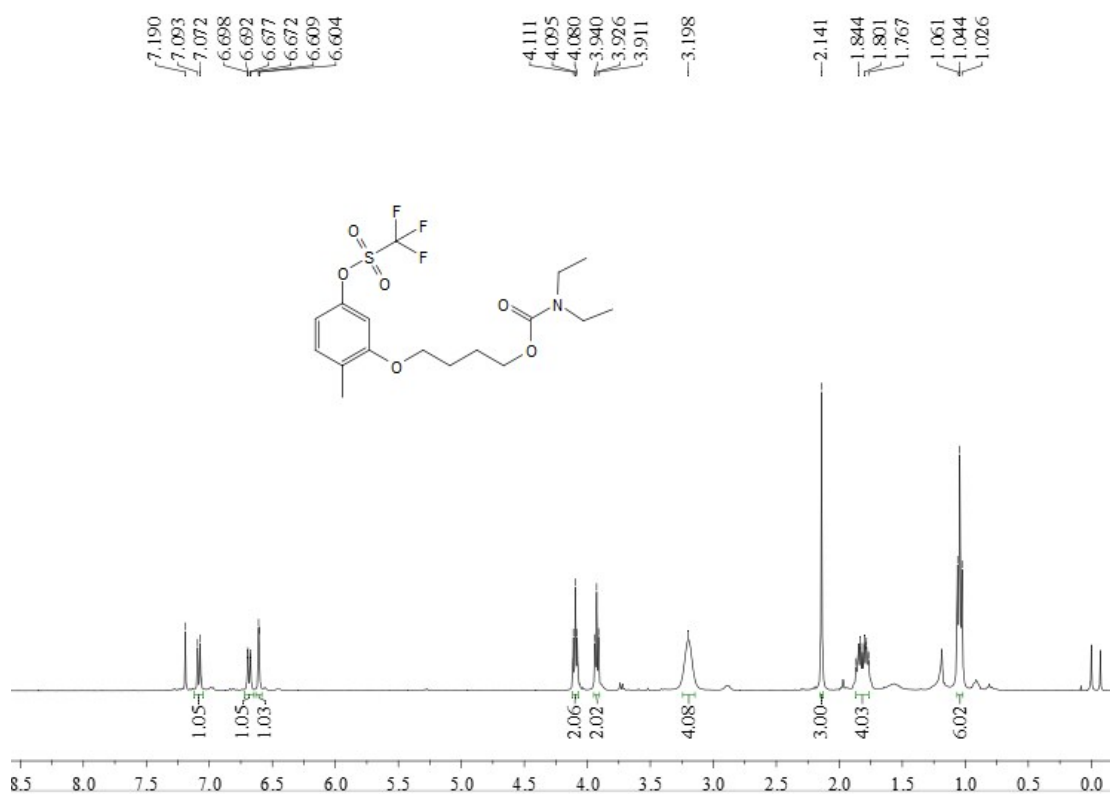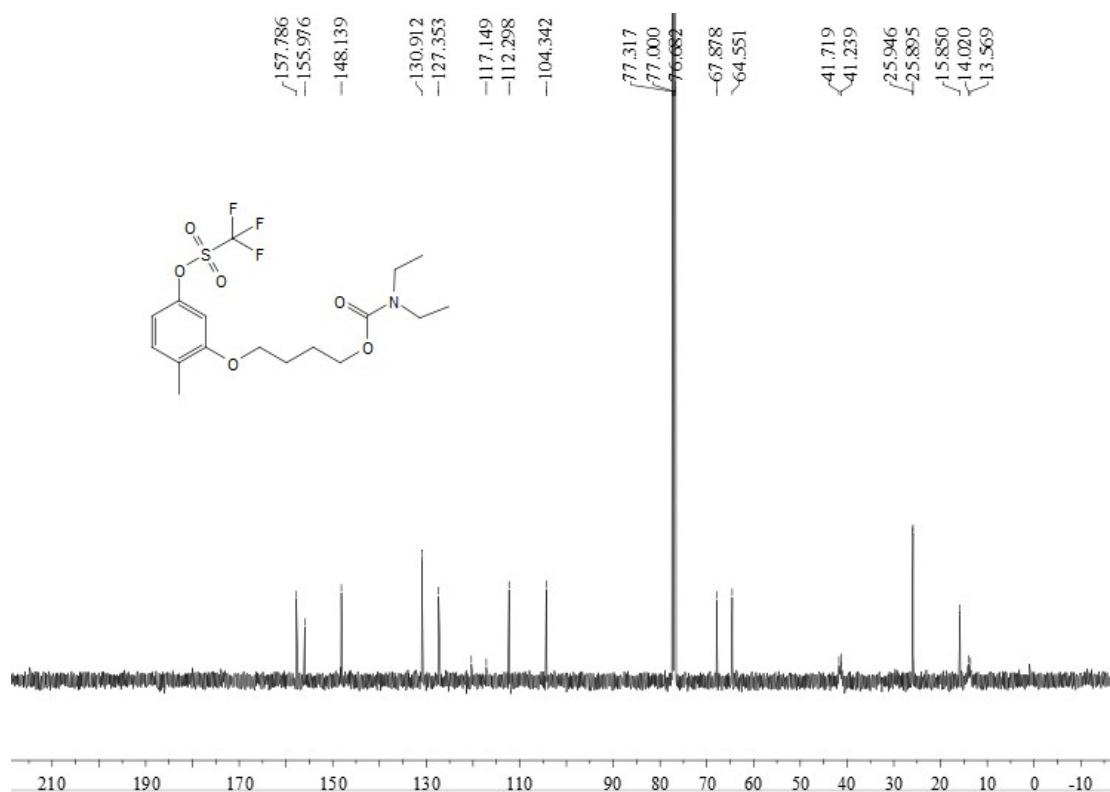

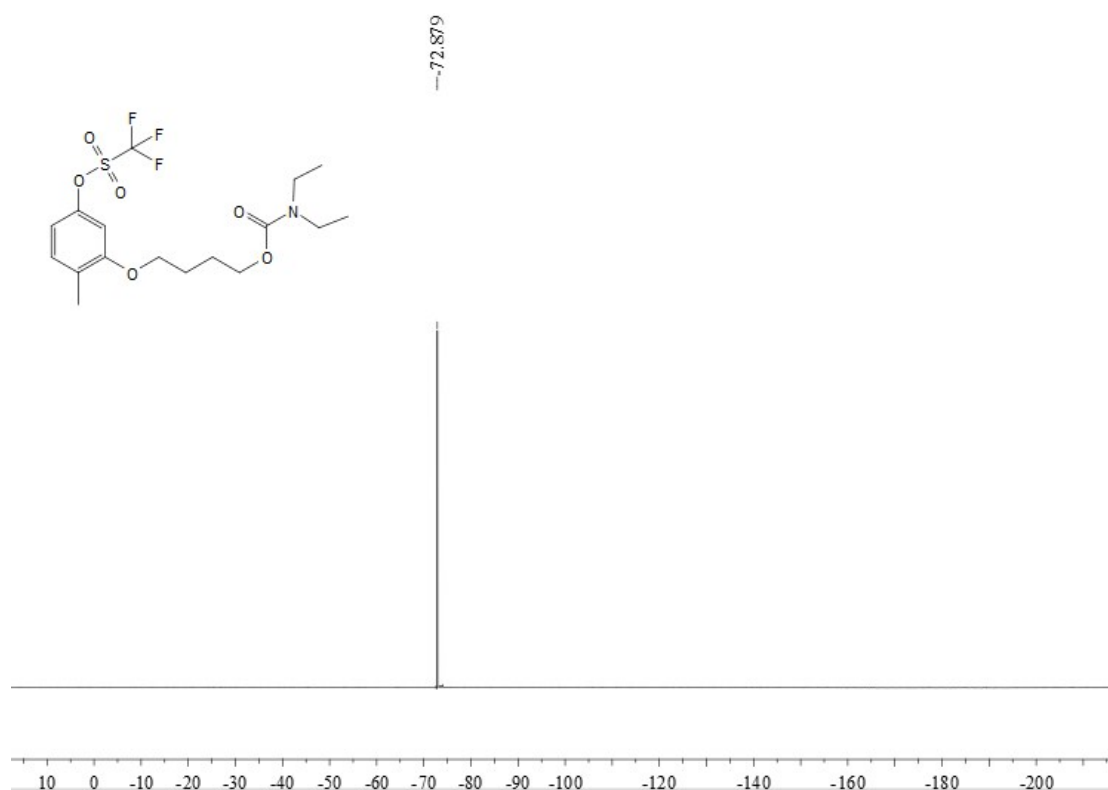

**5-((4-((Diethylcarbamoyl)oxy)butoxy)-2-ethylphenyl trifluoromethanesulfonate (4s)**

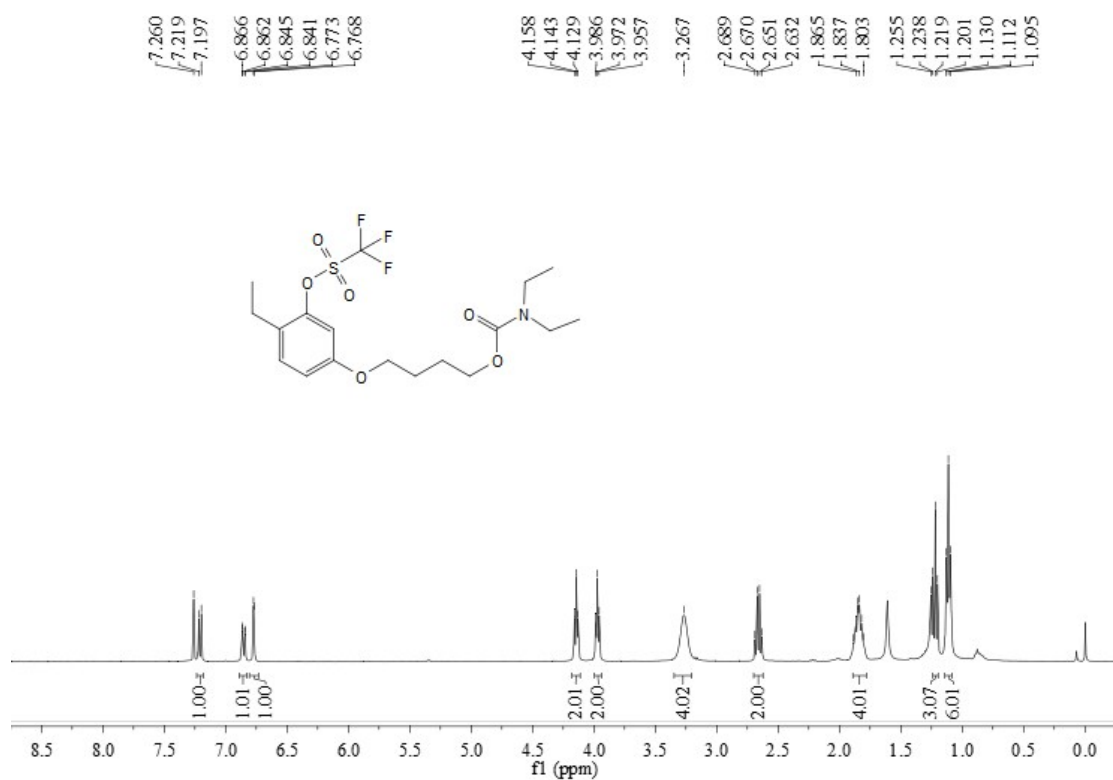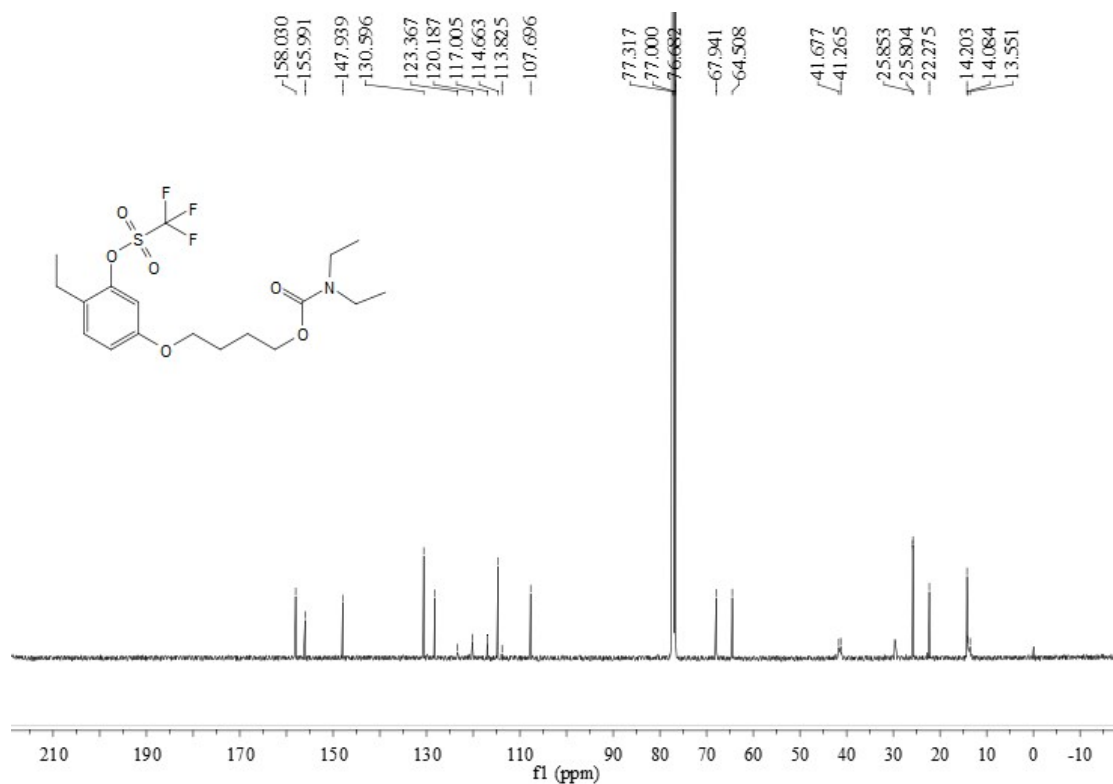

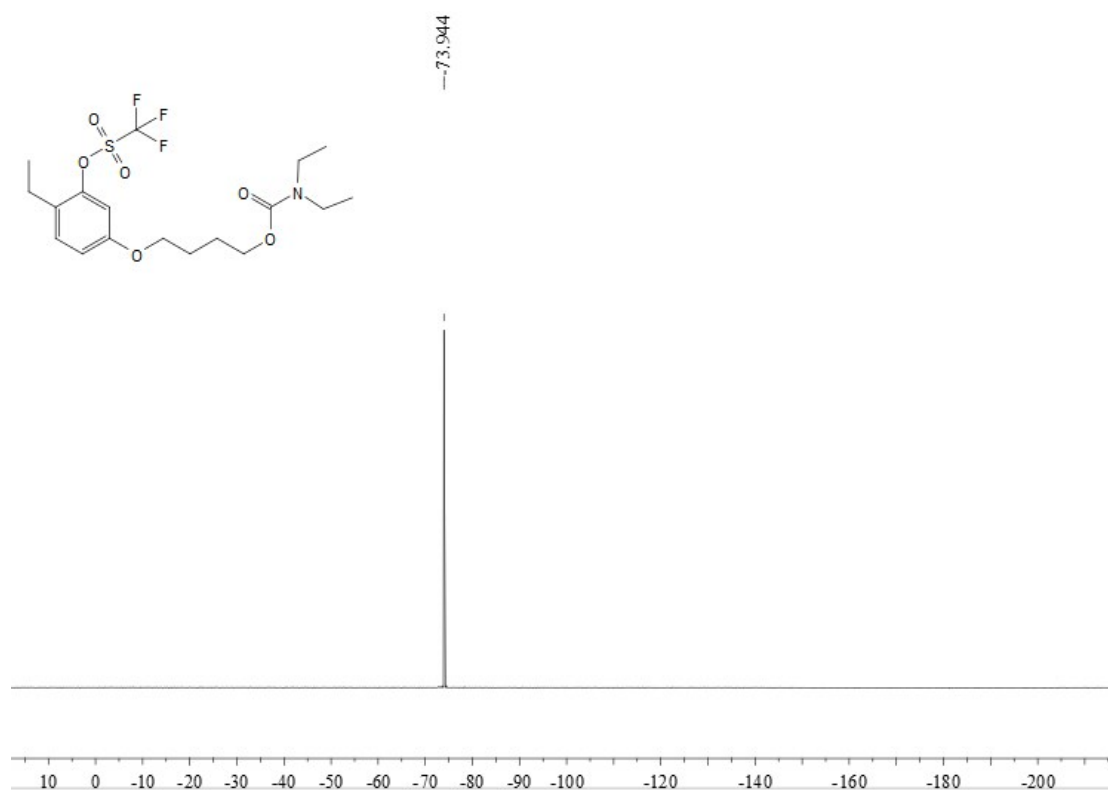

**3-(4-((Diethylcarbamoyl)oxy)butoxy)-4-ethylphenyl trifluoromethanesulfonate (4s')**

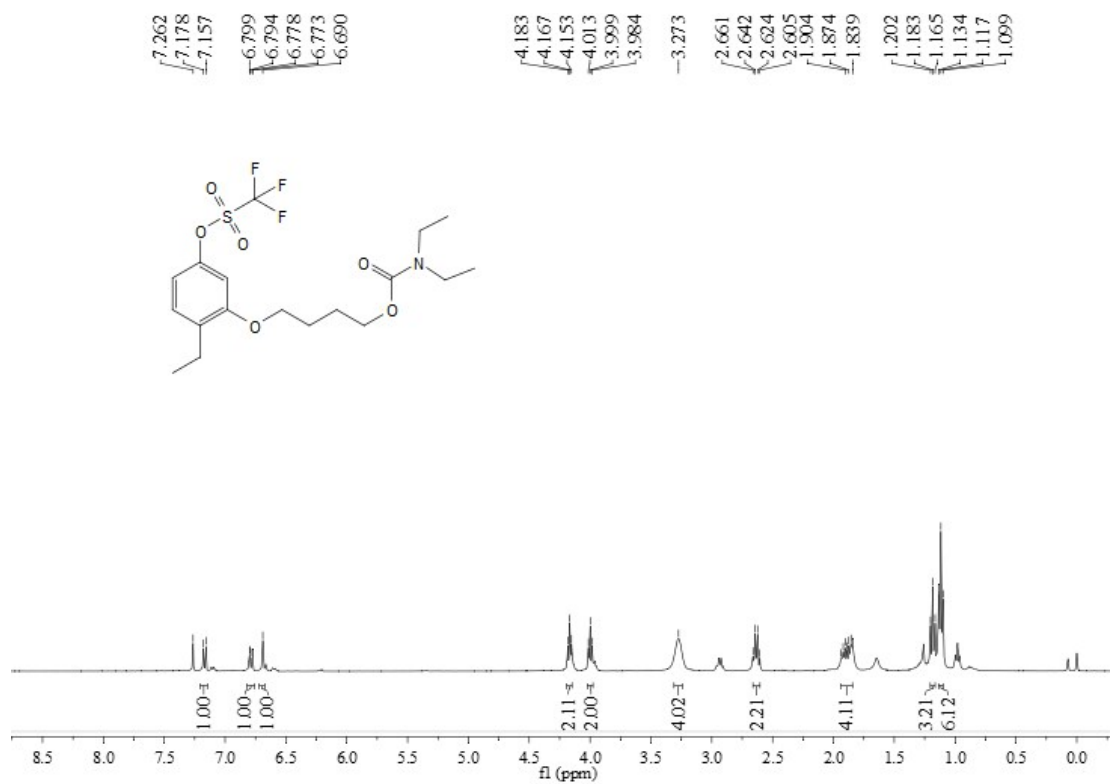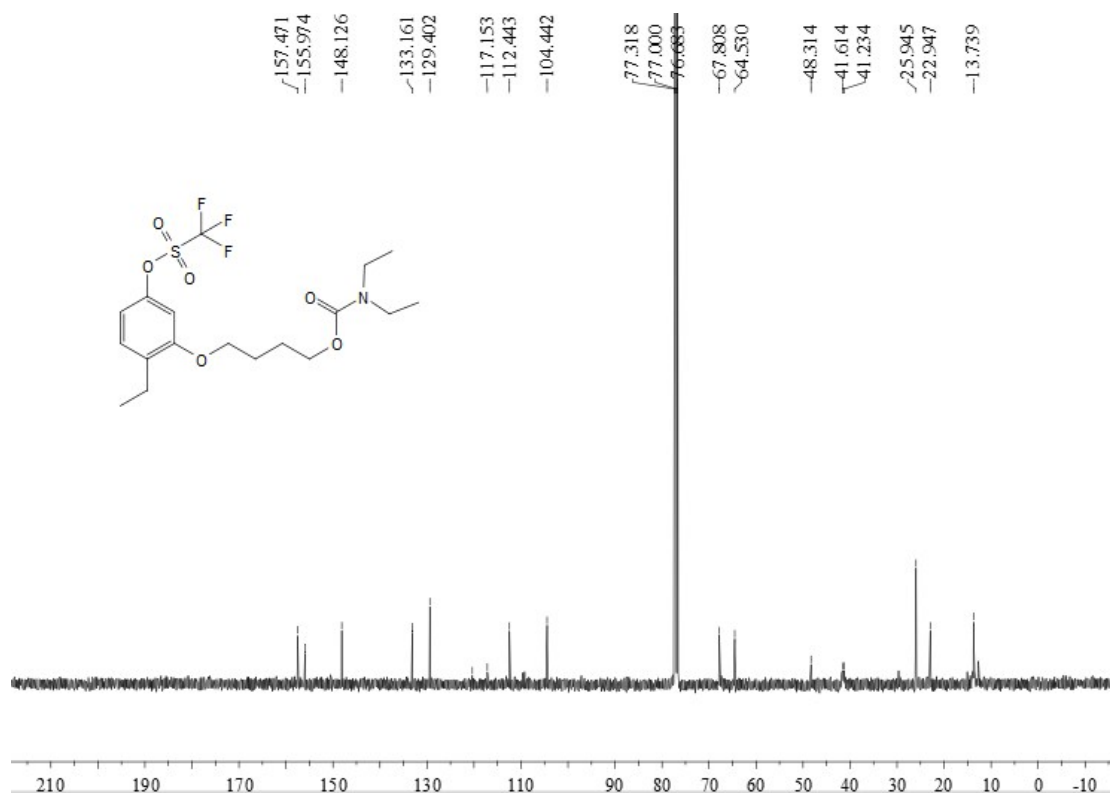

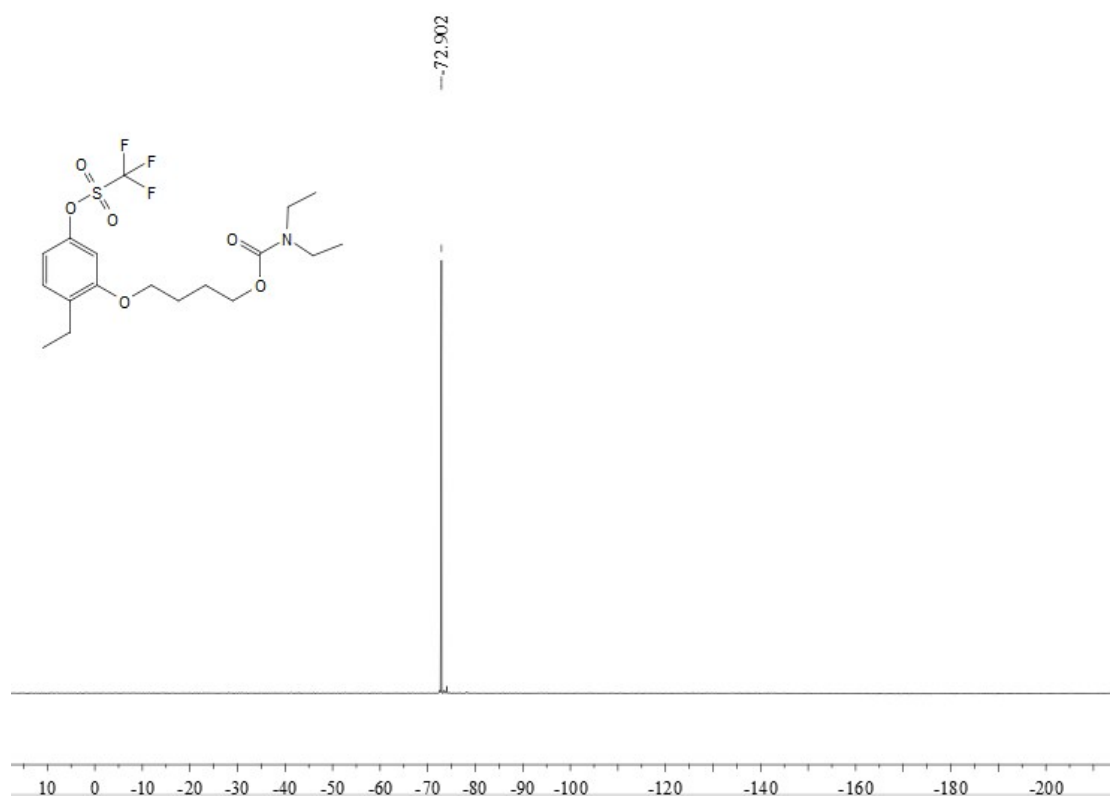

**The mixture of 3-((5-((Diethylcarbamoyl)oxy)pentan-2-yl)oxy)phenyl trifluoromethanesulfonate (4t) and 3-((4-((Diethylcarbamoyl)oxy)pentyl)oxy)phenyl trifluoromethanesulfonate (4t')**



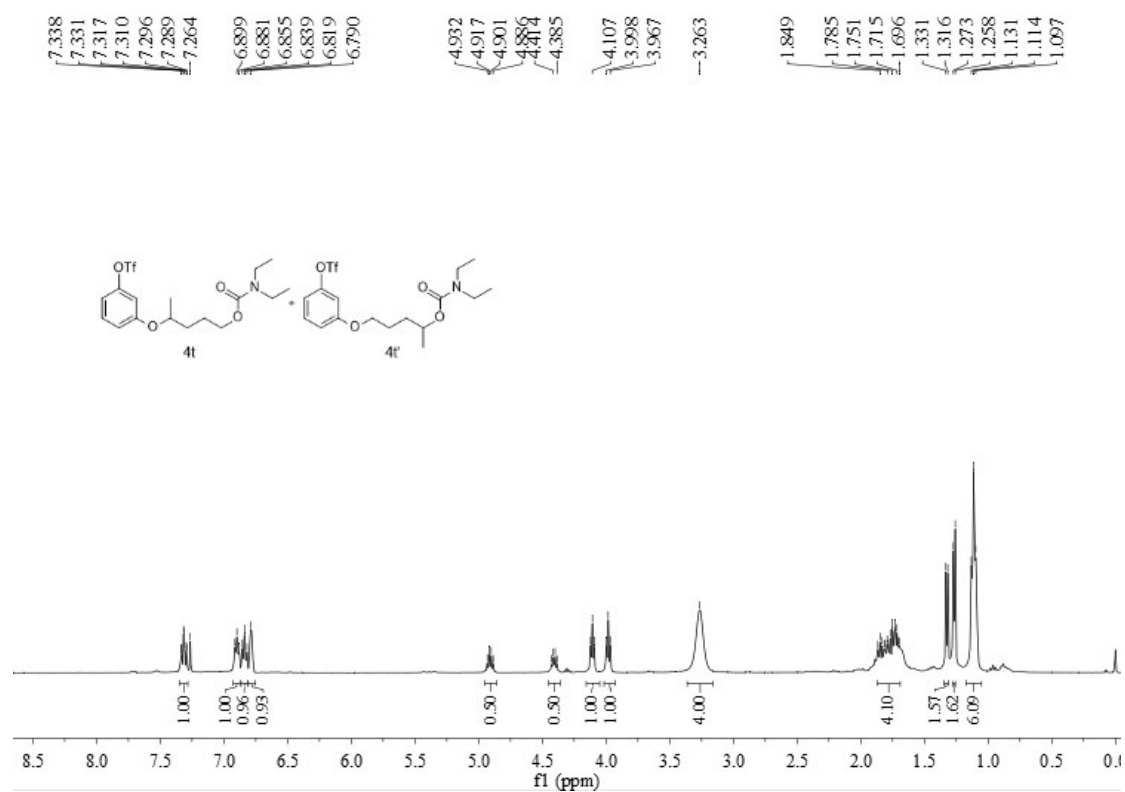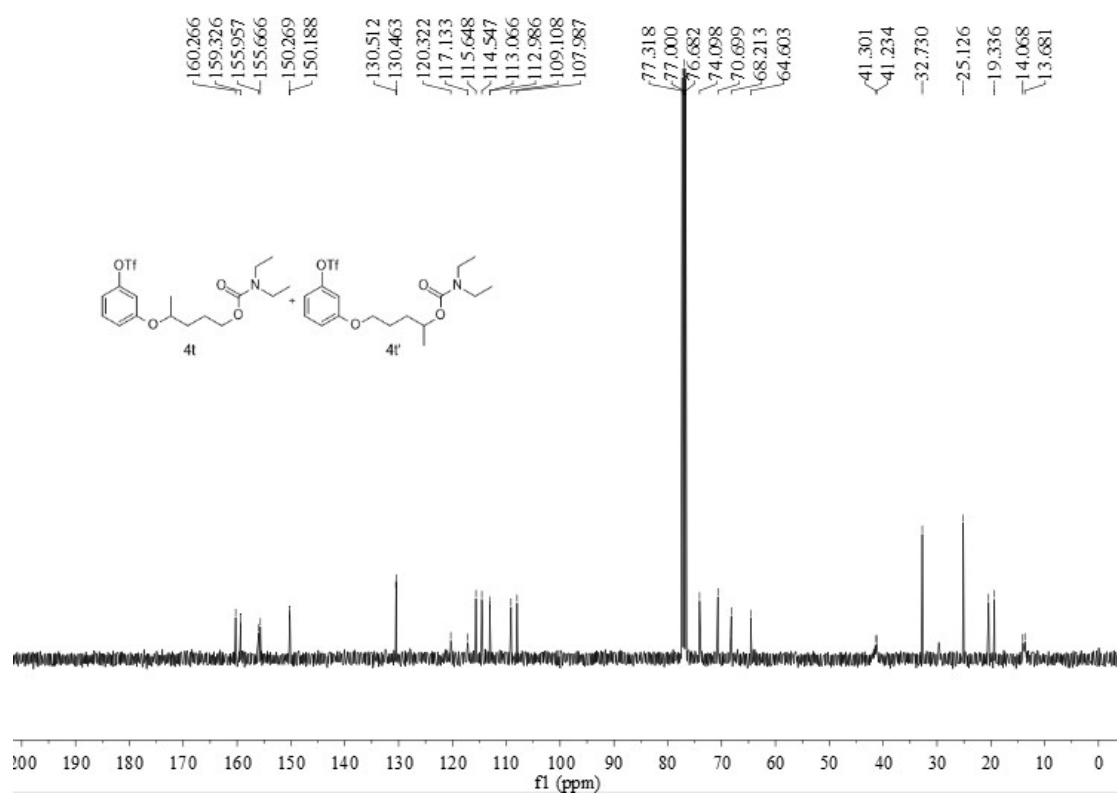

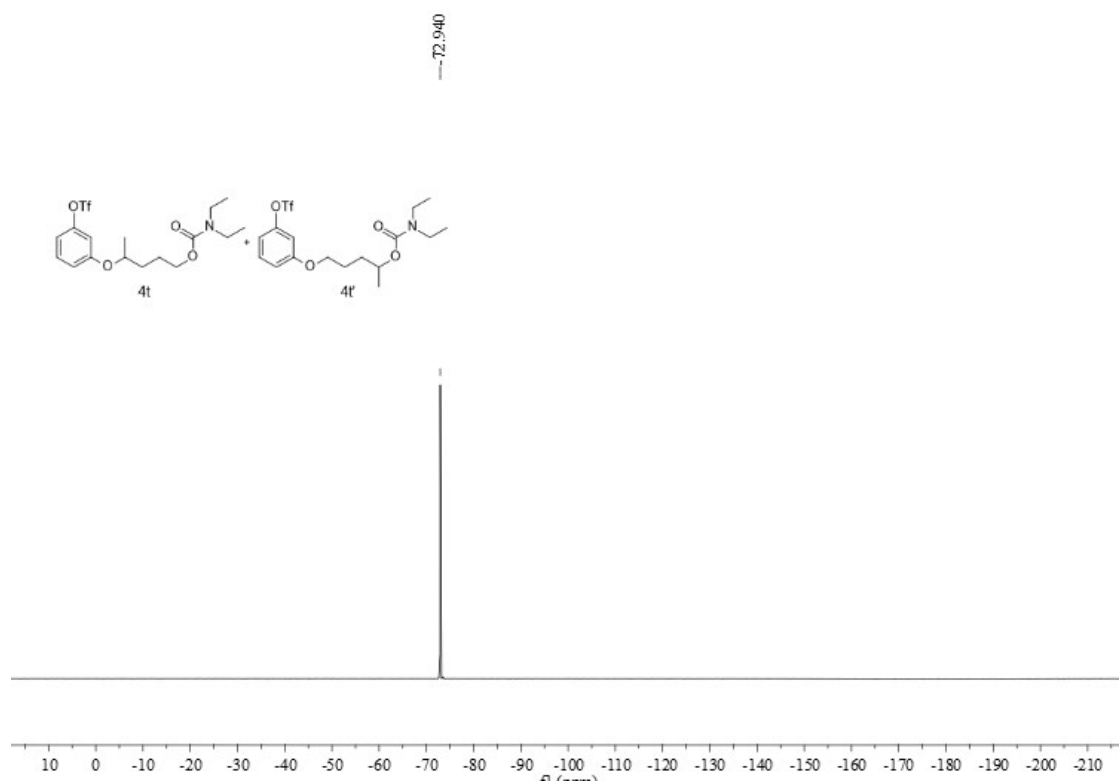

**3-((5-((Diethylcarbamoyl)oxy)pentyl)oxy)phenyl trifluoromethanesulfonate (4u)**

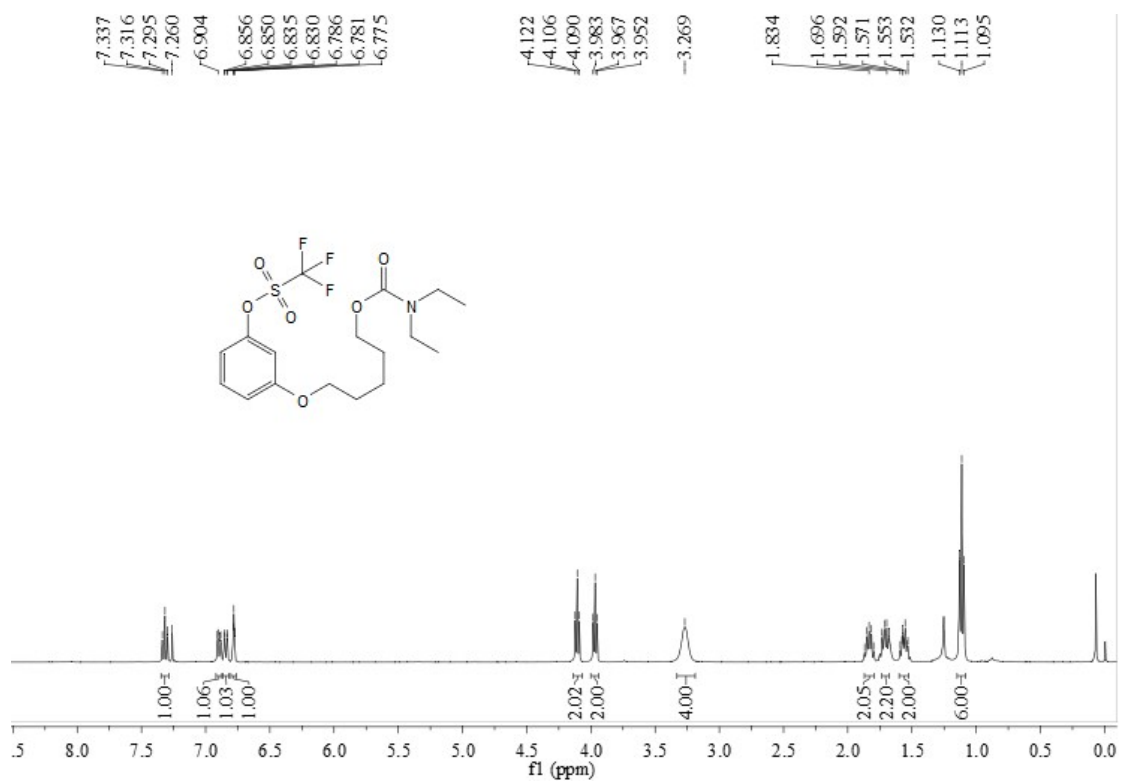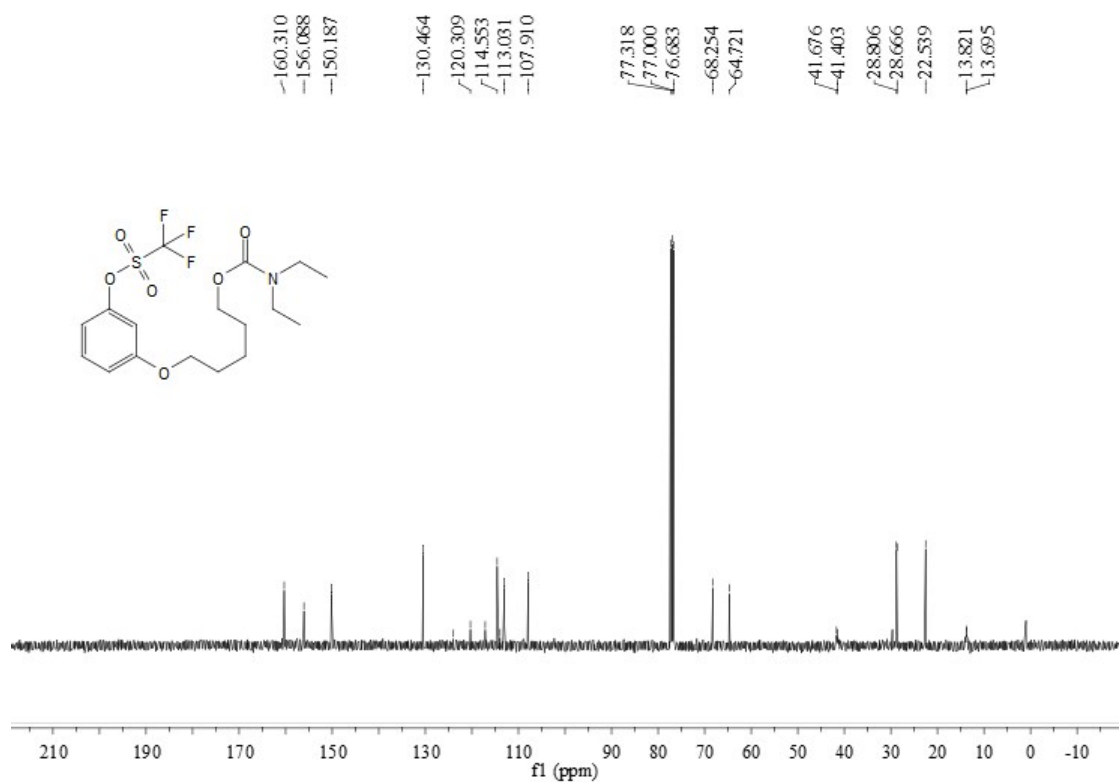

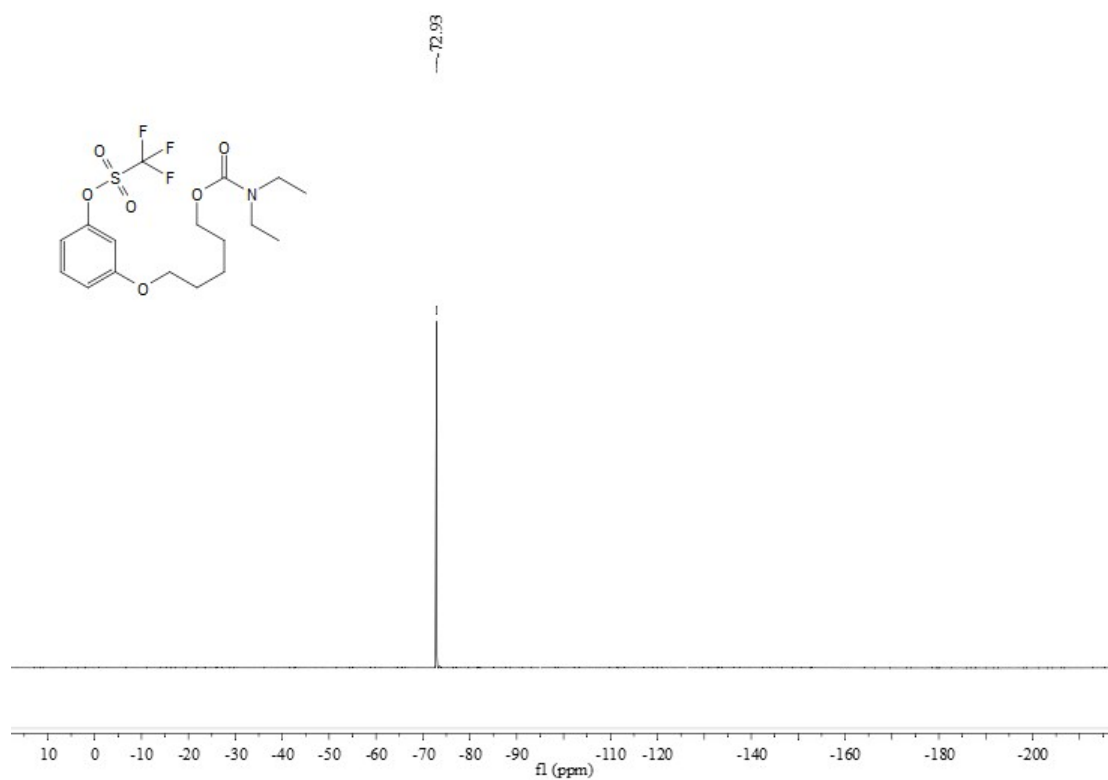

**4-([1,1'-Biphenyl]-3-yloxy)butyl diethylcarbamate (5)**

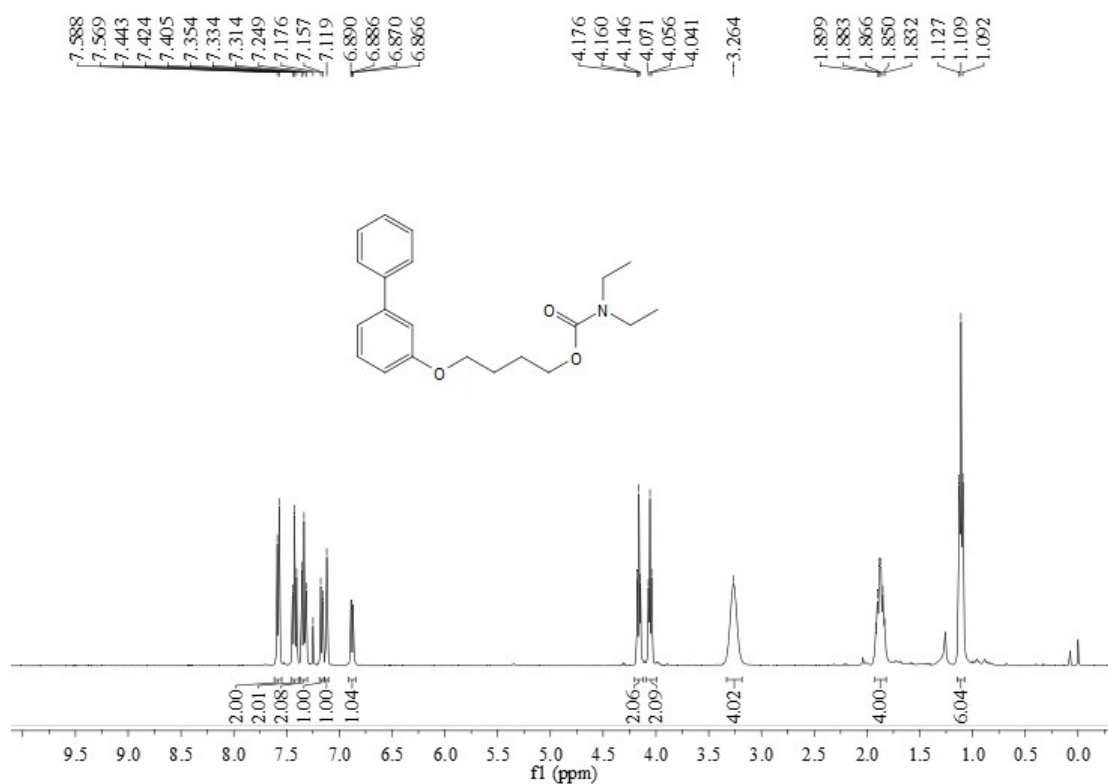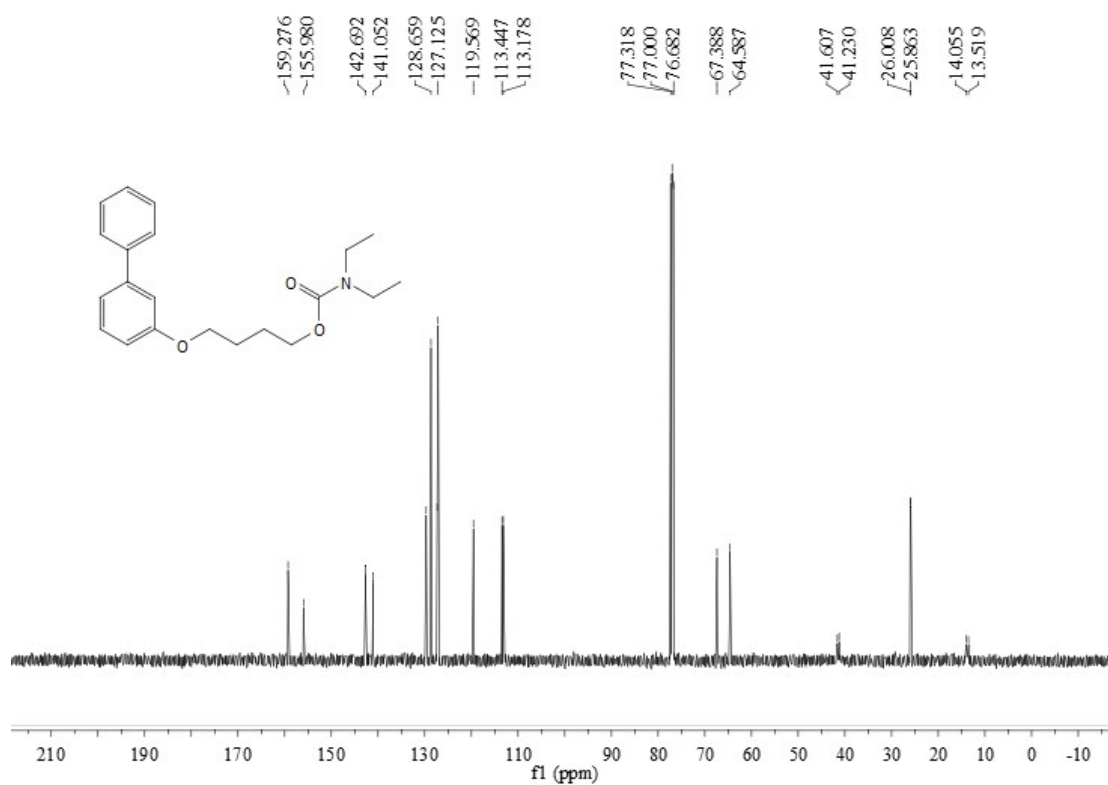

4-(3-(3,5-Dimethylisoxazol-4-yl)phenoxy)butyl dimethylcarbamate (6)

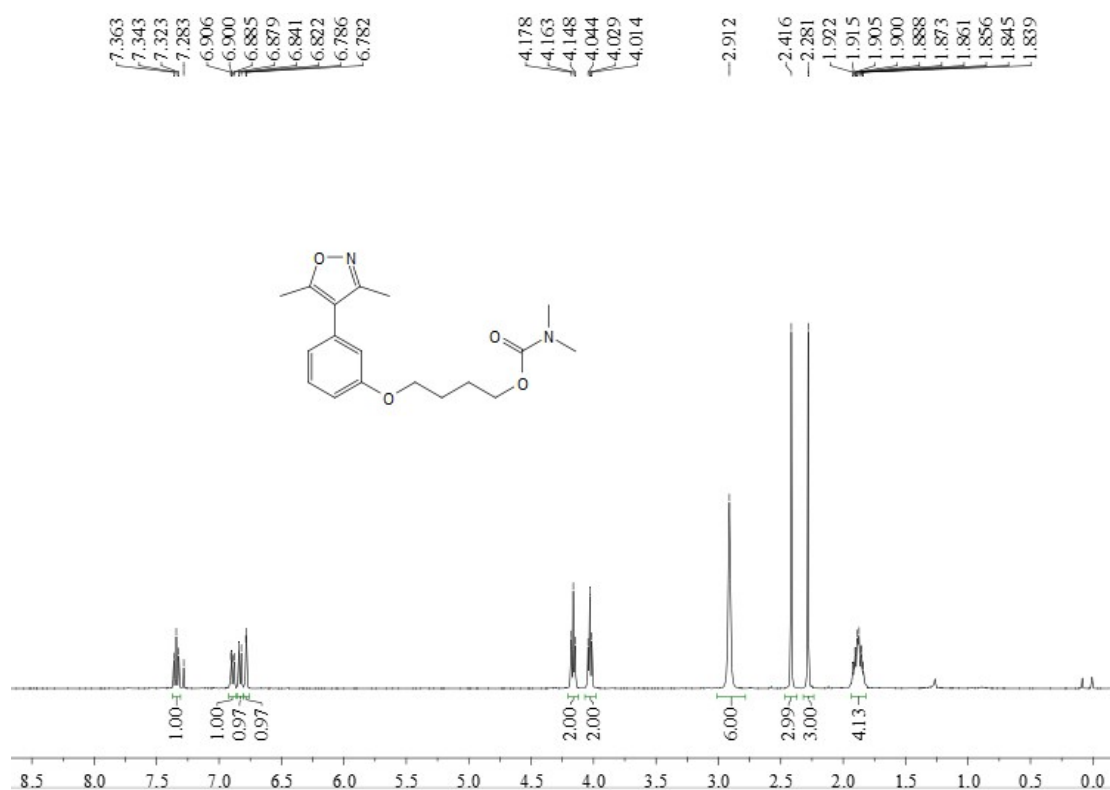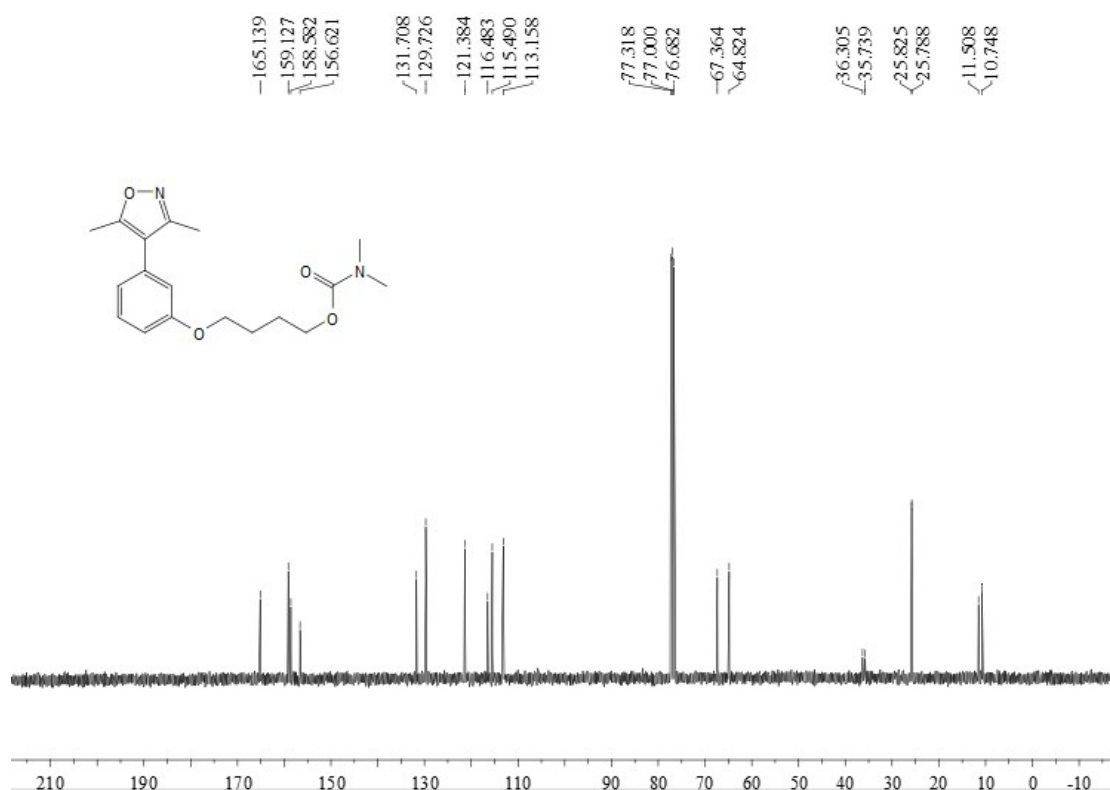

4-(3-Hydroxyphenoxy)butyl dimethylcarbamate (7)

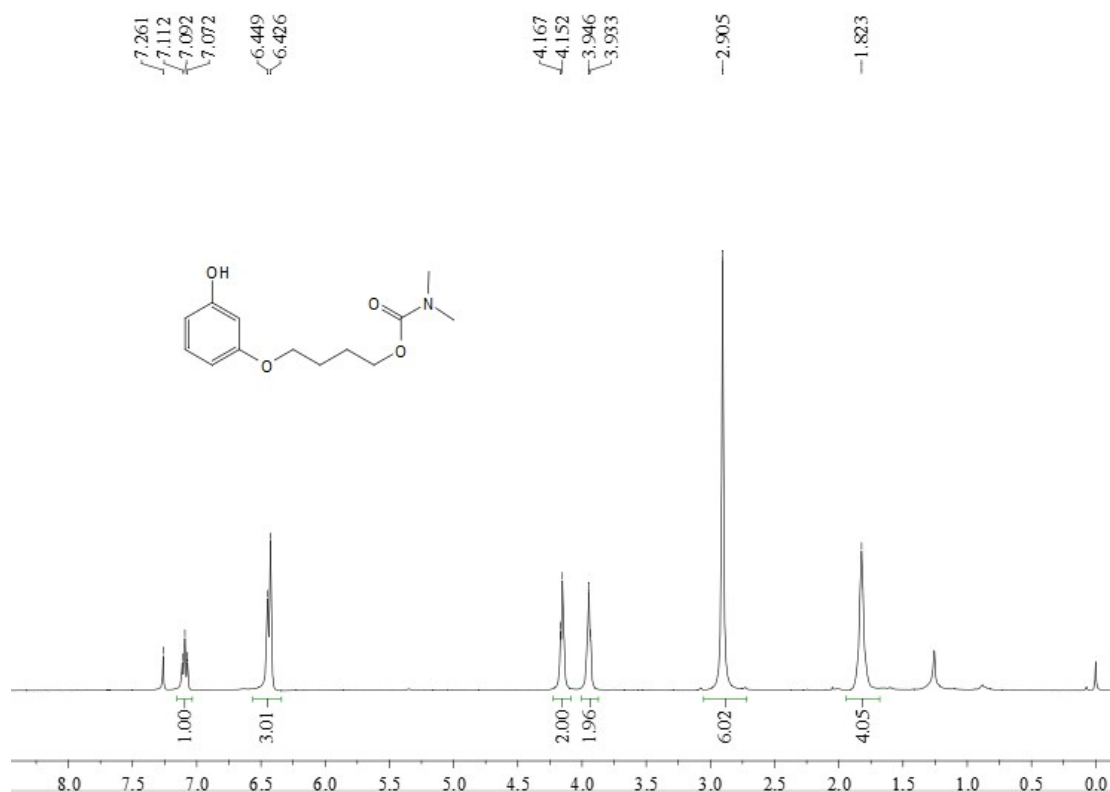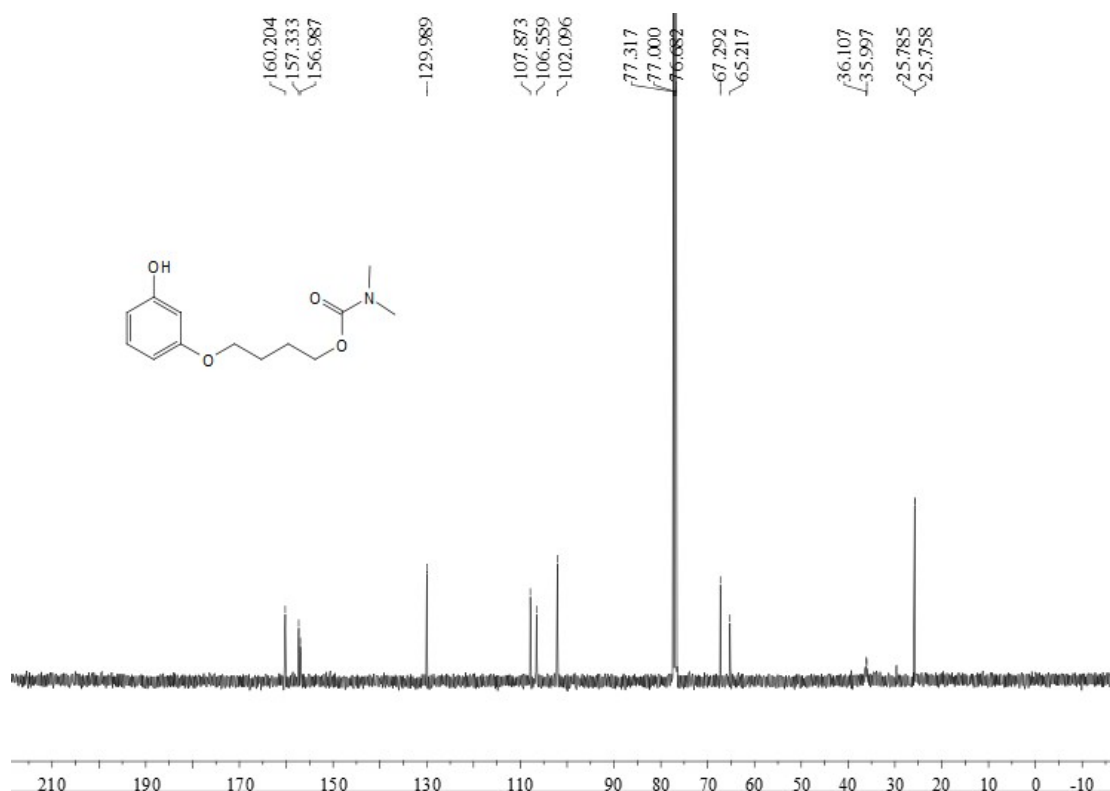

4-(3-(Diisopropylamino)phenoxy)butyl diethylcarbamate (8)

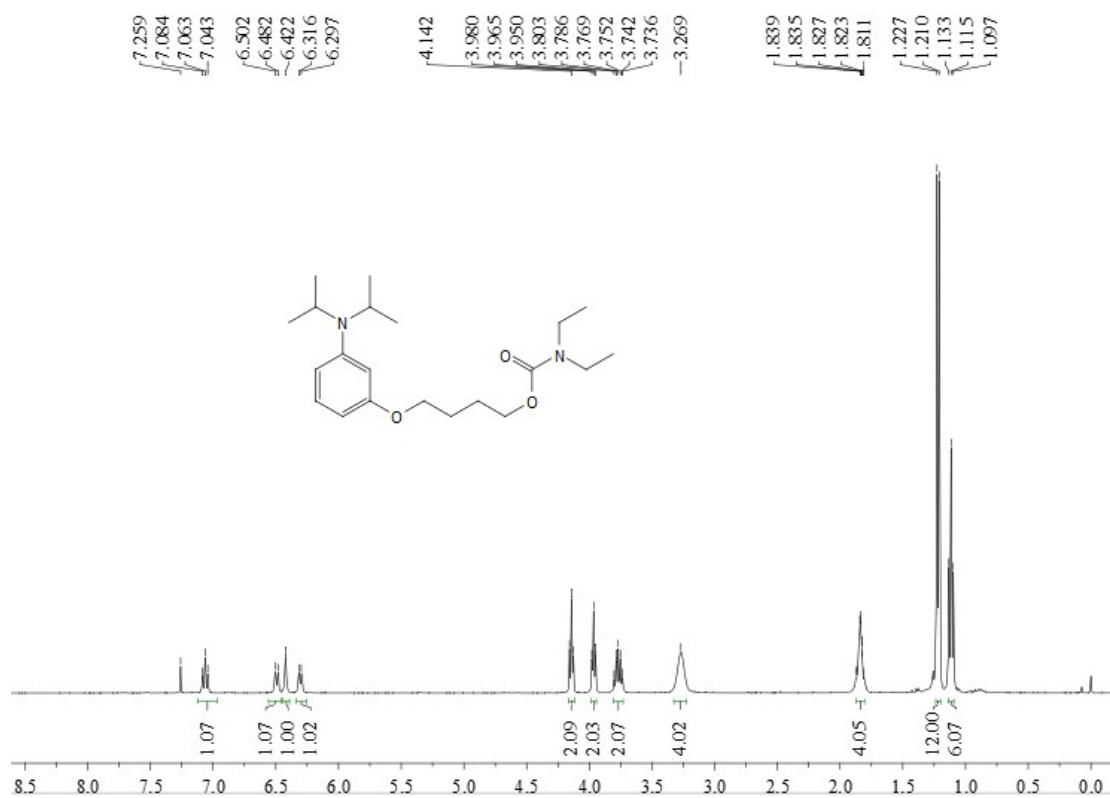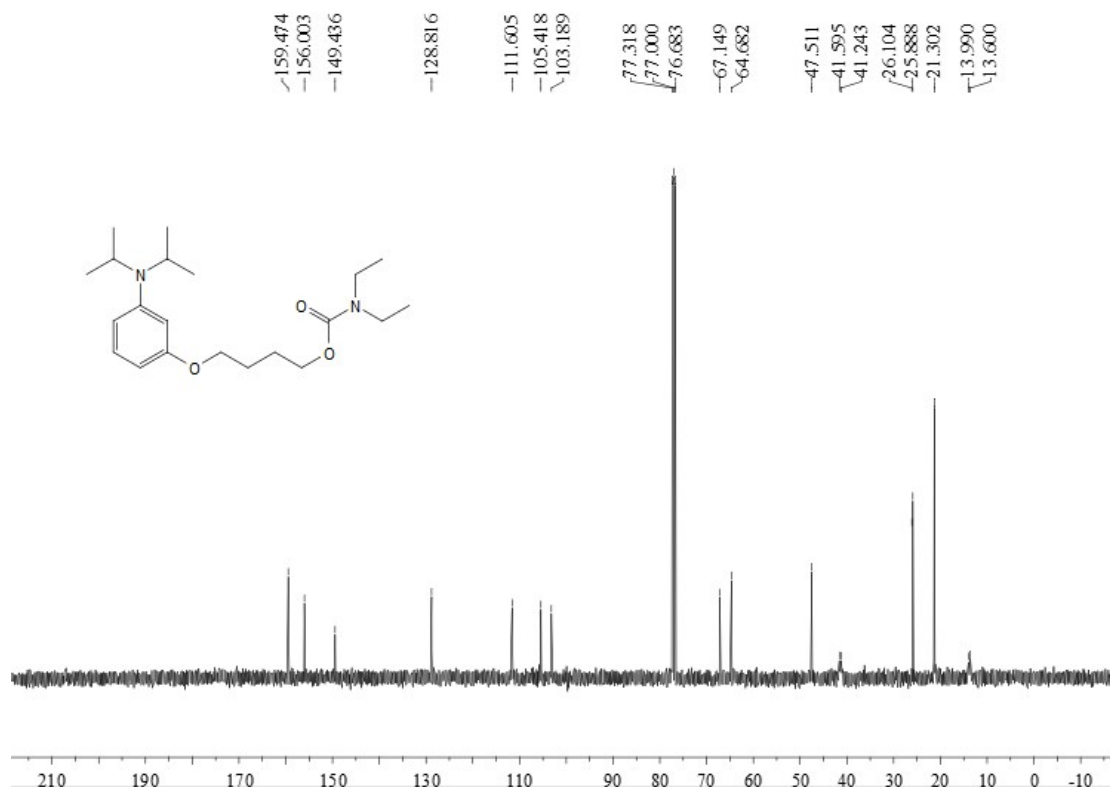

2-D-3-(4-((Diethylcarbamoyl)oxy)butoxy)phenyl trifluoromethanesulfonate (4c-D)



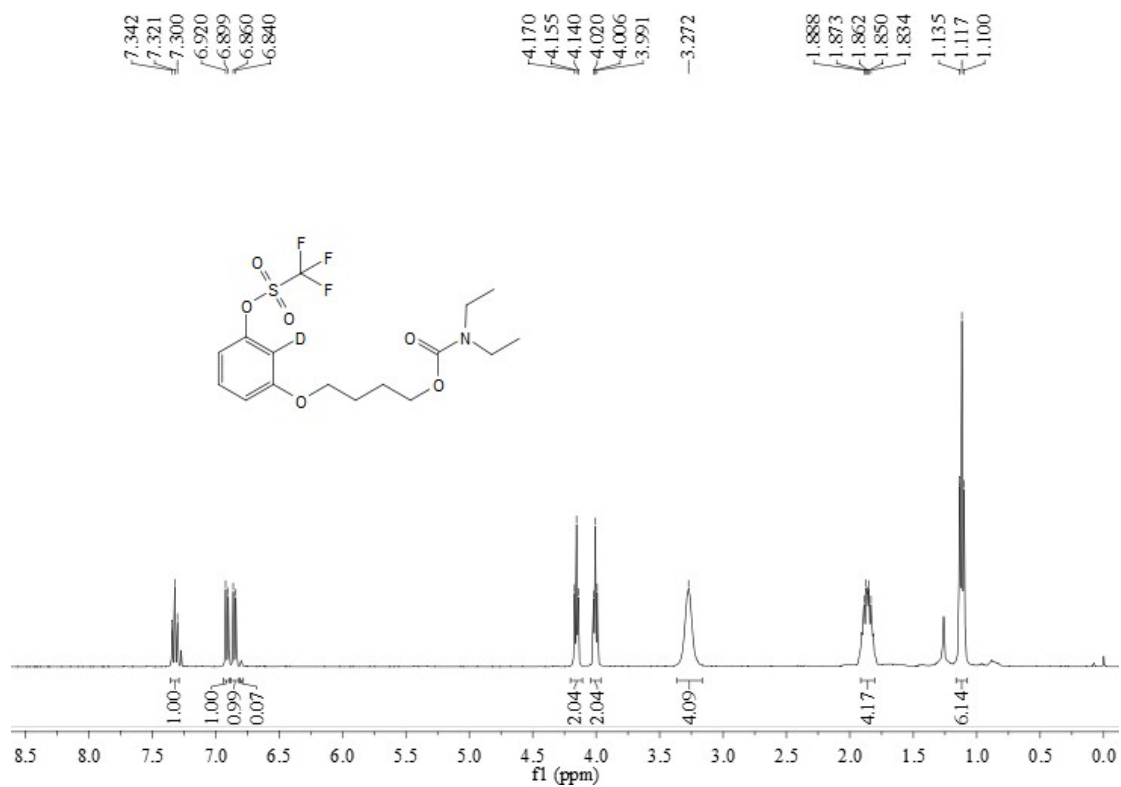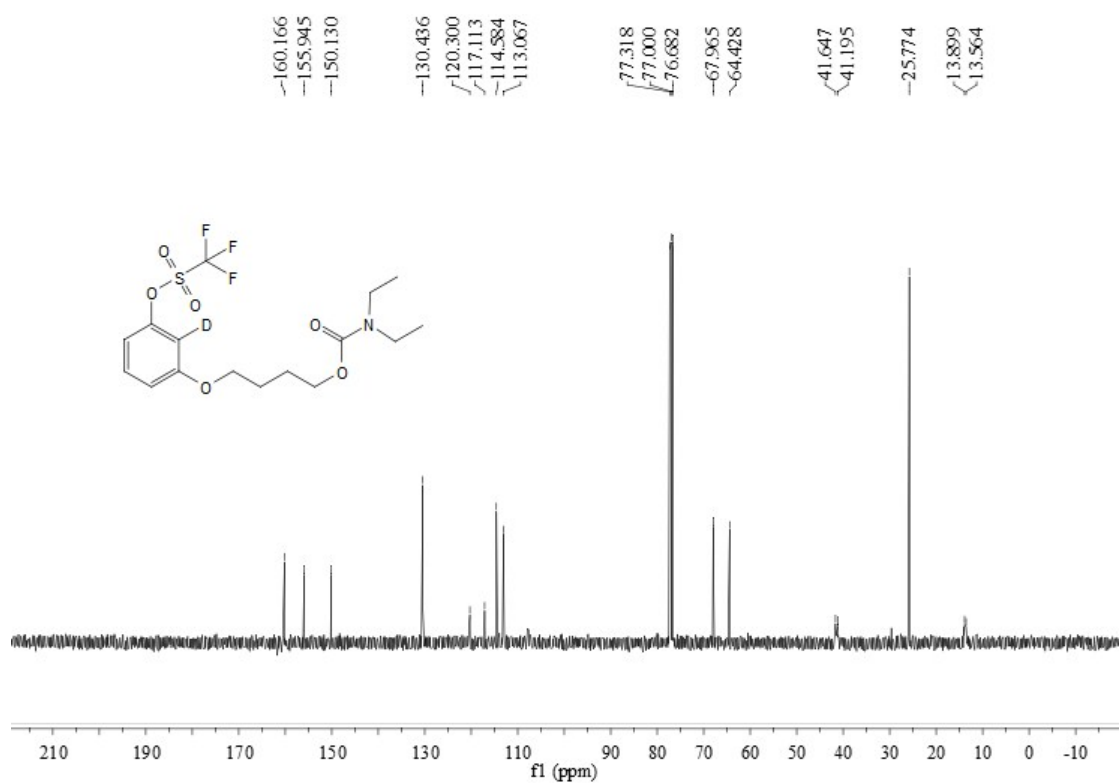

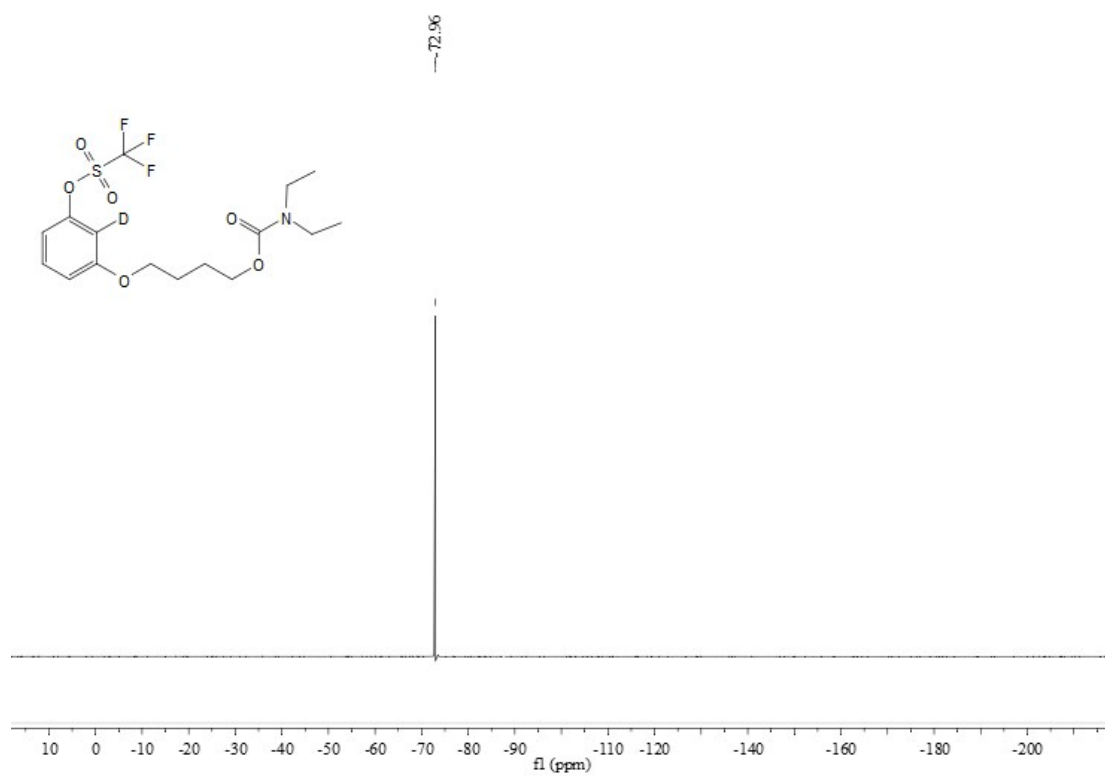

Supplement: c8cc01732h1.pdf [file c8cc01732h1.pdf]
